# Supplementary material
Source: publisher figshare collection journal article supplement (https://acs.figshare.com/ndownloader/files/4038493)

## Supporting information

### **Copper catalyzed $\beta$ -Difluoroacetylation of Dihydropyrans and Glycals by Means of Direct C-H Functionalization.**

Marie-Charlotte Belhomme, Thomas Poisson and Xavier Pannecoucke

*Normandie Univ, COBRA, UMR 6014 and FR 3038;  
Univ Rouen; Insa Rouen; CNRS; IRCOF  
1 rue Tesnière, 76821 Mont Saint-Aignan Cedex, France*

*xavier.pannecoucke@insa-rouen.fr  
[thomas.poisson@insa-rouen.fr](mailto:thomas.poisson@insa-rouen.fr)*

### **Table of contents**

|                                                                                |      |
|--------------------------------------------------------------------------------|------|
| <b>Section A:</b> General information.....                                     | S-2  |
| <b>Section B:</b> Optimization studies .....                                   | S-3  |
| <b>Section C:</b> Experimental procedures .....                                | S-4  |
| <b>Section D:</b> Copies of $^1\text{H}$ and $^{13}\text{C}$ NMR spectra ..... | S-17 |

## Section A: General information

### General

All reactions were carried out using oven dried glassware and magnetic stirring under an atmosphere of argon unless otherwise stated. Flash chromatography was performed with silica gel (0.040-0.060 nm). Analytical thin layer chromatography was performed on silica gel aluminium plates with F-254 indicator and visualized by UV light (254 nm) and/or chemical staining with KMnO<sub>4</sub> solution. <sup>1</sup>H NMR spectra were recorded on a Bruker DXP 300, <sup>13</sup>C NMR spectra at 75 MHz and <sup>19</sup>F NMR spectra at 282 MHz. Chemical shifts (δ) are quoted in parts per million (ppm) relative to residual solvent (CHCl<sub>3</sub>: δ = 7.27 ppm for <sup>1</sup>H, δ = 77.0 ppm for <sup>13</sup>C or relative to external CFC1<sub>3</sub>: δ = 0 ppm). The following abbreviations have been used: δ (chemical shift), *J* (coupling constant), s (singlet), brs (broad singlet), d (doublet), dd (doublet of doublets), ddd (doublet of doublet of doublets), t (triplet), q (quartet), dq (doublet of quartets), m (multiplet). High-resolution mass spectra (HRMS) were recorded on Waters LCT Premier, IR spectra were recorded on a PerkinElmer Spectrum 100. Optical rotations were measured in CHCl<sub>3</sub> on a Perkin-Elmer 341 polarimeter with a 1 cm cell (*c* are given in g/100 mL). Melting points are uncorrected.

### Material

All anhydrous solvents were dried by standard techniques and freshly distilled before use: dichloromethane were distilled from calcium hydride and tetrahydrofuran over Na/benzophenone. Dry DMF (sure sealed bottle) was purchased from Acros and NMP from VWR. Cs<sub>2</sub>CO<sub>3</sub> was purchased from Acros, K<sub>2</sub>CO<sub>3</sub> from Carlo Erba, Cu(OTf)<sub>2</sub>, Cu(CH<sub>3</sub>CN)<sub>4</sub>PF<sub>6</sub>, CuI from Aldrich, 2-hydroxymethyl-3,4-dihydro-2*H*-pyran from Alfa Aesar, 3,4,6-tri-*O*-acetyl-D-glucal, 3,4,6-tri-*O*-acetyl-D-galactal, 3,4-di-*O*-acetyl-6-deoxy-L-glucal and 3,4-di-*O*-acetyl-L-arabinal from Carbosynth and were used as received. Dihydropyran and ethyl bromodifluoroacetate were distilled prior to use. 3,4,6-tri-*O*-benzyl-D-glucal, 3,4,6-tri-*O*-methyl-D-glucal, 3,4,6-tri-*O*-pivaloyl-D-glucal,<sup>1</sup> 3,4,6-tri-*O*-(*p*-methoxybenzyl)-D-glucal,<sup>2</sup> 3,4,6-tri-*O*-benzyl-D-galactal,<sup>3</sup> 3,4,6-tri-*O*-methyl-D-galactal,<sup>4</sup> 3,4-di-*O*-benzyl-L-arabinal,<sup>5</sup> were prepared according to the known procedures.

<sup>1</sup> C. Bucher, R. Gilmour, *Angew. Chem. Int. Ed.* **2010**, 49, 8724-8728.

<sup>2</sup> A. Fürstner, K. Radkowski, J. Grabowski, C. Wirtz, R. Mynott, *J. Org. Chem.* **2000**, 65, 8758-8762.

<sup>3</sup> F. Leonelli, M. Capuzzi, V. Calcagno, P. Passacantilli, G. Piancatelli, *Eur. J. Org. Chem.* **2005**, 2671-2676.

<sup>4</sup> Bucher, C.; Gilmour, R. *Angew. Chem. Int. Ed.* **2010**, 49, 8724-8728.

<sup>5</sup> A.G. Tolstikov, N.V. Khakhalina, L.V. Spirikhin, *Synthesis* **1998**, 221-222.

## Section B: Optimization studies

Table 1. Solvent screening using **1a**.<sup>[a]</sup>

| Entry | Solvent     | Yield % <sup>b</sup> , (%) <sup>c</sup> |
|-------|-------------|-----------------------------------------|
| 1     | toluene     | NR                                      |
| 2     | THF         | 38                                      |
| 3     | 1,4-dioxane | 25                                      |
| 4     | MeCN        | 44                                      |
| 5     | DMF         | 42 (47)                                 |
| 6     | DMA         | 50 (43)                                 |
| 7     | DMI         | 47 (34)                                 |
| 8     | NMP         | 70 (65)                                 |
| 9     | water       | NR                                      |

[a] Reaction conditions: **1a** (0.36 mmol), BrCF<sub>2</sub>CO<sub>2</sub>Et (1.44 mmol), Cu(OTf)<sub>2</sub> (0.036 mmol), phenanthroline (0.043 mmol), Cs<sub>2</sub>CO<sub>3</sub> (0.72 mmol), solvent (1.8 mL). [b] Determined by <sup>19</sup>F NMR using α,α,α-trifluorotoluene as an internal standard. [c] Isolated yield.

Table 2. Base screening using **1a**.<sup>[a]</sup>

| Entry | Base                                        | Yield % <sup>b</sup> , (%) <sup>c</sup> |
|-------|---------------------------------------------|-----------------------------------------|
| 1     | Cs <sub>2</sub> CO <sub>3</sub>             | 42 (47)                                 |
| 2     | K <sub>2</sub> CO <sub>3</sub>              | 74(73)                                  |
| 3     | Na <sub>2</sub> CO <sub>3</sub>             | 12                                      |
| 4     | K <sub>3</sub> PO <sub>4</sub>              | 4                                       |
| 5     | 2,6-lutidine                                | 20                                      |
| 6     | 2,6- <sup>t</sup> Bu <sub>2</sub> -pyridine | NR                                      |
| 7     | Et <sub>3</sub> N                           | 21                                      |

[a] Reaction conditions: **1a** (0.36 mmol), BrCF<sub>2</sub>CO<sub>2</sub>Et (1.44 mmol), Cu(OTf)<sub>2</sub> (0.036 mmol), phenanthroline (0.043 mmol), base (0.72 mmol), DMF (1.8 mL). [b] Determined by <sup>19</sup>F NMR using α,α,α-trifluorotoluene as an internal standard. [c] Isolated yield.

Table 3. Ligand screening using **1a**.<sup>[a]</sup>

| Entry | Ligand              | Yield % <sup>b</sup> , (%) <sup>c</sup> |
|-------|---------------------|-----------------------------------------|
| 1     | Phenanthroline      | 74 (73)                                 |
| 2     | Bathophenanthroline | 77 (62)                                 |
| 3     | Neocuproine         | 61                                      |
| 4     | Bathocuproine       | 61                                      |
| 5     | 2,2'-bipyridine     | 33                                      |
| 6     | Terpyridine         | 13                                      |
| 7     | BINAP               | 28                                      |

[a] Reaction conditions: **1a** (0.36 mmol), BrCF<sub>2</sub>CO<sub>2</sub>Et (1.44 mmol), Cu(OTf)<sub>2</sub> (0.036 mmol), ligand (0.043 mmol), K<sub>2</sub>CO<sub>3</sub> (0.72 mmol), DMF (1.8 mL). [b] Determined by <sup>19</sup>F NMR using α,α,α-trifluorotoluene as an internal standard. [c] Isolated yield.

## Section C: Experimental procedures

### General Procedure for copper cross-coupling reaction of dihydropyran derivatives (A)

Under an air atmosphere, Cu(OTf)<sub>2</sub> (13 mg, 0.036 mmol), phenanthroline (8 mg, 0.043 mmol) and K<sub>2</sub>CO<sub>3</sub> (100 mg, 0.72 mmol) were dissolved in DMF (1.8 mL). Then enol ether (0.36 mmol) and ethyl bromodifluoroacetate (0.19 mL, 1.44 mmol) were added and the tube was sealed. The resulting mixture was heated at 80 °C for 18h. The solution was cooled and extracted with Et<sub>2</sub>O (3 x 10 mL). The organic layer was washed with water (2 x 10 mL), brine (2 x 10 mL) and dried over MgSO<sub>4</sub>. The solvent was removed under vacuum and the residue was purified by flash chromatography (SiO<sub>2</sub>, pentane/Et<sub>2</sub>O).

### General Procedure for copper cross-coupling reaction of glycol derivatives (B)

Under an air atmosphere, Cu(CH<sub>3</sub>CN)<sub>4</sub>PF<sub>6</sub> (9 mg, 0.024 mmol), phenanthroline (5 mg, 0.029 mmol) and K<sub>2</sub>CO<sub>3</sub> (66 mg, 0.48 mmol) were dissolved in DMF (1.2 mL). Then glycol derivative (0.24 mmol) and ethyl bromodifluoroacetate (0.25 mL, 1.92 mmol) were added and the tube was sealed. The resulting mixture was heated at 110 °C for 24h. The solution was cooled and extracted with Et<sub>2</sub>O (3 x 8 mL). The organic layer was washed with water (2 x 8 mL), brine (2 x 8 mL) and dried over MgSO<sub>4</sub>. The solvent was removed under vacuum and the residue was purified by flash chromatography (SiO<sub>2</sub>, pentane/Et<sub>2</sub>O).

A crude NMR yield could be determined using PhCF<sub>3</sub> as an internal standard.

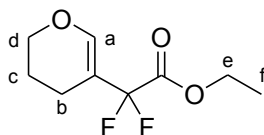

**3,4-dihydro-5-(ethyl difluoro acetate)-2H-pyran 2a.** Prepared following the procedure **A** from dihydropyran **1a**. Compound **2a** was obtained as a colorless oil in 73% yield (54 mg) after flash chromatography (SiO<sub>2</sub>, pentane/Et<sub>2</sub>O 19: 1, *R<sub>f</sub>* = 0.34) (*caution: the product is highly volatile*).

**<sup>1</sup>H NMR (CDCl<sub>3</sub>, 300 MHz)** δ 6.84 (brs, 1H, H<sub>a</sub>), 4.33 (q, 2H, H<sub>e</sub>, *J<sub>HH</sub>* = 7.1 Hz), 4.00 (dd, 2H, H<sub>d</sub>, *J<sub>HH</sub>* = 5.3, 5.1 Hz), 2.14 (dt, 2H, H<sub>b</sub>, *J<sub>HH</sub>* = 6.3, 1.1 Hz), 1.93-1.85 (m, 2H, H<sub>c</sub>), 1.35 (t, 3H, H<sub>f</sub>, *J<sub>HH</sub>* = 7.1 Hz). **<sup>13</sup>C NMR (CDCl<sub>3</sub>, 75 MHz)** δ 164.0 (t, *J<sub>CF</sub>* = 35.8 Hz), 146.3 (t, *J<sub>CF</sub>* = 11.0 Hz), 114.3 (t, *J<sub>CF</sub>* = 248.1 Hz), 105.9 (t, *J<sub>CF</sub>* = 24.8 Hz), 66.0, 62.8, 21.0, 17.8 (t, *J<sub>CF</sub>* = 2.8 Hz), 13.9. **<sup>19</sup>F NMR (CDCl<sub>3</sub>, CFCl<sub>3</sub>, 282 MHz)** δ -105.3 (s, 2F). **IR** (neat, cm<sup>-1</sup>) 2941, 1760, 1662, 1256, 1009. **HRMS** (AP<sup>+</sup>): calcd for [M+H]<sup>+</sup> C<sub>9</sub>H<sub>13</sub>F<sub>2</sub>O<sub>3</sub>: 207.0833 found: 207.0827 (-2.9 ppm).

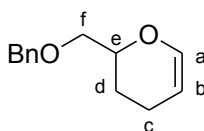

**2-(benzyloxymethyl)-3,4-dihydro-2H-pyran 1b.** To a solution of 2-hydroxymethyl-3,4-dihydro-2H-pyran (1 g, 8.76 mmol) and TBAI (325 mg, 0.88 mmol) in DMF (70 mL) was added NaH (279 mg, 11.4 mmol, 98%) at room temperature over 15min. Then BnBr (1.4 mL, 11.4 mmol) was added dropwise at 0 °C and the mixture was allowed to warm up to room temperature. After 7h, the reaction mixture was quenched with sat. aq. NH<sub>4</sub>Cl (30 mL) and extracted with Et<sub>2</sub>O (3 x 30 mL). The combined organic layers were washed with water (2 x 20 mL), brine (2 x 20 mL) and dried over MgSO<sub>4</sub>. The solvent was removed under vacuum and the residue was purified by flash chromatography (cyclohexane/EtOAc 19: 1, *R<sub>f</sub>* = 0.33) to afford **1b** as a colorless oil in 84% yield (1.5 g).

**<sup>1</sup>H NMR (CDCl<sub>3</sub>, 300 MHz)** δ 7.37-7.28 (m, 5H, Bn), 6.41 (d, 1H, H<sub>a</sub>, *J* = 6.2 Hz), 4.72-4.67 (m, 1H, H<sub>b</sub>), 4.63 (d, 1H, Bn, *J* = 12.3 Hz), 4.58 (d, 1H, Bn, *J* = 12.3 Hz), 4.08-4.00 (m, 1H, H<sub>e</sub>), 3.57 (dq, 2H, H<sub>f</sub>, *J* = 10.1, 6.2 Hz), 2.18-2.04 (m, 1H, H<sub>c</sub>), 2.03-1.93 (m, 1H, H<sub>c</sub>), 1.89-1.83 (m, 1H, H<sub>d</sub>), 1.77-1.63 (m, 1H, H<sub>d</sub>). **<sup>13</sup>C NMR (CDCl<sub>3</sub>, 75 MHz)** δ 143.2, 137.8, 127.9 (2C), 127.23 (2C), 127.17, 99.9, 73.6, 72.9, 72.0, 24.2, 18.9. **IR** (neat, cm<sup>-1</sup>) 3058, 2857, 1649, 1240, 1070, 731. **HRMS** (EI): calcd for [M] C<sub>13</sub>H<sub>16</sub>O<sub>2</sub>: 204.1150 found: 204.1143 (-3.4 ppm). Spectral data in accordance with literature: A. Boshi, C. Chiappe, A. De Rubertis, M.-F. Ruasse, *J. Org. Chem.* **2000**, *65*, 8470-8477.

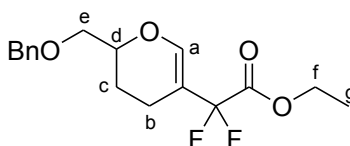

**2-(benzyloxymethyl)-3,4-dihydro-5-(ethyl difluoro acetate)-2H-pyran 2b.** Prepared following the procedure **A** from 2-(benzyloxymethyl)-3,4-dihydro-2H-pyran **1b**. Reaction was carried out on a 0.24 mmol scale using Cu(CH<sub>3</sub>CN)<sub>4</sub>PF<sub>6</sub> (9 mg, 0.024 mmol) as a catalyst.

Compound **2b** was obtained as a colorless oil in 72% yield (56 mg) after flash chromatography (SiO<sub>2</sub>, pentane/Et<sub>2</sub>O 19: 1, *R*<sub>f</sub> = 0.37).

**<sup>1</sup>H NMR (CDCl<sub>3</sub>, 300 MHz)** δ 7.40-7.28 (m, 5H, Bn), 6.88 (brs, 1H, H<sub>a</sub>), 4.64-4.55 (m, 2H, Bn), 4.33 (q, 2H, H<sub>f</sub>, *J*<sub>HH</sub> = 7.2 Hz), 4.10-4.03 (m, 1H, H<sub>d</sub>), 3.62 (dd, 1H, H<sub>e</sub>, *J*<sub>HH</sub> = 10.2, 5.7 Hz), 3.56 (dd, 1H, H<sub>e'</sub>, *J*<sub>HH</sub> = 10.2, 4.5 Hz), 2.21-2.16 (m, 2H, H<sub>b</sub>), 2.00-1.92 (m, 1H, H<sub>c</sub>), 1.80-1.66 (m, 1H, H<sub>c'</sub>), 1.35 (t, 3H, H<sub>g</sub>, *J*<sub>HH</sub> = 7.2 Hz). **<sup>13</sup>C NMR (CDCl<sub>3</sub>, 75 MHz)** δ 164.0 (t, *J*<sub>CF</sub> = 35.8 Hz), 146.0 (t, *J*<sub>CF</sub> = 11.0 Hz), 137.8, 128.4, 127.8 (2C), 127.7 (2C), 114.2 (dd, *J*<sub>CF</sub> = 248.7, 248.7 Hz), 105.8 (t, *J*<sub>CF</sub> = 25.3 Hz), 74.9, 73.5, 71.6, 62.8, 23.0, 17.7 (t, *J*<sub>CF</sub> = 2.8 Hz), 14.0. **<sup>19</sup>F NMR (CDCl<sub>3</sub>, CFCI<sub>3</sub>, 282 MHz)** δ -104.5 (d, *J*<sub>FF</sub> = 253.4 Hz), -105.9 (d, *J*<sub>FF</sub> = 253.4 Hz). **IR** (neat, cm<sup>-1</sup>) 2859, 1760, 1662, 1271, 1198, 1089. **HRMS** (AP<sup>+</sup>): calcd for [M+H]<sup>+</sup> C<sub>17</sub>H<sub>21</sub>F<sub>2</sub>O<sub>4</sub>: 327.1408 found: 327.1401 (-2.1 ppm).

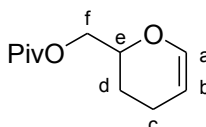

**2-(pivaloyloxymethyl)-3,4-dihydro-2H-pyran 1c.** To a solution of 2-hydroxymethyl-3,4-dihydro-2H-pyran (1.5 g, 13 mmol) and DMAP (3.2 g, 26 mmol) in THF (60 mL), PivCl (3.2 mL, 26 mmol) was added at 0 °C. The suspension was allowed to warm up to room temperature. After 12h, the reaction mixture was diluted with water (35 mL) and DCM (35 mL). The aqueous phase was extracted with DCM (2 x 35 mL). The combined organic phases were washed with brine (40 mL) and dried over MgSO<sub>4</sub>. The solvent was removed under vacuum and the residue was purified by flash chromatography (cyclohexane/EtOAc 19: 1, *R*<sub>f</sub> = 0.39) to afford **1c** as a colorless oil in 89% yield (2.3 g).

**<sup>1</sup>H NMR (CDCl<sub>3</sub>, 300 MHz)** δ 6.38 (dt, 1H, H<sub>a</sub>, *J*<sub>HH</sub> = 6.2, 1.9 Hz), 4.73-4.68 (m, 1H, H<sub>b</sub>), 4.18-4.17 (d, 2H, H<sub>f</sub>, *J*<sub>HH</sub> = 5.1 Hz), 4.07-4.00 (m, 1H, H<sub>e</sub>), 2.18-1.94 (m, 2H, H<sub>c</sub>), 1.90-1.83 (m, 1H, H<sub>d</sub>), 1.76-1.63 (m, 1H, H<sub>d'</sub>), 1.23 (s, 9H, Piv). **<sup>13</sup>C NMR (CDCl<sub>3</sub>, 75 MHz)** δ 177.9, 143.0, 99.9, 72.3, 65.4, 38.4, 26.7 (3C), 23.8, 18.7. **IR** (neat, cm<sup>-1</sup>) 2971, 2935, 1810, 1737, 1156, 1035, 999. **HRMS** (AP<sup>+</sup>): calcd for [M+H]<sup>+</sup> C<sub>11</sub>H<sub>19</sub>O<sub>3</sub>: 199.1334 found: 199.1338 (+2.0 ppm).

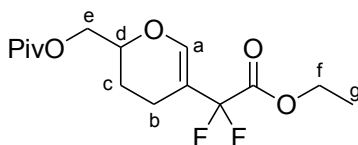

**2-(pivaloyloxymethyl)-3,4-dihydro-5-(ethyl difluoro acetate)-2H-pyran 2c.** Prepared following the procedure **A** from 2-(pivaloyloxymethyl)-3,4-dihydro-2H-pyran **1c**. Reaction was carried out on a 0.24 mmol scale using Cu(CH<sub>3</sub>CN)<sub>4</sub>PF<sub>6</sub> (9 mg, 0.024 mmol) as a catalyst. Compound **2c** was obtained as a colorless oil in 60% yield (46 mg) after flash chromatography (SiO<sub>2</sub>, pentane/Et<sub>2</sub>O 9: 1, *R*<sub>f</sub> = 0.34).

**<sup>1</sup>H NMR (CDCl<sub>3</sub>, 300 MHz)** δ 6.86 (brs, 1H, H<sub>a</sub>), 4.33 (q, 2H, H<sub>f</sub>, *J*<sub>HH</sub> = 7.2 Hz), 4.22 (dd, 1H, H<sub>e</sub>, *J*<sub>HH</sub> = 11.7, 4.7 Hz), 4.17 (dd, 1H, H<sub>e'</sub>, *J*<sub>HH</sub> = 11.7, 5.3 Hz), 4.12-4.04 (m, 1H, H<sub>d</sub>), 2.23-2.19 (m, 2H, H<sub>b</sub>), 2.00-1.92 (m, 1H, H<sub>c</sub>), 1.77-1.67 (m, 1H, H<sub>c'</sub>), 1.36 (t, 3H, H<sub>g</sub>, *J*<sub>HH</sub> = 7.2 Hz), 1.22 (s, 9H, Piv). **<sup>13</sup>C NMR (CDCl<sub>3</sub>, 75 MHz)** δ 178.2, 163.9 (t, *J*<sub>CF</sub> = 35.8 Hz), 145.8 (dd, *J*<sub>CF</sub> = 11.0, 11.0 Hz), 114.1 (dd, *J*<sub>CF</sub> = 248.7, 248.7 Hz), 105.9 (t, *J*<sub>CF</sub> = 24.8 Hz), 73.5, 65.1, 62.9, 38.8, 27.1 (3C), 22.8, 17.6 (t, *J*<sub>CF</sub> = 2.8 Hz), 13.9. **<sup>19</sup>F NMR (CDCl<sub>3</sub>, CFCI<sub>3</sub>, 282 MHz)** δ -103.9 (d, *J*<sub>FF</sub> = 253.4 Hz), -105.6 (d, *J*<sub>FF</sub> = 253.4 Hz). **IR** (neat, cm<sup>-1</sup>) 2971, 1755, 1737, 1659,

1283, 1156, 1096. **HRMS** (AP<sup>+</sup>): calcd for [M+H]<sup>+</sup> C<sub>15</sub>H<sub>23</sub>F<sub>2</sub>O<sub>5</sub>: 321.1514 found: 321.1520 (+1.9 ppm).

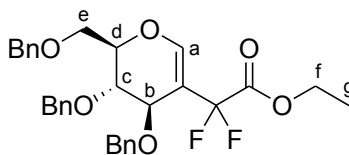

**1,5-anhydro-3,4,6-tri-O-benzyl-2-deoxy-2-(ethyl difluoro acetate)-D-arabino-hex-1-enitol 2d.** Prepared following the procedure **B** from 3,4,6-tri-O-benzyl-D-glucal **1d**. Compound **2d** was obtained as a colorless oil in 62% yield (80 mg) after flash chromatography (SiO<sub>2</sub>, pentane/Et<sub>2</sub>O 4: 1, *R<sub>f</sub>* = 0.30).

**<sup>1</sup>H NMR** (CDCl<sub>3</sub>, 300 MHz) δ 7.37-7.19 (m, 15H, Bn), 6.97 (d, 1H, H<sub>a</sub>, *J*<sub>HF</sub> = 2.6 Hz), 4.61-4.60 (m, 2H, Bn), 4.50-4.49 (m, 4H, Bn), 4.45-4.40 (m, 1H, H<sub>d</sub>), 4.14-4.01 (m, 3H, H<sub>b,f</sub>), 3.89-3.86 (m, 1H, H<sub>c</sub>), 3.78 (dd, 1H, H<sub>e</sub>, *J*<sub>HH</sub> = 10.6, 6.4 Hz), 3.66 (dd, 1H, H<sub>e</sub>, *J*<sub>HH</sub> = 10.6, 4.5 Hz), 1.15 (t, 3H, H<sub>g</sub>, *J*<sub>HH</sub> = 7.2 Hz). **<sup>13</sup>C NMR** (CDCl<sub>3</sub>, 75 MHz) δ 163.9 (dd, *J*<sub>CF</sub> = 37.9, 33.6 Hz), 146.6 (dd, *J*<sub>CF</sub> = 12.7, 9.4 Hz), 137.6, 137.5, 137.3, 128.5 (2C), 128.4 (2C), 128.2 (2C), 128.0, 127.8 (2C), 127.73 (2C), 127.69 (2C), 127.63 (2C), 113.4 (t, *J*<sub>CF</sub> = 250.3 Hz), 105.7 (dd, *J*<sub>CF</sub> = 26.4, 22.0 Hz), 76.3, 73.3, 72.5, 72.2, 71.9, 70.0 (d, *J*<sub>CF</sub> = 3.9 Hz), 67.6, 62.6, 13.7. **<sup>19</sup>F NMR** (CDCl<sub>3</sub>, CFCl<sub>3</sub>, 282 MHz) δ -103.2 (d, *J*<sub>FF</sub> = 256.5 Hz), -109.4 (d, *J*<sub>FF</sub> = 256.5 Hz). **IR** (neat, cm<sup>-1</sup>) 2928, 2869, 1762, 1291, 1202, 1088, 1068. **HRMS** (ESI<sup>+</sup>): calcd for [M+Na]<sup>+</sup> C<sub>31</sub>H<sub>32</sub>F<sub>2</sub>O<sub>6</sub>Na: 561.2065 found: 561.2063 (-0.4 ppm). [ $\alpha$ ]<sub>D</sub><sup>20</sup> = -9.2° (c = 0.25, CHCl<sub>3</sub>).

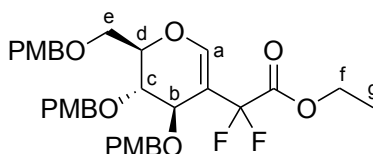

**1,5-anhydro-3,4,6-tri-O-(p-methoxybenzyl)-2-deoxy-2-(ethyl difluoro acetate)-D-arabino-hex-1-enitol 2e.** Prepared following the procedure **B** from 3,4,6-tri-O-(p-methoxybenzyl)-D-glucal **1e** except that the reaction mixture was heated at 110 °C for 30h instead of 24h. Compound **2e** was obtained as a colorless oil in 50% (76 mg) yield after flash chromatography (SiO<sub>2</sub>, pentane/Et<sub>2</sub>O 1: 1, *R<sub>f</sub>* = 0.62).

**<sup>1</sup>H NMR** (CDCl<sub>3</sub>, 300 MHz) δ 7.25-7.14 (m, 6H, PMB), 6.95 (d, 1H, H<sub>a</sub>, *J*<sub>HF</sub> = 2.6 Hz), 6.89-6.81 (m, 6H, PMB), 4.60-4.34 (m, 8H, PMB, H<sub>c,d</sub>), 4.16-4.01 (m, 3H, H<sub>b,f</sub>), 3.81 (s, 3H, PMB), 3.81 (s, 3H, PMB), 3.80 (s, 3H, PMB), 3.73 (dd, 1H, H<sub>e</sub>, *J*<sub>HH</sub> = 10.6, 6.6 Hz), 3.60 (dd, 1H, H<sub>e</sub>, *J*<sub>HH</sub> = 10.6, 4.3 Hz), 1.16 (t, 3H, H<sub>g</sub>, *J*<sub>HH</sub> = 7.2 Hz). **<sup>13</sup>C NMR** (CDCl<sub>3</sub>, 75 MHz) δ 164.0 (dd, *J*<sub>CF</sub> = 38.0, 34.1 Hz), 159.4 (2C), 159.2 (2C), 159.1 (2C), 146.6 (dd, *J*<sub>CF</sub> = 12.7, 9.4 Hz), 129.8, 129.7, 129.5, 129.44, 129.40, 129.37, 113.8 (2C), 113.7 (2C), 113.5 (2C), 113.4 (t, *J*<sub>CF</sub> = 250.3 Hz), 105.8 (dd, *J*<sub>CF</sub> = 26.4, 22.0 Hz), 76.5, 73.0, 72.2, 71.9, 71.7, 69.9 (d, *J*<sub>CF</sub> = 3.9 Hz), 67.4, 62.6, 55.2 (3C), 13.8. **<sup>19</sup>F NMR** (CDCl<sub>3</sub>, CFCl<sub>3</sub>, 282 MHz) δ -103.2 (d, *J*<sub>FF</sub> = 255.5 Hz), -109.5 (d, *J*<sub>FF</sub> = 255.5 Hz). **IR** (neat, cm<sup>-1</sup>) 2936, 1763, 1611, 1513, 1301, 1246, 1075, 1030. **HRMS** (ESI<sup>+</sup>): calcd for [M+NH<sub>4</sub>]<sup>+</sup> C<sub>34</sub>H<sub>42</sub>F<sub>2</sub>NO<sub>9</sub>: 646.2828 found: 646.2839 (+1.7 ppm). [ $\alpha$ ]<sub>D</sub><sup>20</sup> = -25.5° (c = 0.20, CHCl<sub>3</sub>).

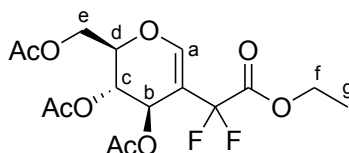

**1,5-anhydro-3,4,6-tri-O-acetyl-2-deoxy-2-(ethyl difluoro acetate)-D-arabino-hex-1-enitol 2f.** Prepared following the procedure **B** from 3,4,6-tri-O-acetyl-D-glucal **1f**. Compound **2f** was obtained as a colorless oil in 65% yield (62 mg) after flash chromatography (SiO<sub>2</sub>, pentane/Et<sub>2</sub>O 3: 2, *R<sub>f</sub>* = 0.22).

**<sup>1</sup>H NMR (CDCl<sub>3</sub>, 300 MHz)** δ 7.08 (brs, 1H, H<sub>a</sub>), 5.61 (d, 1H, H<sub>b</sub>, *J<sub>HH</sub>* = 4.3 Hz), 5.16 (t, 1H, H<sub>c</sub>, *J<sub>HH</sub>* = 4.3 Hz), 4.47-4.18 (m, 5H, H<sub>d,e,f</sub>), 2.10 (s, 3H, Ac), 2.09 (s, 3H, Ac), 2.03 (s, 3H, Ac), 1.36 (t, 3H, H<sub>g</sub>, *J<sub>HH</sub>* = 7.2 Hz). **<sup>13</sup>C NMR (CDCl<sub>3</sub>, 75 MHz)** δ 170.3, 169.4, 169.3, 163.3 (dd, *J<sub>CF</sub>* = 35.8, 35.8 Hz), 148.7 (t, *J<sub>CF</sub>* = 10.5 Hz), 112.6 (dd, *J<sub>CF</sub>* = 250.9, 250.9 Hz), 104.0 (t, *J<sub>CF</sub>* = 24.8 Hz), 74.1, 66.1, 63.1, 62.8 (dd, *J<sub>CF</sub>* = 3.3, 2.2 Hz), 60.8, 20.7, 20.6, 20.5, 13.7. **<sup>19</sup>F NMR (CDCl<sub>3</sub>, CFCI<sub>3</sub>, 282 MHz)** δ -104.3 (d, *J<sub>FF</sub>* = 262.6 Hz), -105.4 (d, *J<sub>FF</sub>* = 262.6 Hz). **IR** (neat, cm<sup>-1</sup>) 2990, 1743, 1661, 1369, 1216, 1198, 1021. **HRMS** (ESI<sup>+</sup>): calcd for [M+Na]<sup>+</sup> C<sub>16</sub>H<sub>20</sub>F<sub>2</sub>O<sub>9</sub>Na: 417.0980 found: 417.0973 (-1.7 ppm). [ $\alpha$ ]<sub>D</sub><sup>20</sup> = +31.2° (c = 0.25, CHCl<sub>3</sub>).

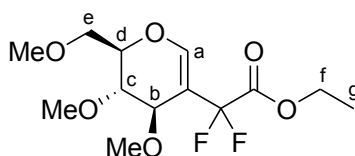

**1,5-anhydro-3,4,6-tri-O-methyl-2-deoxy-2-(ethyl difluoro acetate)-D-arabino-hex-1-enitol 2g.** Prepared following the procedure **B** from 3,4,6-tri-O-methyl-D-glucal **1g**. Compound **2g** was obtained as a colorless oil in 51% yield (38 mg) after flash chromatography (SiO<sub>2</sub>, pentane/Et<sub>2</sub>O 4: 1, *R<sub>f</sub>* = 0.28).

**<sup>1</sup>H NMR (CDCl<sub>3</sub>, 300 MHz)** δ 6.89 (d, 1H, H<sub>a</sub>, *J<sub>HF</sub>* = 3.0 Hz), 4.38-4.21 (m, 3H, H<sub>c,f</sub>), 3.82 (d, 1H, H<sub>b</sub>, *J<sub>HH</sub>* = 4.2 Hz), 3.70-3.52 (m, 3H, H<sub>d,e</sub>), 3.49 (s, 3H, Me), 3.40 (s, 3H, Me), 3.39 (s, 3H, Me), 1.33 (t, 3H, H<sub>g</sub>, *J<sub>HH</sub>* = 7.2 Hz). **<sup>13</sup>C NMR (CDCl<sub>3</sub>, 75 MHz)** δ 164.0 (dd, *J<sub>CF</sub>* = 38.0, 33.6 Hz), 146.3 (dd, *J<sub>CF</sub>* = 12.7, 8.8 Hz), 113.2 (t, *J<sub>CF</sub>* = 250.3 Hz), 106.1 (dd, *J<sub>CF</sub>* = 26.4, 21.5 Hz), 76.0, 74.4, 72.4 (dd, *J<sub>CF</sub>* = 3.9 Hz), 69.9, 62.7, 59.1, 58.3, 58.1, 13.9. **<sup>19</sup>F NMR (CDCl<sub>3</sub>, CFCI<sub>3</sub>, 282 MHz)** δ -102.9 (d, *J<sub>FF</sub>* = 256.5 Hz), -110.4 (d, *J<sub>FF</sub>* = 256.5 Hz). **IR** (neat, cm<sup>-1</sup>) 2935, 1765, 1667, 1456, 1371, 1294, 1203, 1081, 1198. **HRMS** (ESI<sup>+</sup>): calcd for [M+NH<sub>4</sub>]<sup>+</sup> C<sub>13</sub>H<sub>24</sub>F<sub>2</sub>NO<sub>6</sub>: 328.1572 found: 328.1558 (-4.2 ppm). [ $\alpha$ ]<sub>D</sub><sup>20</sup> = +77.6° (c = 0.25, CHCl<sub>3</sub>).

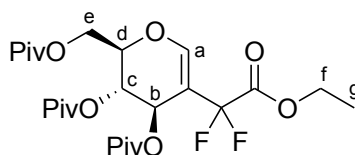

**1,5-anhydro-3,4,6-tri-O-pivaloyl-2-deoxy-2-(ethyl difluoro acetate)-D-arabino-hex-1-enitol 2h.** Prepared following the procedure **B** from 3,4,6-tri-O-pivaloyl-D-glucal **1h**. Compound **2h** was obtained as a colorless oil in 67% yield (84 mg) after flash chromatography (SiO<sub>2</sub>, pentane/Et<sub>2</sub>O 9: 1, *R<sub>f</sub>* = 0.21).



**<sup>1</sup>H NMR (CDCl<sub>3</sub>, 300 MHz)** δ 7.08 (brs, 1H, H<sub>a</sub>), 5.53 (d, 1H, H<sub>b</sub>, *J*<sub>HH</sub> = 3.4 Hz), 5.10 (t, 1H, H<sub>c</sub>, *J*<sub>HH</sub> = 3.4 Hz), 4.41-4.52 (m, 2H, H<sub>e</sub>), 4.32 (q, 2H, H<sub>f</sub>, *J*<sub>HH</sub> = 7.2 Hz), 4.11 (q, 1H, H<sub>d</sub>, *J*<sub>HH</sub> = 7.6 Hz), 1.35 (t, 3H, H<sub>g</sub>, *J*<sub>HH</sub> = 7.2 Hz), 1.21 (s, 9H, Piv), 1.19 (s, 9H, H<sub>g</sub>, Piv), 1.17 (s, 9H, Piv). **<sup>13</sup>C NMR (CDCl<sub>3</sub>, 75 MHz)** δ 177.7, 176.5, 176.2, 163.0 (t, *J*<sub>CF</sub> = 35.8 Hz), 148.6 (dd, *J*<sub>CF</sub> = 11.0, 9.9 Hz), 112.8 (t, *J*<sub>CF</sub> = 251.4 Hz), 103.6 (dd, *J*<sub>CF</sub> = 25.9, 24.2 Hz), 73.9, 65.6, 62.9, 61.8 (t, *J*<sub>CF</sub> = 2.2 Hz), 60.8, 38.59, 38.57, 38.56, 26.9 (3C), 26.69 (3C), 26.67 (3C), 13.7. **<sup>19</sup>F NMR (CDCl<sub>3</sub>, CFCl<sub>3</sub>, 282 MHz)** δ -100.7 (d, *J*<sub>FF</sub> = 265.7 Hz), -105.0 (d, *J*<sub>FF</sub> = 265.7 Hz). **IR** (neat, cm<sup>-1</sup>) 2975, 1734, 1661, 1481, 1277, 1122. **HRMS** (ESI<sup>+</sup>): calcd for [M+NH<sub>4</sub>]<sup>+</sup> C<sub>25</sub>H<sub>42</sub>F<sub>2</sub>NO<sub>9</sub>: 538.2828 found: 538.2831 (+0.6 ppm). [ $\alpha$ ]<sub>D</sub><sup>20</sup> = +4.0° (c = 0.25, CHCl<sub>3</sub>).

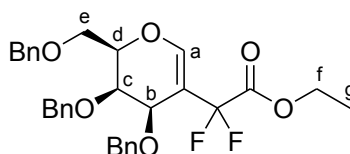

**1,5-anhydro-3,4,6-tri-O-benzyl-2-deoxy-2-(ethyl difluoro acetate)-D-lyxo-hex-1-enitol 2i.**

Prepared following the procedure **B** from 3,4,6-tri-O-benzyl-D-galactal **1i**. Compound **2i** was obtained as a colorless oil in 49% yield (63 mg) after flash chromatography (SiO<sub>2</sub>, pentane/Et<sub>2</sub>O 9: 1, *R*<sub>f</sub> = 0.29).

**<sup>1</sup>H NMR (CDCl<sub>3</sub>, 300 MHz)** δ 7.37-7.28 (m, 15H, Bn), 6.89 (d, 1H, H<sub>a</sub>, *J*<sub>HF</sub> = 2.8 Hz), 4.79-4.39 (m, 7H, H<sub>d</sub>, Bn), 4.33-4.32 (m, 1H, H<sub>b</sub>), 4.04 (q, 2H, H<sub>f</sub>, *J*<sub>HH</sub> = 7.2 Hz), 4.00-3.97 (m, 1H, H<sub>c</sub>), 3.73 (dd, 1H, H<sub>e</sub>, *J*<sub>HH</sub> = 10.6, 6.6 Hz), 3.60 (dd, 1H, H<sub>e'</sub>, *J*<sub>HH</sub> = 10.6, 4.5 Hz), 1.09 (t, 3H, H<sub>g</sub>, *J*<sub>HH</sub> = 7.2 Hz). **<sup>13</sup>C NMR (CDCl<sub>3</sub>, 75 MHz)** δ 163.8 (dd, *J*<sub>CF</sub> = 38.5, 33.0 Hz), 146.2 (dd, *J*<sub>CF</sub> = 13.2, 9.4 Hz), 137.9, 137.8, 137.7, 128.48 (2C), 128.45 (2C), 128.2 (2C), 128.0 (2C), 127.94, 127.92 (2C), 127.8, 127.73 (2C), 127.67, 113.3 (dd, *J*<sub>CF</sub> = 249.8, 248.1 Hz), 106.7 (dd, *J*<sub>CF</sub> = 26.4, 20.4 Hz), 76.1, 73.9, 73.5, 72.9, 72.1, 69.5, 67.8, 62.6, 13.7. **<sup>19</sup>F NMR (CDCl<sub>3</sub>, CFCl<sub>3</sub>, 282 MHz)** δ -101.9 (d, *J*<sub>FF</sub> = 257.5 Hz), -109.8 (d, *J*<sub>FF</sub> = 257.5 Hz). **IR** (neat, cm<sup>-1</sup>) 2923, 2863, 1761, 1296, 1211, 1096. **HRMS** (ES<sup>+</sup>): calcd for [M+NH<sub>4</sub>]<sup>+</sup> C<sub>31</sub>H<sub>36</sub>F<sub>2</sub>NO<sub>6</sub>: 556.2511 found: 556.2527 (+2.87 ppm). [ $\alpha$ ]<sub>D</sub><sup>20</sup> = -11.5° (c = 0.4, CHCl<sub>3</sub>).

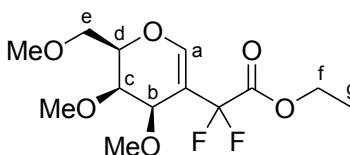

**1,5-anhydro-3,4,6-tri-O-methyl-2-deoxy-2-(ethyl difluoro acetate)-D-lyxo-hex-1-enitol 2j.**

Prepared following the procedure **B** from 3,4,6-tri-O-methyl-D-galactal **1j**. Compound **2j** was obtained as a colorless oil in 50% yield (37 mg) after flash chromatography (SiO<sub>2</sub>, pentane/Et<sub>2</sub>O 7: 3, *R*<sub>f</sub> = 0.31).

**<sup>1</sup>H NMR (CDCl<sub>3</sub>, 300 MHz)** δ 6.84 (d, 1H, H<sub>a</sub>, *J*<sub>HF</sub> = 2.8 Hz), 4.40-4.24 (m, 3H, H<sub>c,f</sub>), 4.06-4.05 (m, 1H, H<sub>b</sub>), 3.77-3.62 (m, 3H, H<sub>d,e</sub>), 3.56 (s, 3H, Me), 3.43 (s, 3H, Me), 3.41 (s, 3H, Me), 1.34 (t, 3H, H<sub>g</sub>, *J*<sub>HH</sub> = 7.0 Hz). **<sup>13</sup>C NMR (CDCl<sub>3</sub>, 75 MHz)** δ 163.8 (dd, *J*<sub>CF</sub> = 38.5, 33.6 Hz), 146.0 (dd, *J*<sub>CF</sub> = 12.7, 9.4 Hz), 113.2 (dd, *J*<sub>CF</sub> = 250.3, 248.1 Hz), 106.7 (dd, *J*<sub>CF</sub> = 26.4, 20.9 Hz), 75.8, 73.9, 71.2 (d, *J*<sub>CF</sub> = 3.9 Hz), 69.9, 62.6, 59.4, 59.3, 59.2, 13.9. **<sup>19</sup>F NMR (CDCl<sub>3</sub>, CFCl<sub>3</sub>, 282 MHz)** δ -102.2 (d, *J*<sub>FF</sub> = 258.5 Hz), -109.4 (d, *J*<sub>FF</sub> = 258.5 Hz). **IR** (neat, cm<sup>-1</sup>) 2942, 2841,

1767, 1665, 1275, 1199, 1095. **HRMS** (ES<sup>+</sup>): calcd for [M+NH<sub>4</sub>]<sup>+</sup> C<sub>13</sub>H<sub>24</sub>F<sub>2</sub>NO<sub>6</sub>: 328.1572 found: 328.1570 (-0.6 ppm).  $[\alpha]_D^{20} = 27.5^\circ$  (c = 0.6, CHCl<sub>3</sub>).

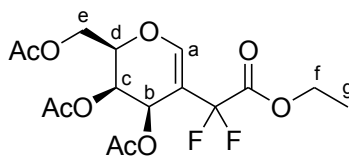

**1,5-anhydro-3,4,6-tri-O-acetyl-2-deoxy-2-(ethyl difluoro acetate)-D-lyxo-hex-1-enitol 2k.**

Prepared following the procedure **B** from 3,4,6-tri-O-acetyl-D-galactal **1k**. Compound **2k** was obtained as a colorless oil in 40% yield (38 mg) after flash chromatography (SiO<sub>2</sub>, pentane/Et<sub>2</sub>O 3: 2, *R<sub>f</sub>* = 0.26).

**<sup>1</sup>H NMR (CDCl<sub>3</sub>, 300 MHz)** δ 7.02 (d, 1H, H<sub>a</sub>, *J*<sub>HF</sub> = 1.1 Hz), 5.80 (d, 1H, H<sub>b</sub>, *J*<sub>HH</sub> = 4.1 Hz), 5.44 (dd, 1H, H<sub>c</sub>, *J*<sub>HH</sub> = 4.1, 2.6 Hz), 4.44-4.22 (m, 5H, H<sub>d,e,f</sub>), 2.10 (s, 6H, Ac), 2.00 (s, 3H, Ac), 1.35 (t, 3H, H<sub>g</sub>, *J*<sub>HH</sub> = 7.2 Hz). **<sup>13</sup>C NMR (CDCl<sub>3</sub>, 75 MHz)** δ 170.5, 169.7, 169.5, 163.3 (dd, *J*<sub>CF</sub> = 35.8, 35.8 Hz), 148.1 (dd, *J*<sub>CF</sub> = 10.4, 10.4 Hz), 112.4 (t, *J*<sub>CF</sub> = 250.9 Hz), 104.2 (dd, *J*<sub>CF</sub> = 25.3, 23.7 Hz), 73.3, 63.1, 63.0, 61.9, 61.3, 20.7, 20.5, 20.3, 13.9. **<sup>19</sup>F NMR (CDCl<sub>3</sub>, CFCI<sub>3</sub>, 282 MHz)** δ -104.2 (d, *J*<sub>FF</sub> = 265.7 Hz), -105.3 (d, *J*<sub>FF</sub> = 265.7 Hz). **IR** (neat, cm<sup>-1</sup>) 2996, 1743, 1671, 1374, 1204, 1090, 1029. **HRMS** (ES<sup>+</sup>): calcd for [M+NH<sub>4</sub>]<sup>+</sup> C<sub>16</sub>H<sub>24</sub>F<sub>2</sub>NO<sub>9</sub>: 412.1419 found: 412.1418 (-0.2 ppm).  $[\alpha]_D^{20} = -13.2^\circ$  (c = 0.25, CHCl<sub>3</sub>).

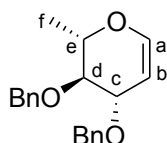

**3,4-di-O-benzyl-6-deoxy-L-glucal 1l.** To a solution of 3,4-di-O-acetyl-6-deoxy-L-glucal (1.5 g, 7 mmol) in MeOH (40 mL) was added K<sub>2</sub>CO<sub>3</sub> (39 mg, 0.28 mmol). After 12h at room temperature, the solvent was removed under vacuum. The viscous residue was dissolved in CHCl<sub>3</sub> and concentrated under vacuum. This procedure was repeated two times. DMF (25 mL) and TBAI (259 mg, 0.7 mmol) were added to the crude yellow solid and the solution was cooled to 0 °C. NaH (784 mg, 19.6 mmol, 60% in oil) was added portionwise over 30min. Then BnBr (2.33 mL, 19.6 mmol) was added dropwise at 0 °C and the mixture was allowed to warm up to room temperature. After 12h, the reaction mixture was quenched with sat. aq. NH<sub>4</sub>Cl (30 mL) and extracted with Et<sub>2</sub>O (3 x 30 mL). The combined organic layers were washed with water (2 x 30 mL), brine (2 x 20 mL) and dried over MgSO<sub>4</sub>. The solvent was removed under vacuum and the residue was purified by flash chromatography (cyclohexane/EtOAc 19: 1, *R<sub>f</sub>* = 0.40) to afford **1l** as a colorless oil in 78% yield (1.7 g).

**<sup>1</sup>H NMR (CDCl<sub>3</sub>, 300 MHz)** δ 7.39-7.29 (m, 10H, Bn), 6.38 (dd, 1H, H<sub>a</sub>, *J* = 6.2, 1.3 Hz), 4.92-4.87 (m, 2H, H<sub>b</sub>, Bn), 4.74-4.57 (m, 3H, Bn), 4.24 (ddd, 1H, H<sub>c</sub>, *J* = 6.4, 2.1, 1.3 Hz), 3.98 (dq, 1H, H<sub>e</sub>, *J* = 8.9, 6.4 Hz), 3.51 (dd, 1H, H<sub>d</sub>, *J* = 8.9, 6.4 Hz), 1.40 (d, 3H, H<sub>f</sub>, *J* = 6.4 Hz). **<sup>13</sup>C NMR (CDCl<sub>3</sub>, 75 MHz)** δ 144.8, 138.4, 138.2, 128.4 (4C), 128.0 (2C), 127.7 (2C), 127.6 (2C), 100.1, 79.5, 76.4, 74.1, 73.9, 70.5, 17.5. **IR** (neat, cm<sup>-1</sup>) 3035, 2870, 1644, 1453, 1237, 1098, 1057. **HRMS** (AP<sup>+</sup>): calcd for [M+Na]<sup>+</sup> C<sub>20</sub>H<sub>22</sub>O<sub>3</sub>Na: 333.1467 found: 333.1466 (-0.3 ppm).  $[\alpha]_D^{20} = +37.2^\circ$  (c = 0.25, CHCl<sub>3</sub>).

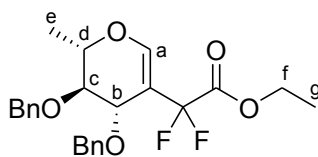

**1,5-anhydro-2,6-dideoxy-3,4-di-O-benzyl-2-(ethyl difluoro acetate)-L-arabino-hex-1-enitol 2l.** Prepared following the procedure **B** from 3,4-di-O-benzyl-6-deoxy-L-glucal **1l** using CuI (5 mg, 0.024 mmol) as a catalyst. Compound **2l** was obtained as a colorless oil in 51% yield (53 mg) after flash chromatography (SiO<sub>2</sub>, pentane/Et<sub>2</sub>O 19: 1, *R<sub>f</sub>* = 0.27).

**<sup>1</sup>H NMR (CDCl<sub>3</sub>, 300 MHz)** δ 7.39-7.29 (m, 10H, Bn), 6.93 (d, 1H, H<sub>a</sub>, *J*<sub>HF</sub> = 2.6 Hz), 4.68-4.56 (m, 4H, Bn), 4.41-4.30 (m, 1H, H<sub>d</sub>), 4.17-4.16 (m, 1H, H<sub>b</sub>), 4.14-3.97 (m, 2H, H<sub>f</sub>), 3.59 (t, 1H, H<sub>c</sub>, *J*<sub>HH</sub> = 4.3 Hz), 1.39 (d, 3H, H<sub>e</sub>, *J*<sub>HH</sub> = 6.8 Hz), 1.15 (t, 3H, H<sub>g</sub>, *J*<sub>HH</sub> = 7.2 Hz). **<sup>13</sup>C NMR (CDCl<sub>3</sub>, 75 MHz)** δ 163.7 (dd, *J*<sub>CF</sub> = 38.5, 34.1 Hz), 146.0 (dd, *J*<sub>CF</sub> = 12.7, 8.8 Hz), 137.4, 137.0, 128.1 (2C), 127.8 (2C), 127.6, 127.4 (2C), 127.3 (2C), 127.2, 113.2 (t, *J*<sub>CF</sub> = 249.8 Hz), 105.1 (dd, *J*<sub>CF</sub> = 26.4, 21.5 Hz), 76.0, 73.3, 72.2, 72.1, 70.5 (d, *J*<sub>CF</sub> = 3.9 Hz), 62.2, 15.9, 13.3. **<sup>19</sup>F NMR (CDCl<sub>3</sub>, CFCl<sub>3</sub>, 282 MHz)** δ -103.1 (d, *J*<sub>FF</sub> = 256.5 Hz), -109.6 (d, *J*<sub>FF</sub> = 256.5 Hz). **IR** (neat, cm<sup>-1</sup>) 2986, 2870, 1762, 1661, 1455, 1212, 1202, 1066. **HRMS** (AP<sup>+</sup>): calcd for [M+NH<sub>4</sub>]<sup>+</sup> C<sub>24</sub>H<sub>30</sub>F<sub>2</sub>NO<sub>5</sub>: 450.2092 found: 450.2096 (+0.9 ppm). [ $\alpha$ ]<sub>D</sub><sup>20</sup> = +51.2° (c = 0.25, CHCl<sub>3</sub>).

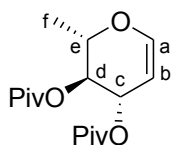

**3,4-di-O-pivaloyl-6-deoxy-L-glucal 1m.** To a solution of 3,4-di-O-acetyl-6-deoxy-L-glucal (1.5 g, 7 mmol) in MeOH (40 mL) was added K<sub>2</sub>CO<sub>3</sub> (39 mg, 0.28 mmol). After 12h at room temperature, the solvent was removed under vacuum. The viscous residue was dissolved in CHCl<sub>3</sub> and concentrated under vacuum. This procedure was repeated two times. The crude yellow solid was dissolved in THF (50 mL) and cooled to 0 °C. DMAP (3.4 g, 28 mmol) and PivCl (3.4 mL, 28 mmol) were added. The suspension was allowed to warm up to room temperature. After 12h, the reaction mixture was diluted with water (40 mL) and DCM (40 mL). The aqueous phase was extracted with DCM (2 x 40 mL). The combined organic phases were washed with brine (40 mL) and dried over MgSO<sub>4</sub>. The solvent was removed under vacuum and the residue was purified by flash chromatography (cyclohexane/EtOAc 19: 1, *R<sub>f</sub>* = 0.37) to afford **1m** as a white solid in 57% yield (1.2 g).

**<sup>1</sup>H NMR (CDCl<sub>3</sub>, 300 MHz)** δ 6.43 (dd, 1H, H<sub>a</sub>, *J* = 6.0, 1.1 Hz), 5.36 (ddd, 1H, H<sub>c</sub>, *J* = 6.6, 2.8, 1.1 Hz), 5.09 (dd, 1H, H<sub>d</sub>, *J* = 8.7, 6.6 Hz), 4.75 (dd, 1H, H<sub>b</sub>, *J* = 6.0, 2.8 Hz), 4.11 (dq, 1H, H<sub>e</sub>, *J* = 8.7, 6.6 Hz), 1.30 (d, 3H, H<sub>f</sub>, *J* = 6.6 Hz), 1.20 (s, 9H, Piv), 1.18 (s, 9H, Piv). **<sup>13</sup>C NMR (CDCl<sub>3</sub>, 75 MHz)** δ 178.0, 177.1, 145.8, 99.2, 72.7, 71.3, 68.4, 38.74, 38.69, 27.0 (6C), 16.6. **IR** (neat, cm<sup>-1</sup>) 2970, 1739, 1717, 1649, 1481, 1237, 1134, 1042. **HRMS** (ES<sup>+</sup>): calcd for [M+NH<sub>4</sub>]<sup>+</sup> C<sub>16</sub>H<sub>30</sub>NO<sub>5</sub>: 316.2124 found: 316.2119 (-1.6 ppm). [ $\alpha$ ]<sub>D</sub><sup>20</sup> = +63.6° (c = 0.25, CHCl<sub>3</sub>). Mp: 58-59°C.

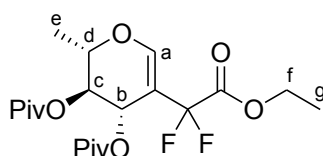

**1,5-anhydro-2,6-dideoxy-3,4-di-O-pivaloyl-2-(ethyl difluoro acetate)-L-arabino-hex-1-enitol 2m.** Prepared following the procedure **B** from 3,4-di-O-pivaloyl-6-deoxy-L-glucal **1m** except that the reaction mixture was heated at 110 °C for 30h instead of 24h. Compound **2m** was obtained as a colorless oil in 50% yield (50 mg) after flash chromatography (SiO<sub>2</sub>, pentane/Et<sub>2</sub>O 9: 1, *R<sub>f</sub>* = 0.34).

**<sup>1</sup>H NMR (CDCl<sub>3</sub>, 300 MHz)** δ 7.06 (brs, 1H, H<sub>a</sub>), 5.55 (d, 1H, H<sub>b</sub>, *J<sub>HH</sub>* = 3.9 Hz), 4.94 (t, 1H, H<sub>c</sub>, *J<sub>HH</sub>* = 3.9 Hz), 4.38-4.33 (m, 1H, H<sub>d</sub>), 4.31 (q, 2H, H<sub>f</sub>, *J<sub>HH</sub>* = 7.2 Hz), 1.38 (d, 3H, H<sub>e</sub>, *J<sub>HH</sub>* = 6.4 Hz), 1.35 (t, 3H, H<sub>g</sub>, *J<sub>HH</sub>* = 7.2 Hz), 1.18 (s, 18H, Piv). **<sup>13</sup>C NMR (CDCl<sub>3</sub>, 75 MHz)** δ 176.9, 176.8, 163.3 (t, *J<sub>CF</sub>* = 35.8 Hz), 149.1 (dd, *J<sub>CF</sub>* = 11.0, 9.4 Hz), 113.2 (t, *J<sub>CF</sub>* = 250.9 Hz), 103.1 (dd, *J<sub>CF</sub>* = 25.9, 24.2 Hz), 72.6, 69.7, 63.1, 62.7 (t, *J<sub>CF</sub>* = 2.2 Hz), 38.77, 38.75, 26.91 (3C), 26.87 (3C), 15.9, 13.9. **<sup>19</sup>F NMR (CDCl<sub>3</sub>, CFCl<sub>3</sub>, 282 MHz)** δ -100.2 (d, *J<sub>FF</sub>* = 263.6 Hz), -104.6 (d, *J<sub>FF</sub>* = 263.6 Hz). **IR** (neat, cm<sup>-1</sup>) 2978, 2880, 1773, 1737, 1277, 1132. **HRMS (ES<sup>+</sup>):** calcd for [M+NH<sub>4</sub>]<sup>+</sup> C<sub>20</sub>H<sub>34</sub>F<sub>2</sub>NO<sub>7</sub>: 438.2303 found: 438.2299 (-0.9 ppm).  $[\alpha]_D^{20} = +24.4^\circ$  (c = 0.80, CHCl<sub>3</sub>).

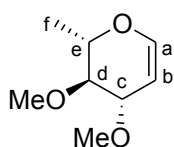

**3,4-di-O-methyl-6-deoxy-L-glucal 1n.** To a solution of 3,4-di-O-acetyl-6-deoxy-L-glucal (1.5 g, 7.0 mmol) in MeOH (40 mL) was added K<sub>2</sub>CO<sub>3</sub> (39 mg, 0.28 mmol). After 12h at room temperature, the solvent was removed under vacuum. The viscous residue was dissolved in CHCl<sub>3</sub> and concentrated under vacuum. This procedure was repeated two times. DMF (30 mL) was added to the crude yellow solid and the solution was cooled to 0 °C. NaH (616 mg, 15.4 mmol, 60% in oil) was added portionwise over 30min. Then, MeI (0.96 mL, 15.4 mmol) was added dropwise at 0 °C and the mixture was allowed to warm up to room temperature. After 12h, the reaction mixture was quenched with MeOH (10 mL), stirred for 15min and extracted with EtOAc (3 x 30 mL). The combined organic layers were washed with water (2 x 30 mL), brine (2 x 30 mL) and dried over MgSO<sub>4</sub>. The solvent was removed under vacuum and the residue was purified by flash chromatography (cyclohexane/EtOAc 19: 1, *R<sub>f</sub>* = 0.33) to afford **1n** as a colorless oil in 23% yield (255 mg).

**<sup>1</sup>H NMR (CDCl<sub>3</sub>, 300 MHz)** δ 6.35 (dd, 1H, H<sub>a</sub>, *J* = 6.2, 1.1 Hz), 4.82 (dd, 1H, H<sub>b</sub>, *J* = 6.2, 2.5 Hz), 3.94-3.85 (m, 2H, H<sub>c,e</sub>), 3.57 (s, 3H, Me), 3.41 (s, 3H, Me), 3.14 (dd, 1H, H<sub>d</sub>, *J* = 8.7, 6.4 Hz), 1.37 (d, 3H, H<sub>f</sub>, *J* = 6.4 Hz). **<sup>13</sup>C NMR (CDCl<sub>3</sub>, 75 MHz)** δ 144.5, 99.5, 81.0, 77.3, 73.4, 59.4, 55.5, 17.0. **IR** (neat, cm<sup>-1</sup>) 2934, 1646, 1236, 1104, 1088, 1054. **Elemental analysis:** calcd for C<sub>8</sub>H<sub>14</sub>O<sub>3</sub>: C, 60.74; H, 8.92. found: C, 60.56; H, 8.80. **MS (IE):** calcd for [M]<sup>+</sup> C<sub>8</sub>H<sub>14</sub>O<sub>3</sub>: 158 found: 158.  $[\alpha]_D^{20} = +36.8^\circ$  (c = 0.25, CHCl<sub>3</sub>).

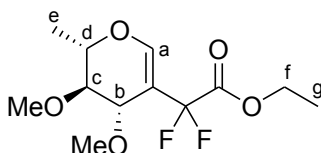

**1,5-anhydro-2,6-dideoxy-3,4-di-O-methyl-2-(ethyl difluoro acetate)-L-arabino-hex-1-enitol 2n.** Prepared following the procedure **B** from 3,4-di-O-methyl-6-deoxy-L-glucal **1n**. Compound **2n** was obtained as a colorless oil in 60% yield (40 mg) after flash chromatography (SiO<sub>2</sub>, pentane/Et<sub>2</sub>O 9: 1, *R<sub>f</sub>* = 0.31).

**<sup>1</sup>H NMR (CDCl<sub>3</sub>, 300 MHz)** δ 6.85 (d, 1H, H<sub>a</sub>, *J*<sub>HF</sub> = 2.8 Hz), 4.36-4.16 (m, 3H, H<sub>d,f</sub>), 3.84 (d, 1H, H<sub>b</sub>, *J*<sub>HH</sub> = 4.3 Hz), 3.51 (s, 3H, Me), 3.41 (s, 3H, Me), 3.28 (t, 1H, H<sub>c</sub>, *J*<sub>HH</sub> = 4.3 Hz), 1.37 (d, 3H, H<sub>e</sub>, *J*<sub>HH</sub> = 6.8 Hz), 1.33 (t, 3H, H<sub>g</sub>, *J*<sub>HH</sub> = 7.0 Hz). **<sup>13</sup>C NMR (CDCl<sub>3</sub>, 75 MHz)** δ 164.6 (dd, *J*<sub>CF</sub> = 38.5, 33.6 Hz), 146.6 (dd, *J*<sub>CF</sub> = 12.7, 9.4 Hz), 114.0 (t, *J*<sub>CF</sub> = 249.8 Hz), 106.5 (dd, *J*<sub>CF</sub> = 26.4, 20.9 Hz), 79.9, 74.0, 73.8 (d, *J*<sub>CF</sub> = 3.9 Hz), 63.0, 59.1, 58.7, 16.6, 14.3. **<sup>19</sup>F NMR (CDCl<sub>3</sub>, CFCl<sub>3</sub>, 282 MHz)** δ -102.9 (d, *J*<sub>FF</sub> = 256.5 Hz), -110.3 (d, *J*<sub>FF</sub> = 256.5 Hz). **IR** (neat, cm<sup>-1</sup>) 2989, 2939, 1764, 1667, 1287, 1195, 1083. **HRMS** (ES<sup>+</sup>): calcd for [M+NH<sub>4</sub>]<sup>+</sup> C<sub>12</sub>H<sub>22</sub>F<sub>2</sub>NO<sub>5</sub>: 298.1463 found: 298.1466 (+1.0 ppm). [ $\alpha$ ]<sub>D</sub><sup>20</sup> = -55.0° (c = 0.30, CHCl<sub>3</sub>).

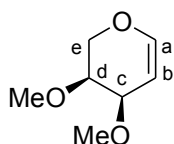

**3,4-di-O-methyl-L-arabinal 1o.** To a solution of 3,4-di-O-acetyl-L-arabinal (1.5 g, 7.5 mmol) in MeOH (35 mL) was added K<sub>2</sub>CO<sub>3</sub> (41 mg, 0.30 mmol). After 12h at room temperature, the solvent was removed under vacuum. The viscous residue was dissolved in CHCl<sub>3</sub> and concentrated under vacuum. This procedure was repeated two times. DMF (35 mL) was added to the crude yellow solid and the solution was cooled to 0 °C. NaH (656 mg, 16.4 mmol, 60% in oil) was added portionwise over 30min. Then, MeI (1.0 mL, 16.4 mmol) was added dropwise at 0 °C and the mixture was allowed to warm up to room temperature. After 12h, the reaction mixture was quenched with MeOH (10 mL), stirred for 15min and extracted with EtOAc (3 x 30 mL). The combined organic layers were washed with water (2 x 30 mL), brine (2 x 30 mL) and dried over MgSO<sub>4</sub>. The solvent was removed under vacuum and the residue was purified by flash chromatography (cyclohexane/EtOAc 9: 1, *R<sub>f</sub>* = 0.22) to afford **1o** as a colorless oil in 23% yield (251 mg).

**<sup>1</sup>H NMR (CDCl<sub>3</sub>, 300 MHz)** δ 6.37 (d, 1H, H<sub>a</sub>, *J* = 6.0 Hz), 4.88 (dd, 1H, H<sub>b</sub>, *J* = 6.0, 3.8 Hz), 3.96-3.88 (m, 2H, H<sub>e</sub>), 3.85 (t, 1H, H<sub>c</sub>, *J* = 3.8 Hz), 3.54 (ddd, 1H, H<sub>d</sub>, *J* = 9.4, 4.5, 3.8 Hz), 3.43 (s, 3H, Me), 3.40 (s, 3H, Me). **<sup>13</sup>C NMR (CDCl<sub>3</sub>, 75 MHz)** δ 146.5, 98.2, 75.2, 68.9, 62.7, 57.0, 56.2. **IR** (neat, cm<sup>-1</sup>) 2932, 2888, 1639, 1235, 1121, 1070. **Elemental analysis:** calcd for C<sub>7</sub>H<sub>12</sub>O<sub>3</sub>: C, 58.32; H, 8.39. found: C, 58.50; H, 8.53. **MS** (IE): calcd for [M]<sup>+</sup> C<sub>7</sub>H<sub>12</sub>O<sub>3</sub>: 144 found: 144. [ $\alpha$ ]<sub>D</sub><sup>20</sup> = -245.2° (c = 0.25, CHCl<sub>3</sub>).

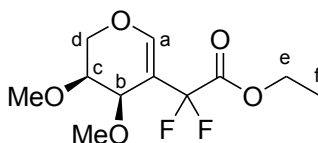

**1,5-anhydro-2,3-di-O-methyl-4-deoxy-4-(ethyl difluoro acetate)-D-erythro-pent-4-enitol 2o.** Prepared following the procedure **B** from 3,4-di-O-methyl-L-arabinal **1o** using CuI (5 mg, 0.024 mmol) as a catalyst. Compound **2o** was obtained as a colorless oil in 39% yield (25 mg) after flash chromatography (SiO<sub>2</sub>, pentane/Et<sub>2</sub>O 4: 1, *R<sub>f</sub>* = 0.37).

**<sup>1</sup>H NMR (CDCl<sub>3</sub>, 300 MHz)** δ 6.89 (d, 1H, H<sub>a</sub>, *J*<sub>HF</sub> = 2.6 Hz), 4.38-4.27 (m, 2H, H<sub>e</sub>), 4.10-3.92 (m, 3H, H<sub>b,d</sub>), 3.55 (ddd, 1H, H<sub>c</sub>, *J*<sub>HH</sub> = 11.1, 4.2, 3.2 Hz), 3.50 (s, 3H, Me), 3.49 (s, 3H, Me), 1.35 (t, 3H, H<sub>f</sub>, *J*<sub>HH</sub> = 7.2 Hz). **<sup>13</sup>C NMR (CDCl<sub>3</sub>, 75 MHz)** δ 164.1 (dd, *J*<sub>CF</sub> = 37.4, 34.1 Hz), 148.5 (dd, *J*<sub>CF</sub> = 12.1, 9.4 Hz), 113.1 (dd, *J*<sub>CF</sub> = 250.9, 249.8 Hz), 106.4 (dd, *J*<sub>CF</sub> = 27.0, 23.1 Hz), 76.1, 68.2 (d, *J*<sub>CF</sub> = 3.3 Hz), 62.9, 62.5, 59.9, 57.7, 13.9. **<sup>19</sup>F NMR (CDCl<sub>3</sub>, CFCI<sub>3</sub>, 282 MHz)** δ -101.3 (d, *J*<sub>FF</sub> = 251.4 Hz), -108.2 (d, *J*<sub>FF</sub> = 251.4 Hz). **IR** (neat, cm<sup>-1</sup>) 2933, 1765, 1660, 1295, 1209, 1079. **HRMS** (ES<sup>+</sup>): calcd for [M+NH<sub>4</sub>]<sup>+</sup> C<sub>11</sub>H<sub>20</sub>F<sub>2</sub>NO<sub>5</sub>: 284.1310 found: 284.1314 (+1.4 ppm). [ $\alpha$ ]<sub>D</sub><sup>20</sup> = -80.1° (c = 0.45, CHCl<sub>3</sub>).

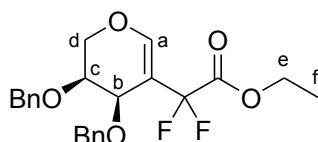

**1,5-anhydro-2,3-di-O-benzyl-4-deoxy-4-(ethyl difluoro acetate)-D-erythro-pent-4-enitol 2p.** Prepared following the procedure **B** from 3,4-di-O-benzyl-L-arabinal **1p** using CuI (5 mg, 0.024 mmol) as a catalyst. Compound **2p** was obtained as a colorless oil in 42% yield (42 mg) after flash chromatography (SiO<sub>2</sub>, pentane/Et<sub>2</sub>O 19: 1, *R<sub>f</sub>* = 0.18).

**<sup>1</sup>H NMR (CDCl<sub>3</sub>, 300 MHz)** δ 7.40-7.28 (m, 10H, Bn), 6.90 (d, 1H, H<sub>a</sub>, *J*<sub>HF</sub> = 2.8 Hz), 4.98-4.59 (m, 4H, Bn), 4.32 (d, 1H, H<sub>b</sub>, *J*<sub>HH</sub> = 2.3 Hz), 4.18-4.06 (m, 4H, H<sub>d,e</sub>), 3.81 (ddd, 1H, H<sub>c</sub>, *J*<sub>HH</sub> = 10.6, 4.9, 2.3 Hz), 1.21 (t, 3H, H<sub>f</sub>, *J*<sub>HH</sub> = 7.2 Hz). **<sup>13</sup>C NMR (CDCl<sub>3</sub>, 75 MHz)** δ 164.0 (dd, *J*<sub>CF</sub> = 38.0, 34.1 Hz), 148.6 (dd, *J*<sub>CF</sub> = 12.1, 8.8 Hz), 138.4, 137.6, 128.6 (2C), 128.1 (2C), 128.0 (2C), 127.47 (2C), 127.45 (2C), 113.1 (dd, *J*<sub>CF</sub> = 250.9, 248.7 Hz), 106.4 (dd, *J*<sub>CF</sub> = 26.4, 22.6 Hz), 74.1, 74.0, 71.7 (2C), 67.2 (d, *J*<sub>CF</sub> = 3.9 Hz), 62.8, 13.8. **<sup>19</sup>F NMR (CDCl<sub>3</sub>, CFCI<sub>3</sub>, 282 MHz)** δ -101.0 (d, *J*<sub>FF</sub> = 251.4 Hz), -108.1 (d, *J*<sub>FF</sub> = 251.4 Hz). **IR** (neat, cm<sup>-1</sup>) 2923, 1767, 1659, 1296, 1199, 1084. **HRMS** (ES<sup>+</sup>): calcd for [M+NH<sub>4</sub>]<sup>+</sup> C<sub>23</sub>H<sub>28</sub>F<sub>2</sub>NO<sub>5</sub>: 436.1936 found: 436.1939 (+0.7 ppm). [ $\alpha$ ]<sub>D</sub><sup>20</sup> = -124.2° (c = 0.45, CHCl<sub>3</sub>).

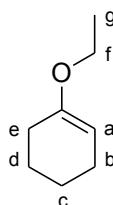

**1-ethoxycyclohex-1-ene 4.** At -20 °C, TMSOTf (11.5 mL, 63.8 mmol) was added dropwise to a solution of cyclohexanone diethyl acetal (10.0 g, 58.1 mmol) and *N,N*-diisopropylethylamine (12.1 mL, 69.7 mmol) in DCM (100 mL). The reaction mixture was allowed to warm to room temperature and stirred for 3 days. Aqueous sodium hydroxide

solution (1 N, 11.6 mmol) was added and the reaction mixture was stirred vigorously for 5 minutes. The organic layer was separated, diluted with pentane (200 mL) and cooled overnight. The precipitate was removed by filtration. The solvent was removed under vacuum and the residue was distilled (110 °C, 12 mmHg) to afford **4** as a colorless oil in 44% yield (3.2 g).

**<sup>1</sup>H NMR (CDCl<sub>3</sub>, 300 MHz)** δ 4.60 (t, 1H, H<sub>a</sub>, *J* = 3.2 Hz), 3.69 (q, 2H, H<sub>f</sub>, *J* = 7.0 Hz), 2.08-2.02 (m, 4H, H<sub>b,e</sub>), 1.72-1.62 (m, 2H, H<sub>c</sub> or d), 1.58-1.50 (m, 2H, H<sub>c</sub> or d), 1.29 (t, 3H, H<sub>g</sub>, *J* = 7.0 Hz). **<sup>13</sup>C NMR (CDCl<sub>3</sub>, 75 MHz)** δ 154.4, 93.3, 61.3, 27.8, 23.4, 22.8, 22.7, 15.5. **IR** (neat, cm<sup>-1</sup>) 2935, 2864, 1721, 1658, 1450, 1381, 1185, 1112, 1049. **HRMS** (EI): calcd for [M] C<sub>8</sub>H<sub>14</sub>O: 126.1045 found: 126.1048 (+2.4 ppm).

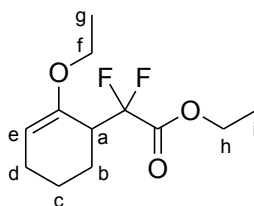

**1-ethoxy-6-(ethyl difluoro acetate)-cyclohex-1-ene 5.** Prepared following the procedure **B** from enol ether **4** except that the reaction mixture was heated at 80 °C for 4h. Compound **5** was obtained as a colorless oil in 34% yield (20 mg) after flash chromatography (SiO<sub>2</sub>, pentane/Et<sub>2</sub>O 49: 1, *R<sub>f</sub>* = 0.35).

**<sup>1</sup>H NMR (CDCl<sub>3</sub>, 300 MHz)** δ 4.83-4.80 (m, 1H, H<sub>e</sub>), 4.29 (q, 2H, H<sub>h</sub>, *J<sub>HH</sub>* = 7.2 Hz), 3.71-3.56 (m, 2H, H<sub>f</sub>), 3.28-3.11 (m, 1H, H<sub>a</sub>), 2.18-2.04 (m, 2H, H<sub>d</sub>), 1.94-1.74 (m, 3H, H<sub>b,c</sub>), 1.56-1.44 (m, 1H, H<sub>c</sub>), 1.36 (t, 3H, H<sub>i</sub>, *J<sub>HH</sub>* = 7.2 Hz), 1.19 (t, 3H, H<sub>g</sub>, *J<sub>HH</sub>* = 7.0 Hz). **<sup>13</sup>C NMR (CDCl<sub>3</sub>, 75 MHz)** δ 164.0 (dd, *J<sub>CF</sub>* = 34.1, 30.8 Hz), 148.7 (d, *J<sub>CF</sub>* = 9.9 Hz), 115.4 (dd, *J<sub>CF</sub>* = 258.0, 245.9 Hz), 97.7, 61.75, 61.68, 41.3 (dd, *J<sub>CF</sub>* = 24.8, 22.6 Hz), 22.7, 21.1 (dd, *J<sub>CF</sub>* = 6.1, 1.7 Hz), 20.1, 13.6, 13.5. **<sup>19</sup>F NMR (CDCl<sub>3</sub>, CFCl<sub>3</sub>, 282 MHz)** δ -108.3 (d, *J<sub>FF</sub>* = 253.4 Hz), -119.9 (d, *J<sub>FF</sub>* = 253.4 Hz). **IR** (neat, cm<sup>-1</sup>) 2983, 2926, 1773, 1760, 1667, 1285, 1209, 1037. **HRMS** (ESI+): calcd for [M] C<sub>12</sub>H<sub>18</sub>F<sub>2</sub>O<sub>3</sub>: 248.1224 found: 248.1226 (+0.8 ppm).

## Elucidation of the difluoromethylene moiety's position in the glycal skeleton

The structure of 1,5-anhydro-3,4,6-tri-O-(p-methoxybenzyl)-2-deoxy-2-(ethyl difluoroacetate)-D-*arabino*-hex-1-enitol **2e** was established by NMR studies. Assignment of resonances for protons and carbons given in the list of spectral data were deduced from 1D NMR ( $^1\text{H}$ ,  $^{13}\text{C}$  and  $^{13}\text{C}$ -JMOD) and 2D NMR (COSY, HMQC and HMBC) spectra. Subsequent long range C-H correlation by HMBC experiment was helpful in establishing the position of the difluoromethylene moiety in the glycal skeleton. Indeed, significant long range coupling between  $\text{H}_a$  with  $\text{C}_b$  and  $\text{C}_d$  of glycal skeleton had confirmed the formation of the *b*-adduct: the C2- $\text{CF}_2\text{CO}_2\text{Et}$  glycal derivative.

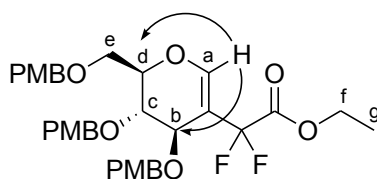

**Figure 1.** Elucidation of the difluoromethylene moiety's position in the glycal skeleton by NMR spectroscopy



## Section D: Copies of $^1\text{H}$ , $^{19}\text{F}$ and $^{13}\text{C}$ NMR spectra

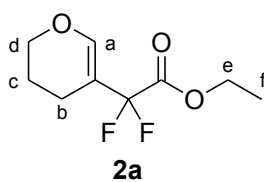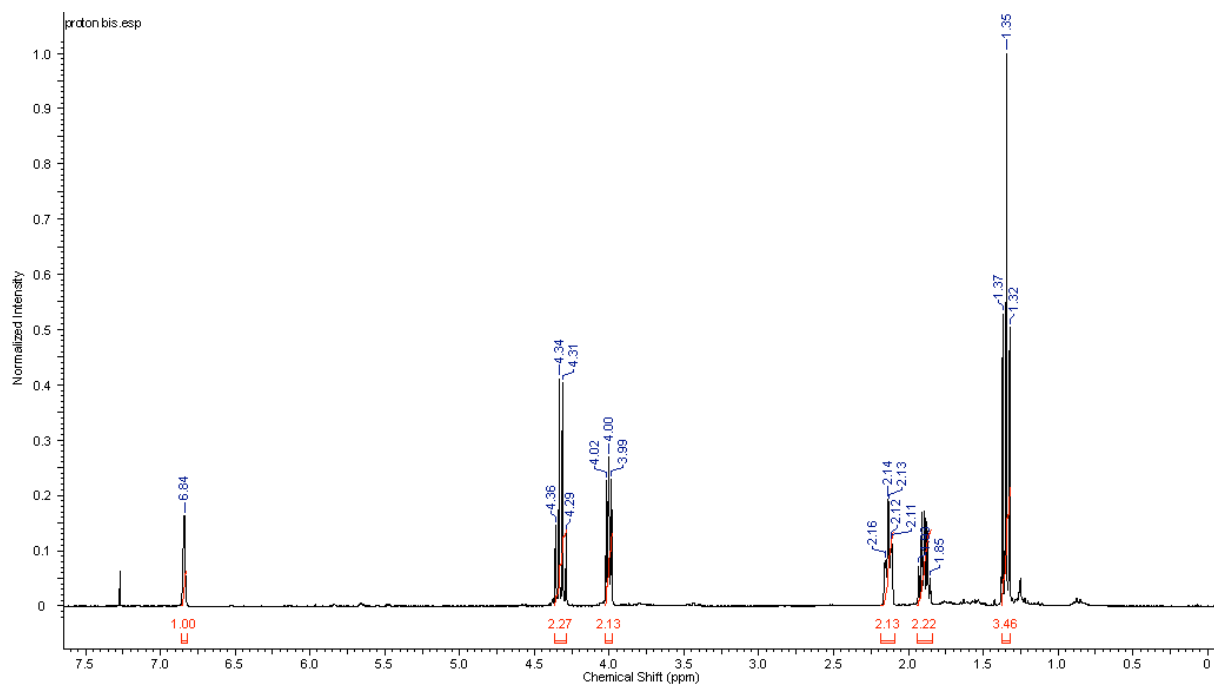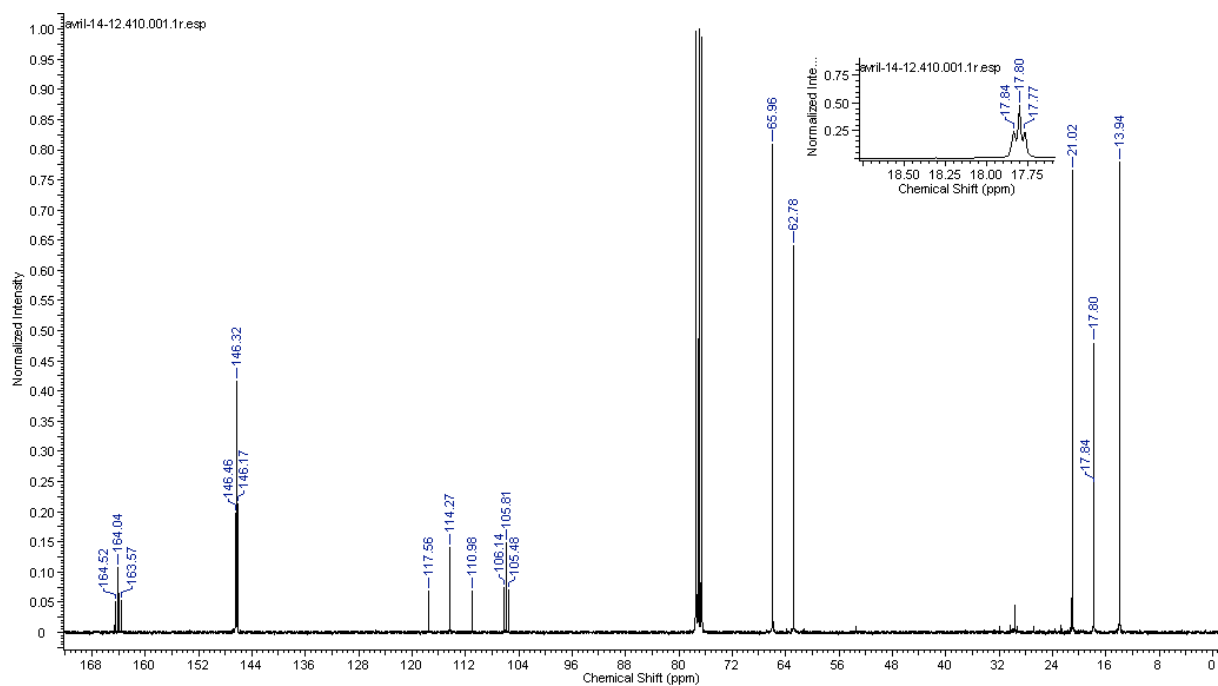

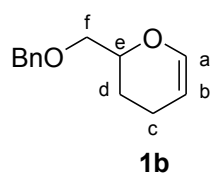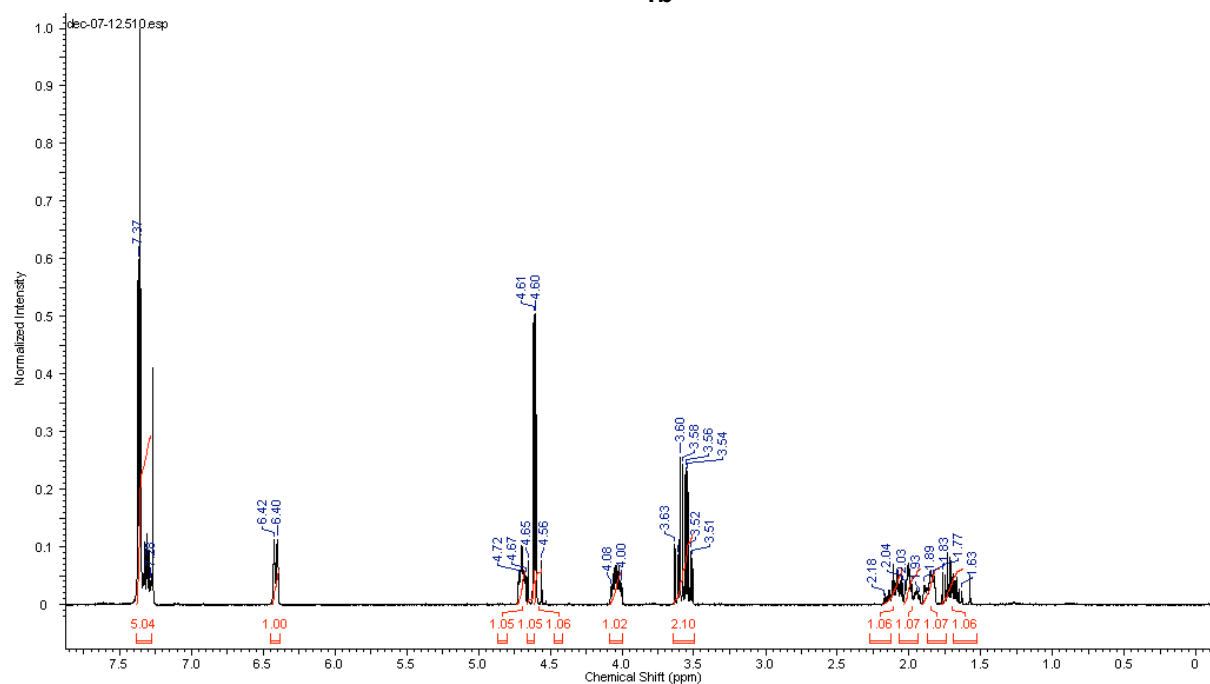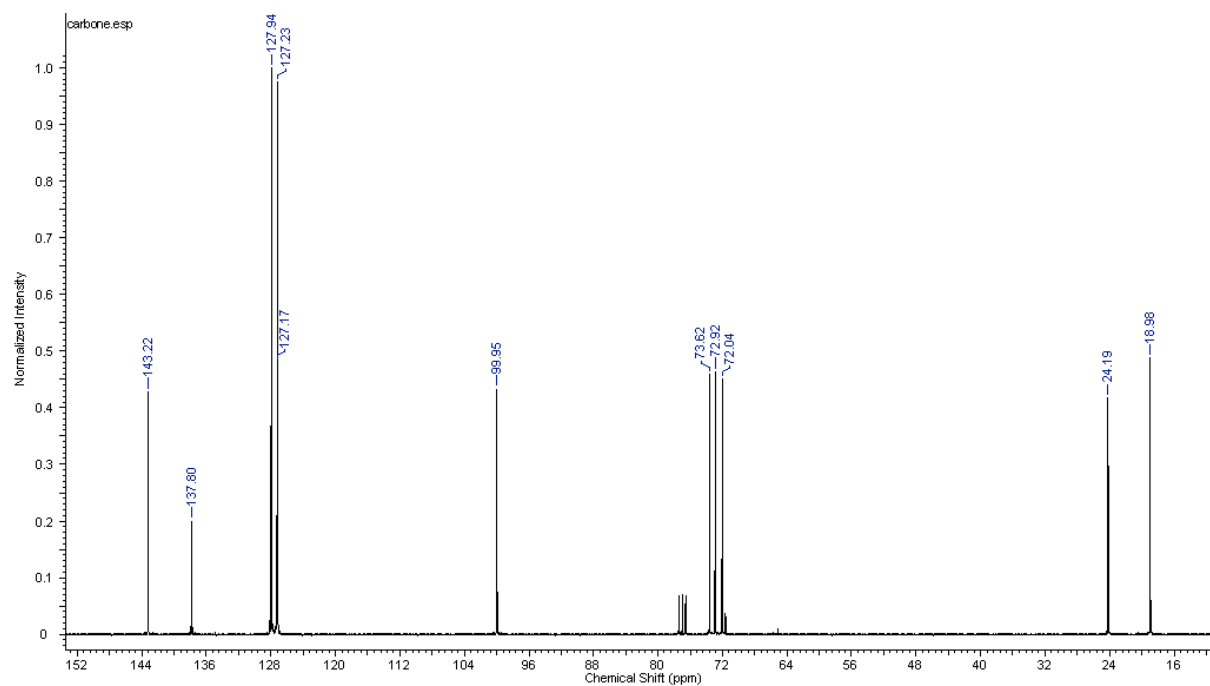

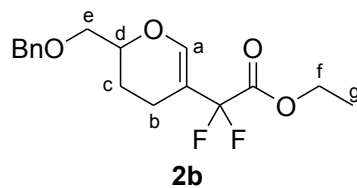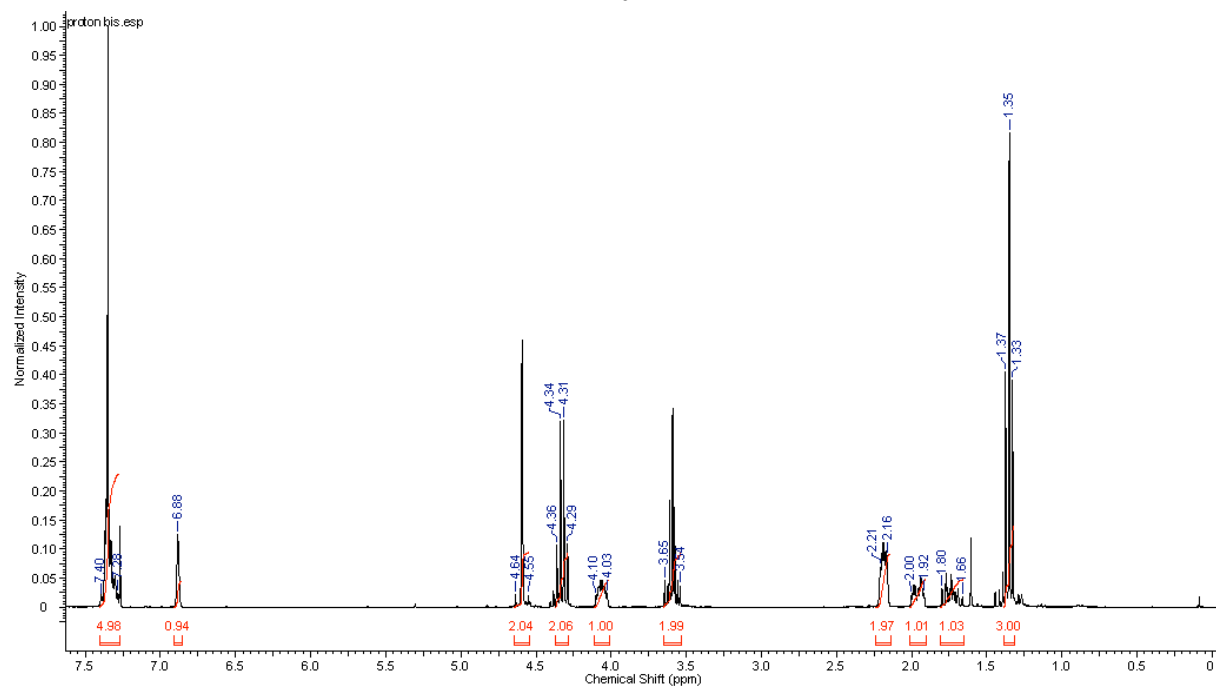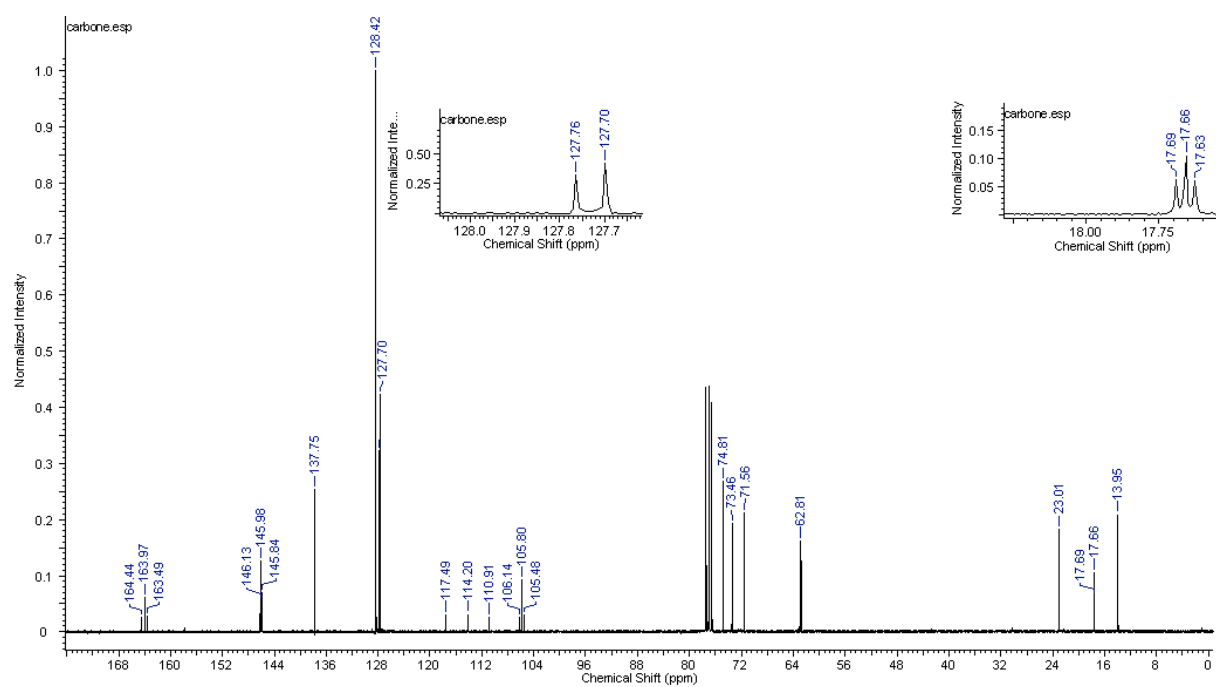

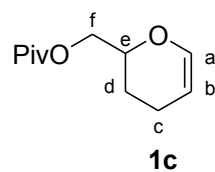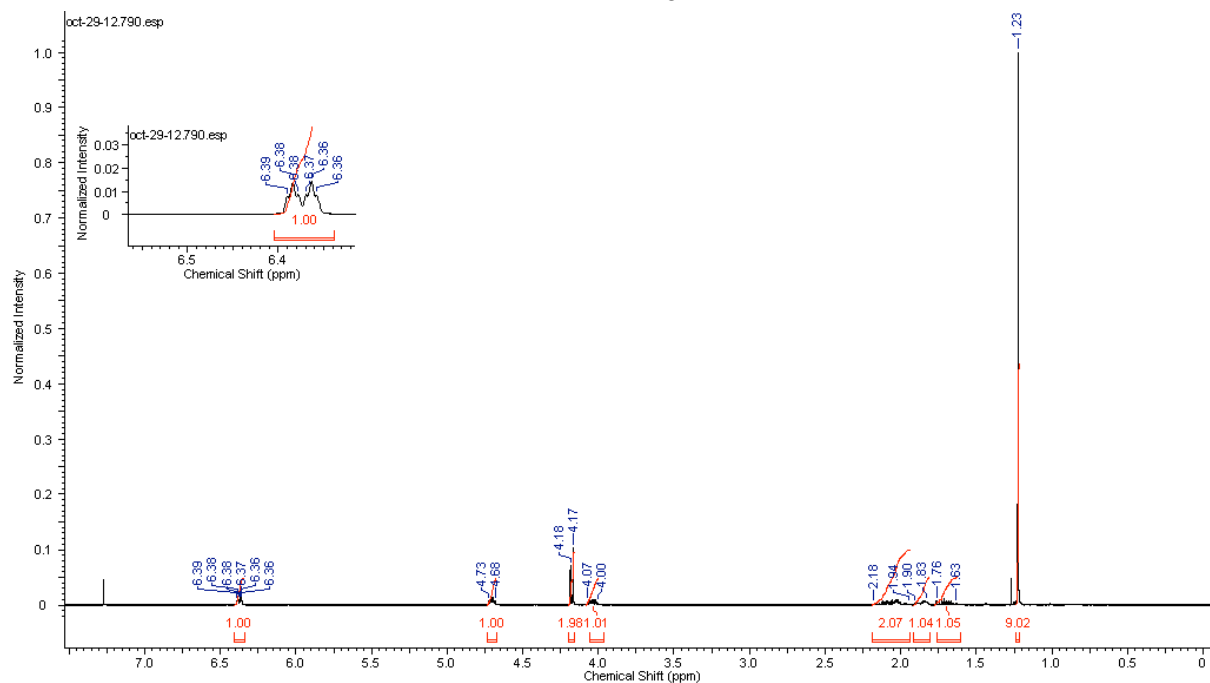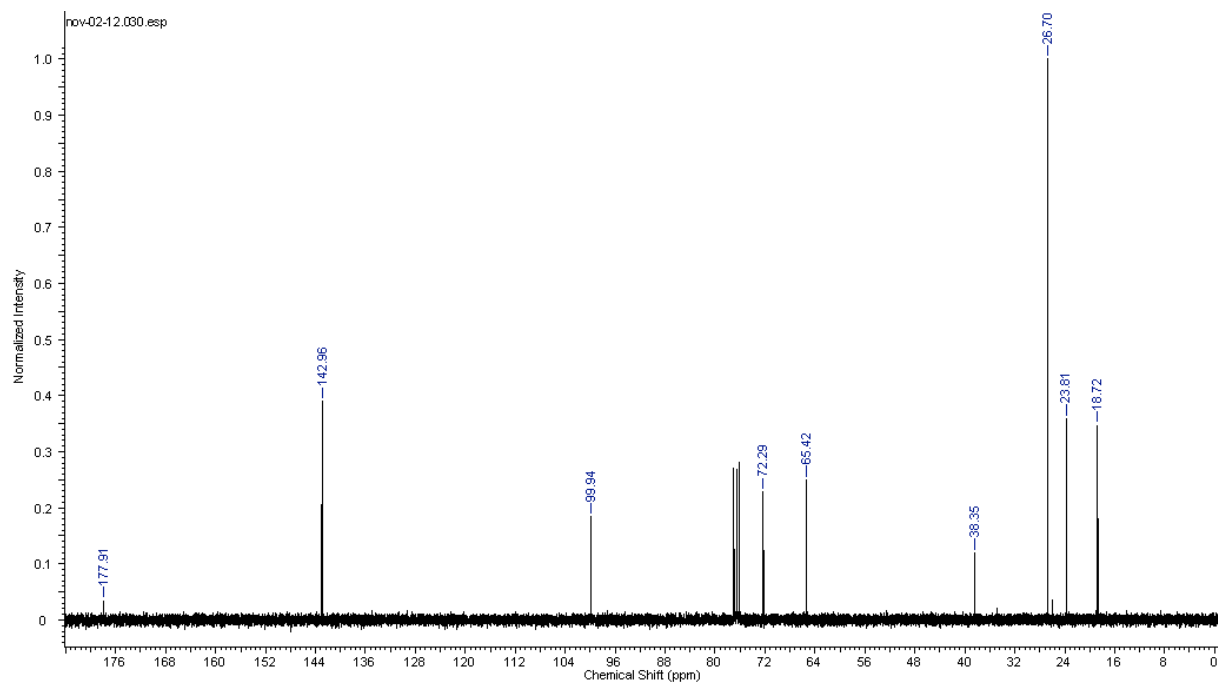

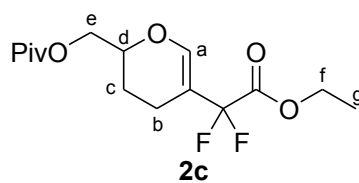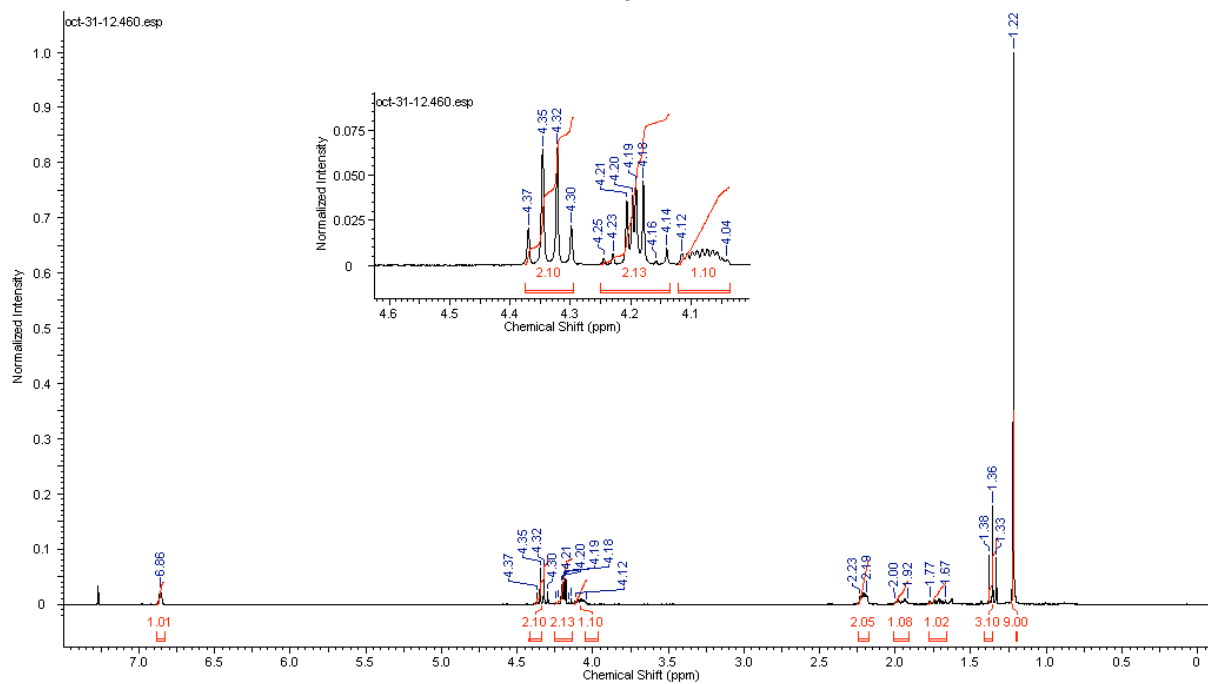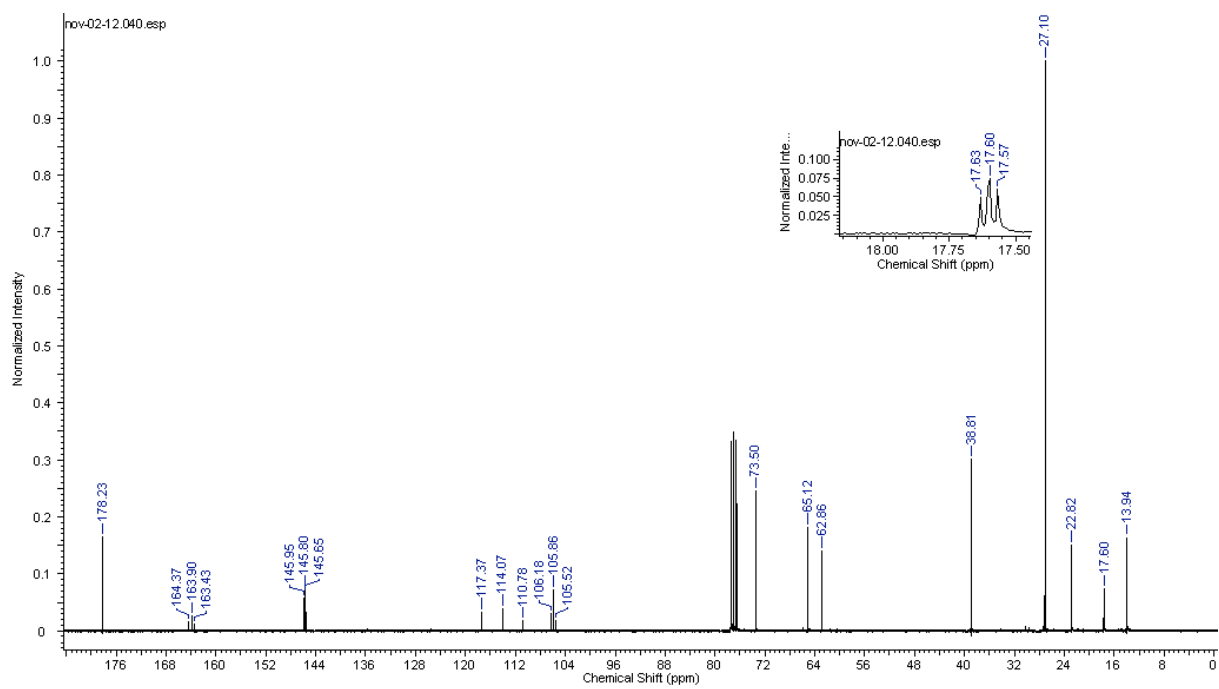

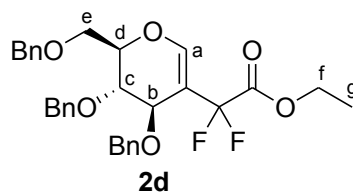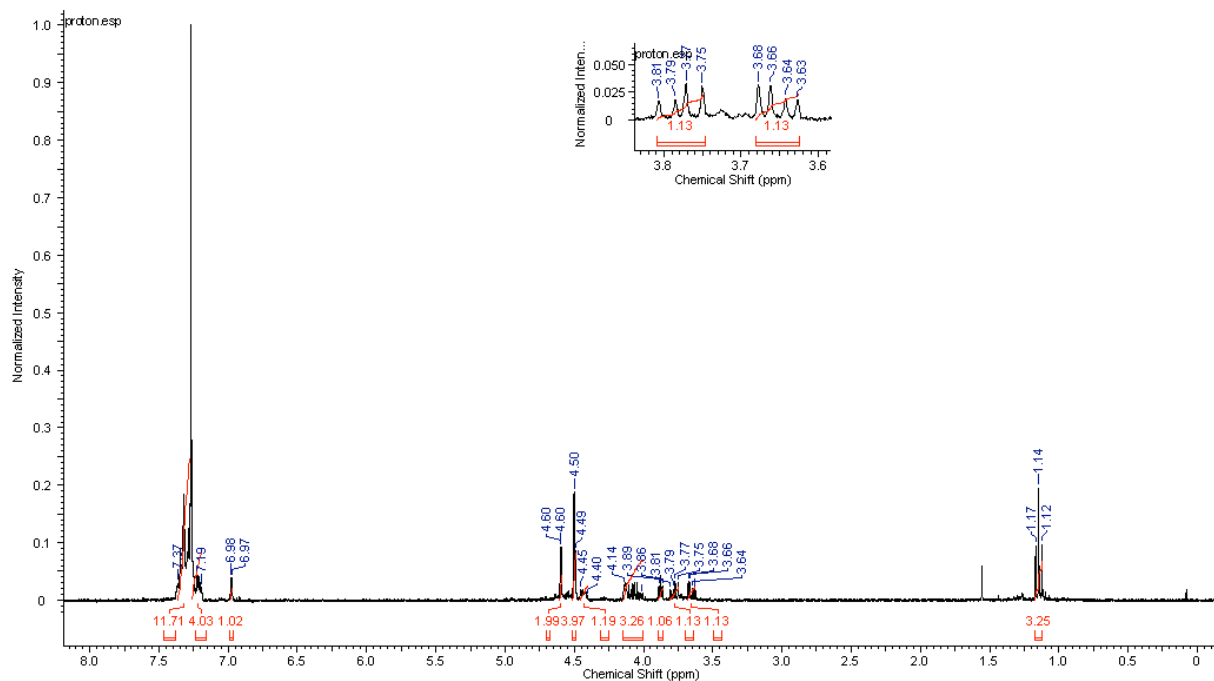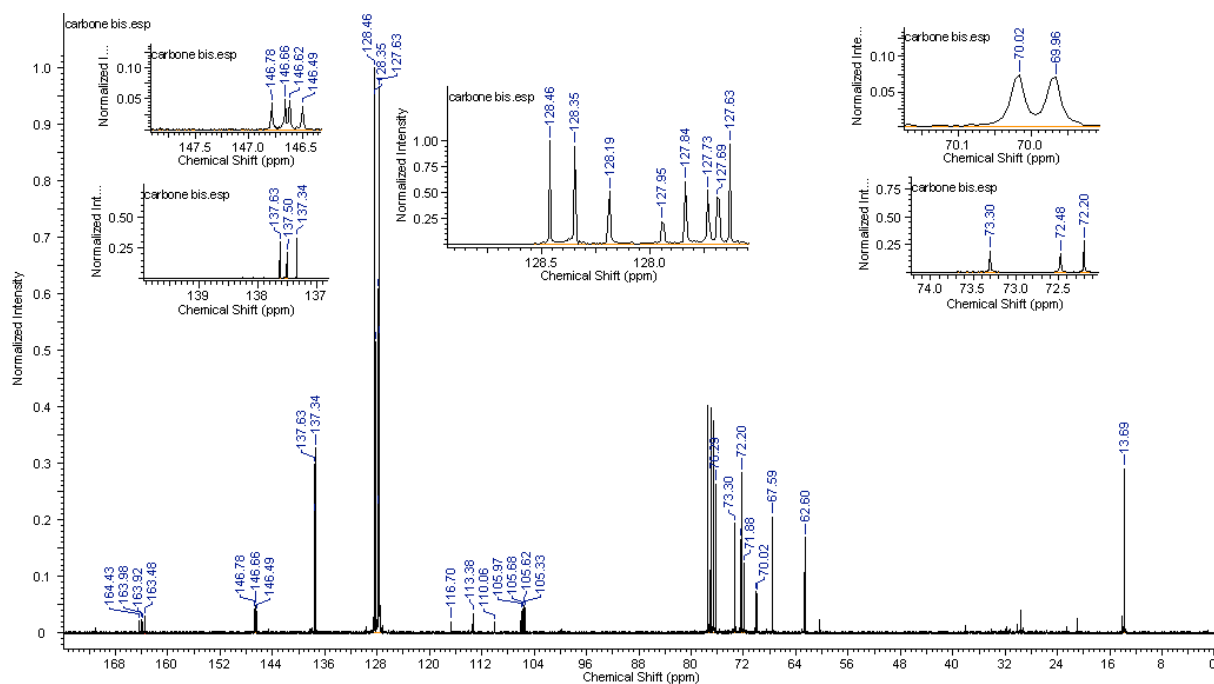

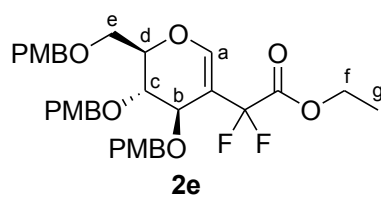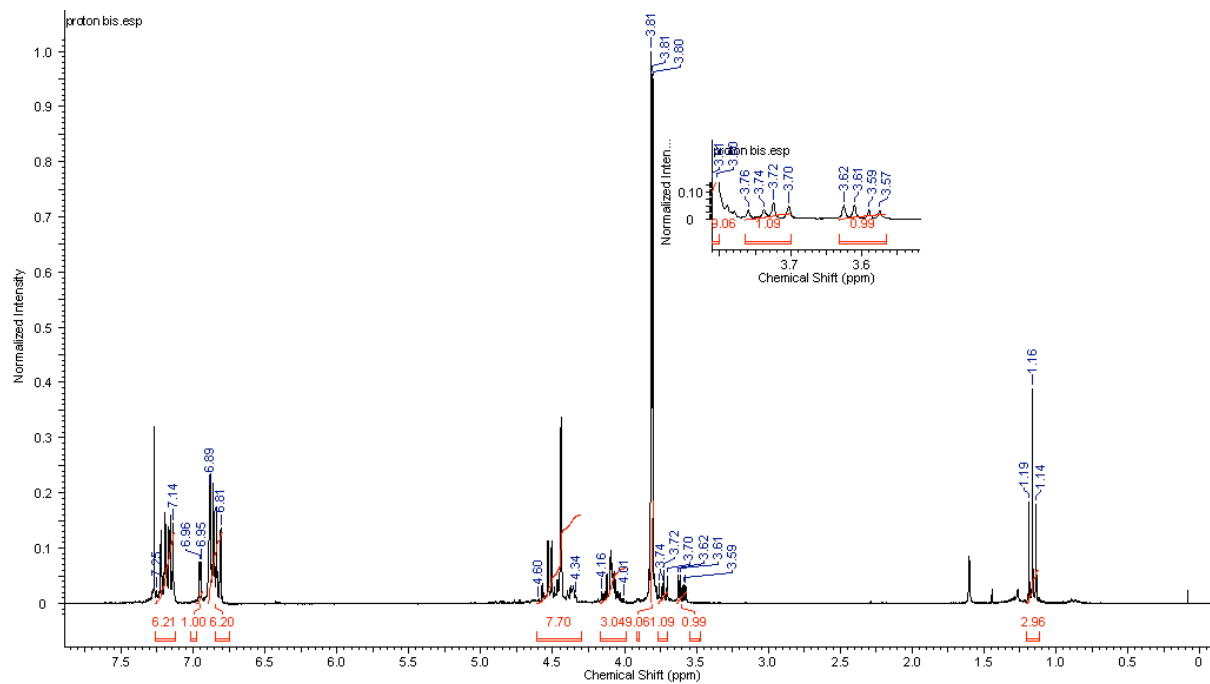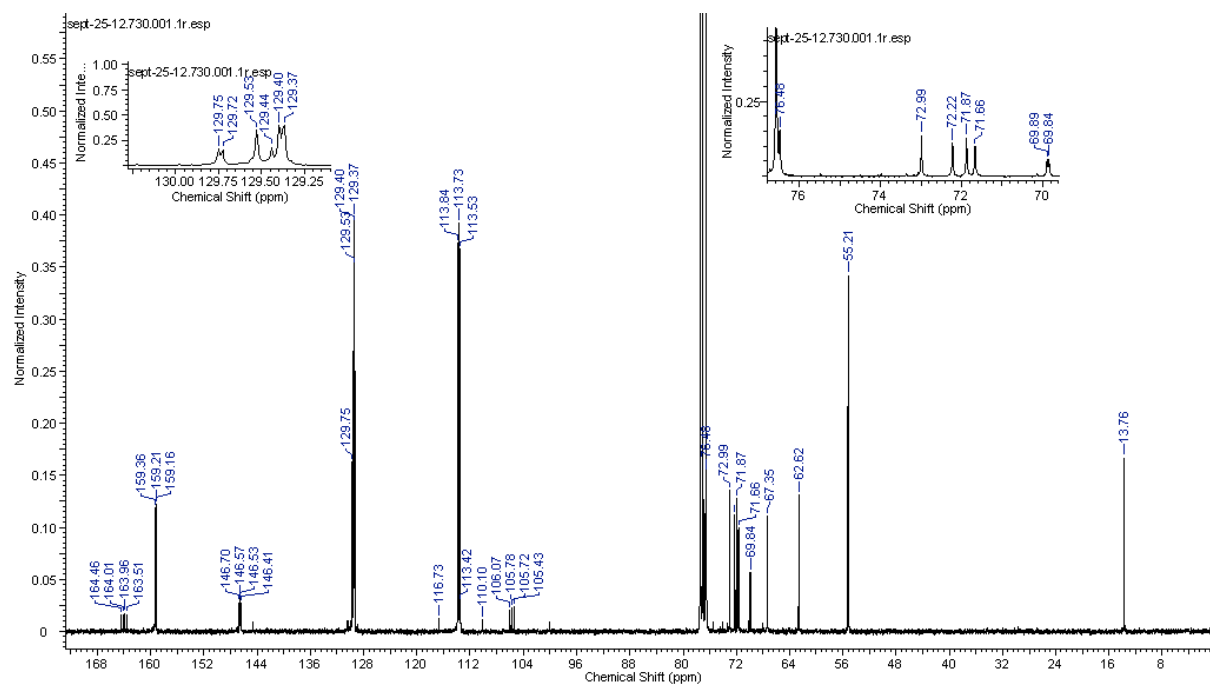

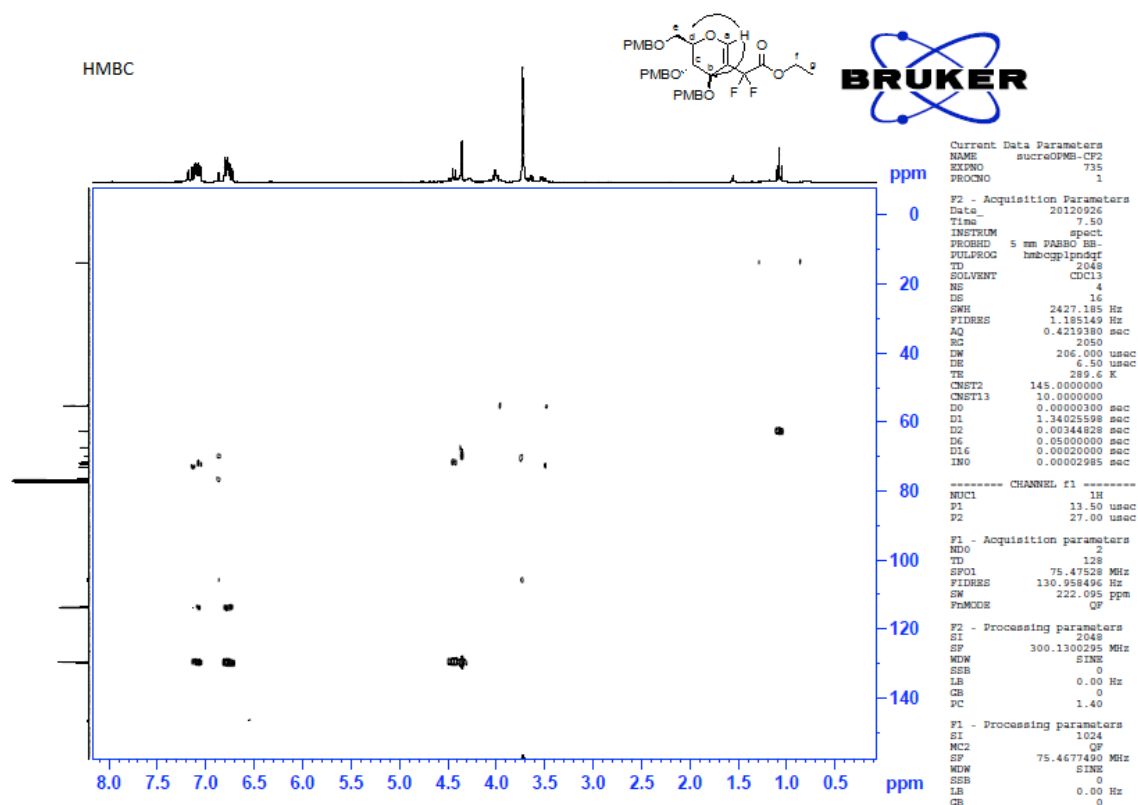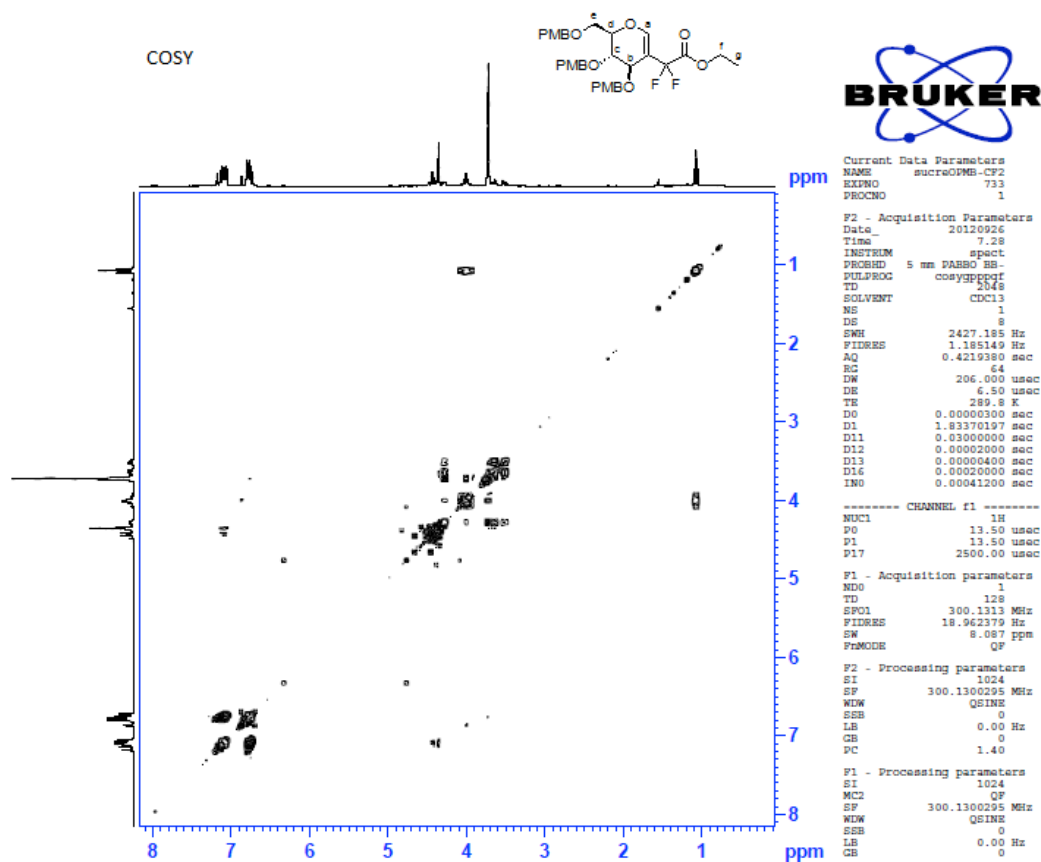



HMQC

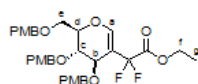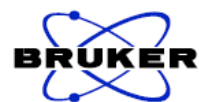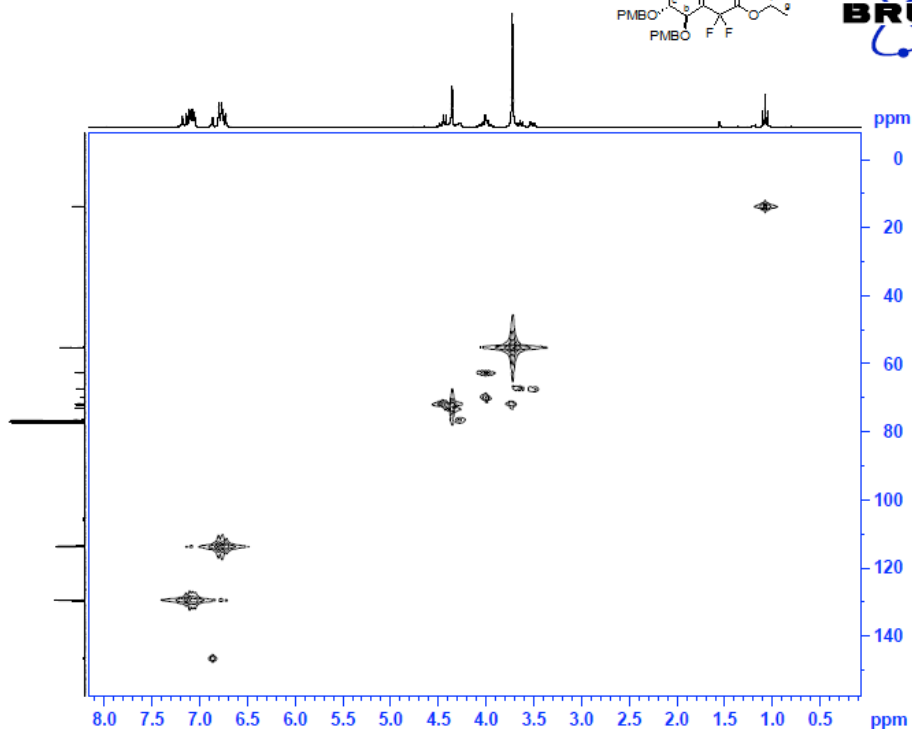

Current Data Parameters  
NAME sucsuOPMB-CF2  
EXPNO 734  
PROCNO 1

F2 - Acquisition Parameters  
Date\_ 20120926  
Time 7.35  
INSTRUM spect  
PROBHD 5 mm DABBO BB-  
PULPROG hmqc3p3g  
TD 1924  
SOLVENT CDCl3  
NS 4  
DS 16  
SWH 2427.185 Hz  
FIDRES 2.370297 Hz  
AQ 0.2109940 sec  
RG 2950  
DM 206.000 usec  
DE 6.50 usec  
TE 289.6 K  
CNET2 145.000000  
D0 0.00000100 sec  
D1 1.45781100 sec  
D2 0.00344828 sec  
D12 0.00020000 sec  
D13 0.00000400 sec  
D16 0.00020000 sec  
IN0 0.00004000 sec

----- CHANNEL f1 -----  
NUC1 1H  
P1 13.50 usec  
P2 27.00 usec

F1 - Acquisition parameters  
ND0 2  
TD 128  
SFO1 75.47341 MHz  
FIDRES 97.666824 Hz  
SN 165.639 ppm  
P0MODE QF

F2 - Processing parameters  
SI 1024  
SF 300.1300295 MHz  
WDW QSI  
SSB 2  
LB 0.00 Hz  
GB 0  
PC 1.40

F1 - Processing parameters  
SI 1024  
MC2 QF  
SF 75.4677490 MHz  
WDW QSI  
SSB 2  
LB 0.00 Hz  
GB 0

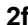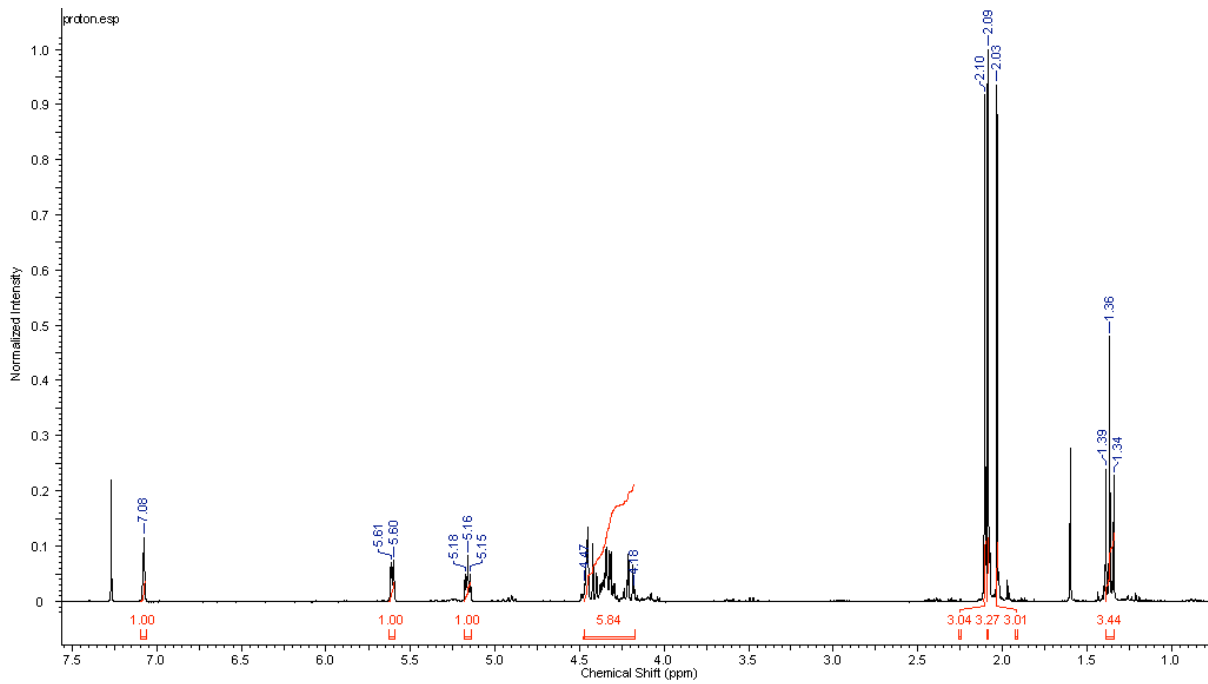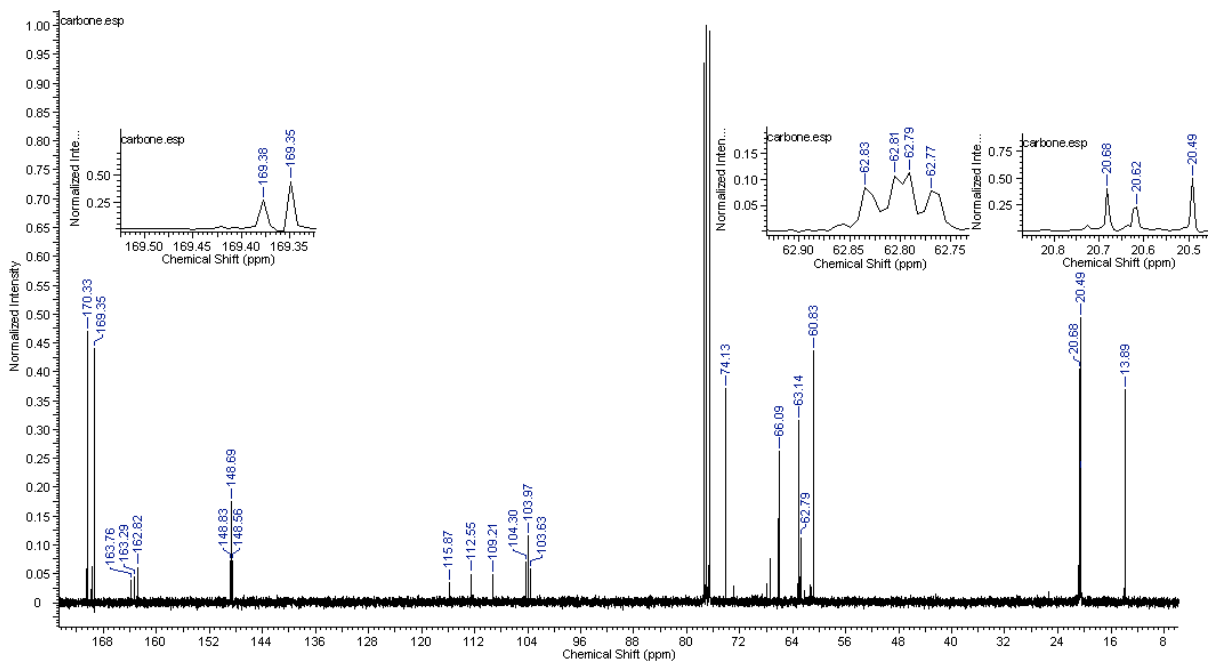

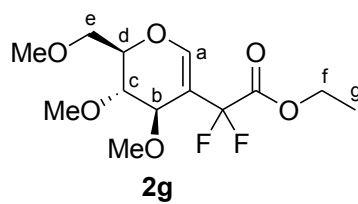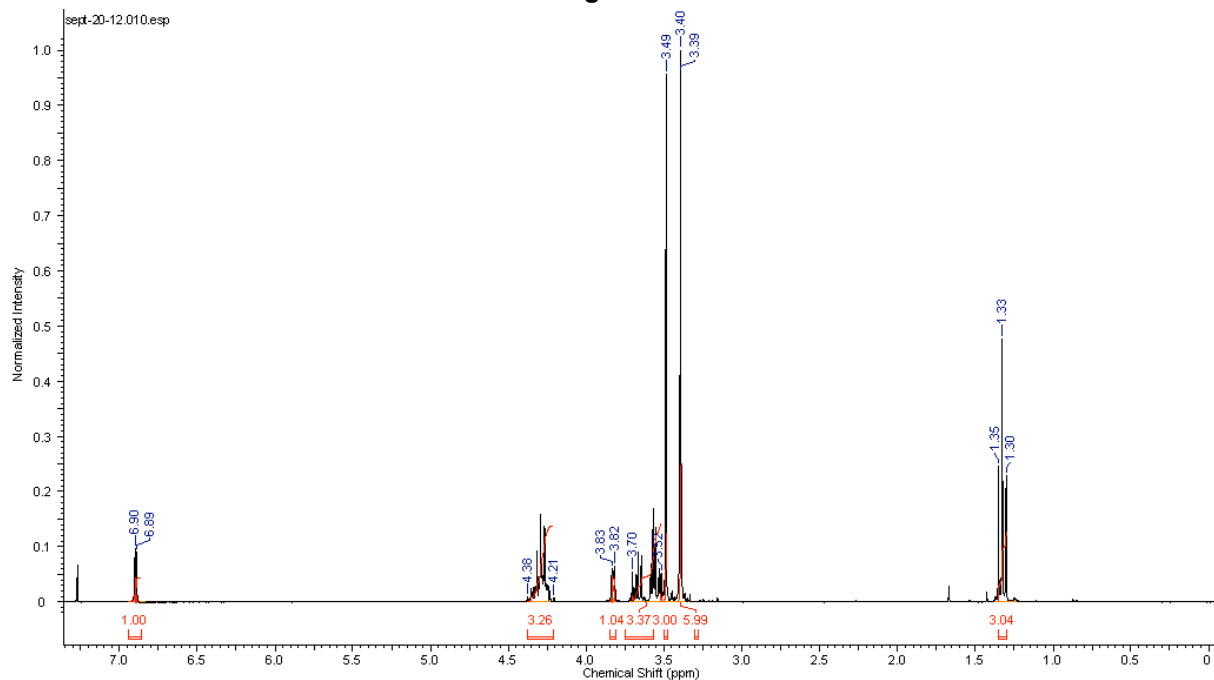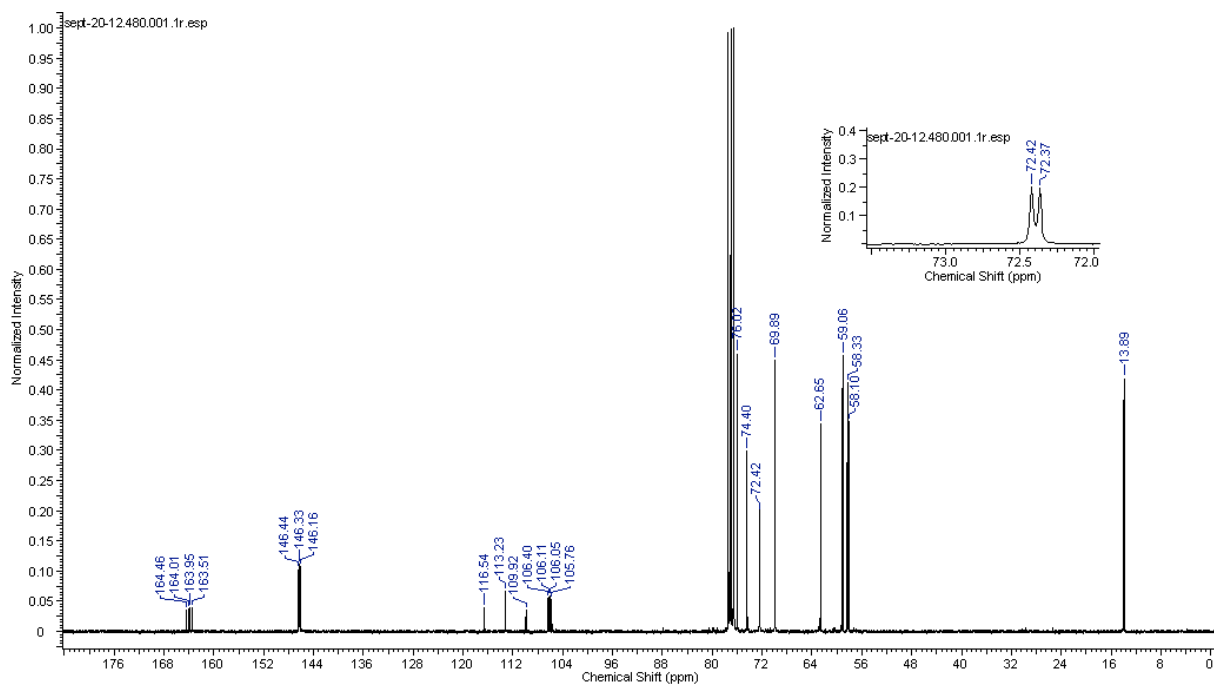

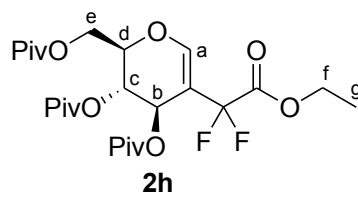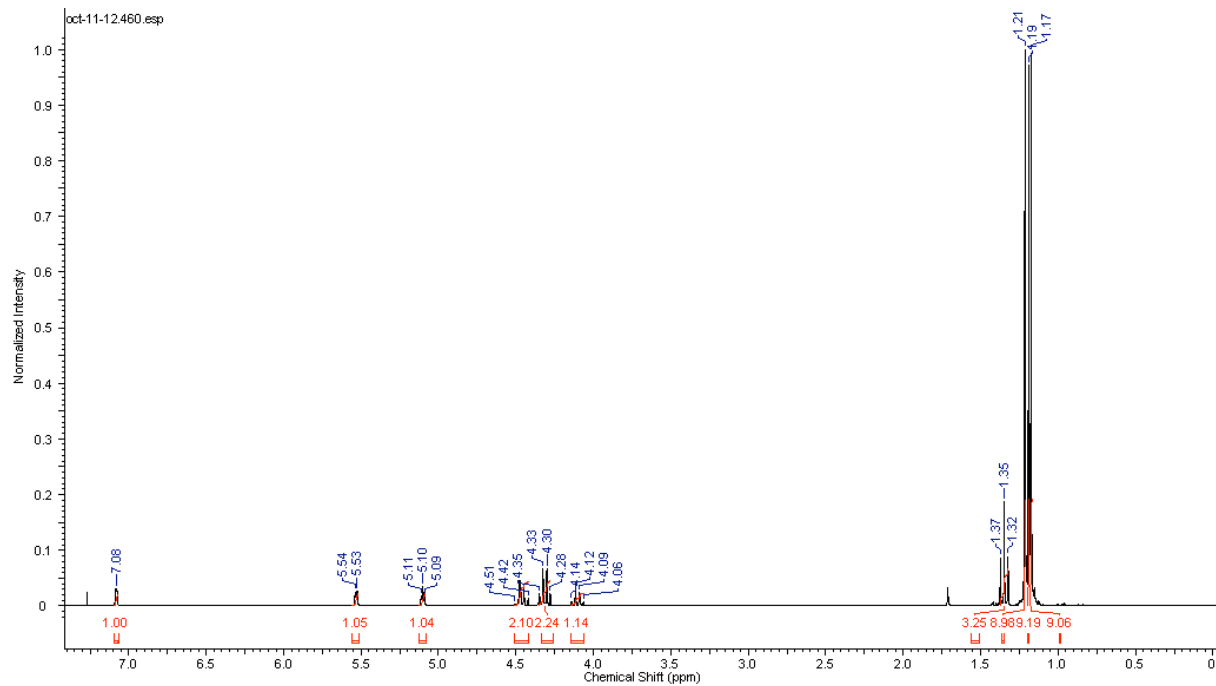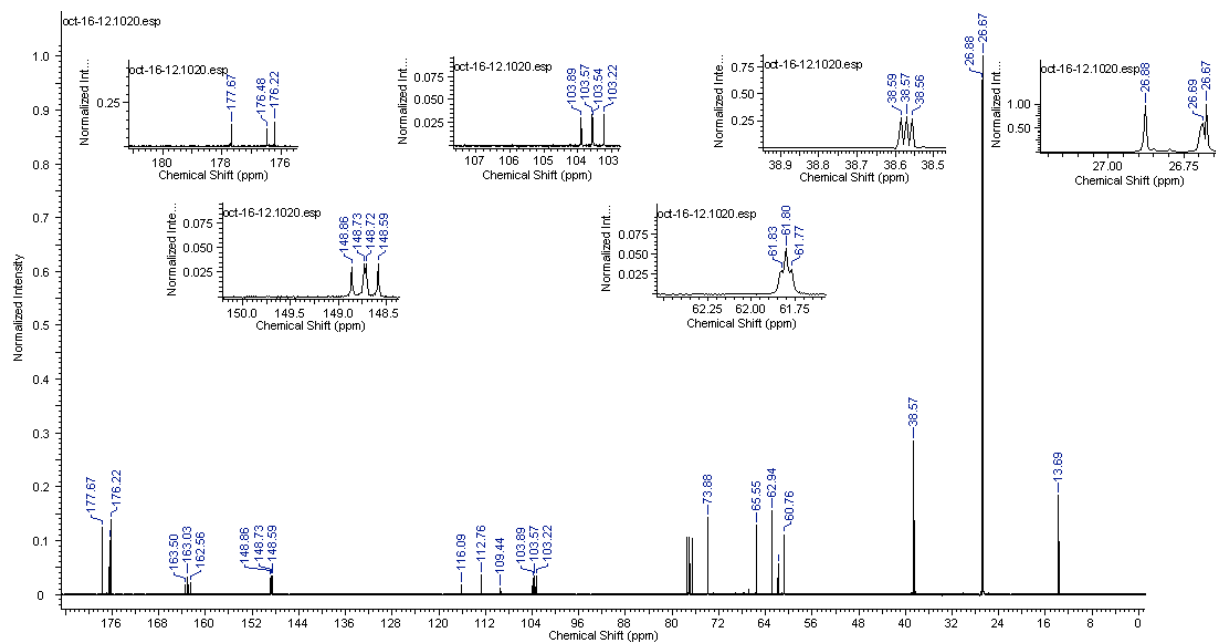

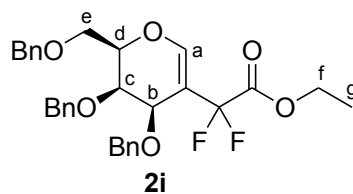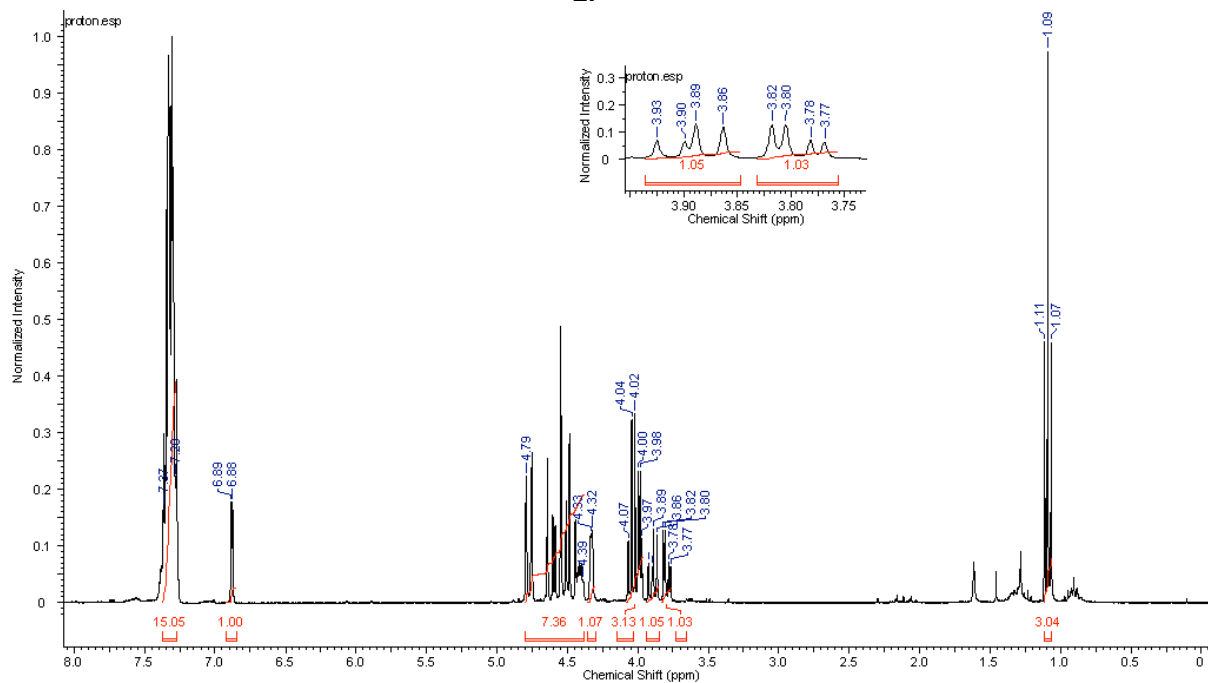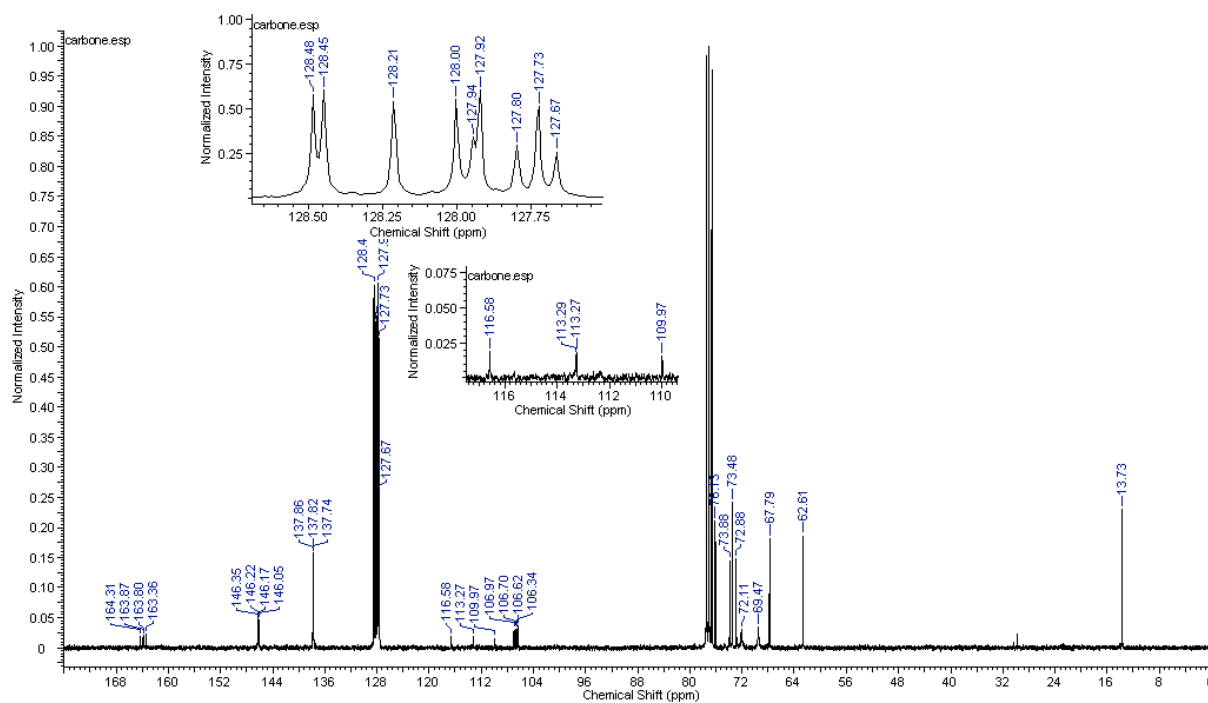

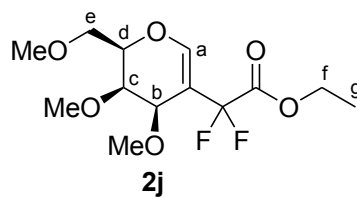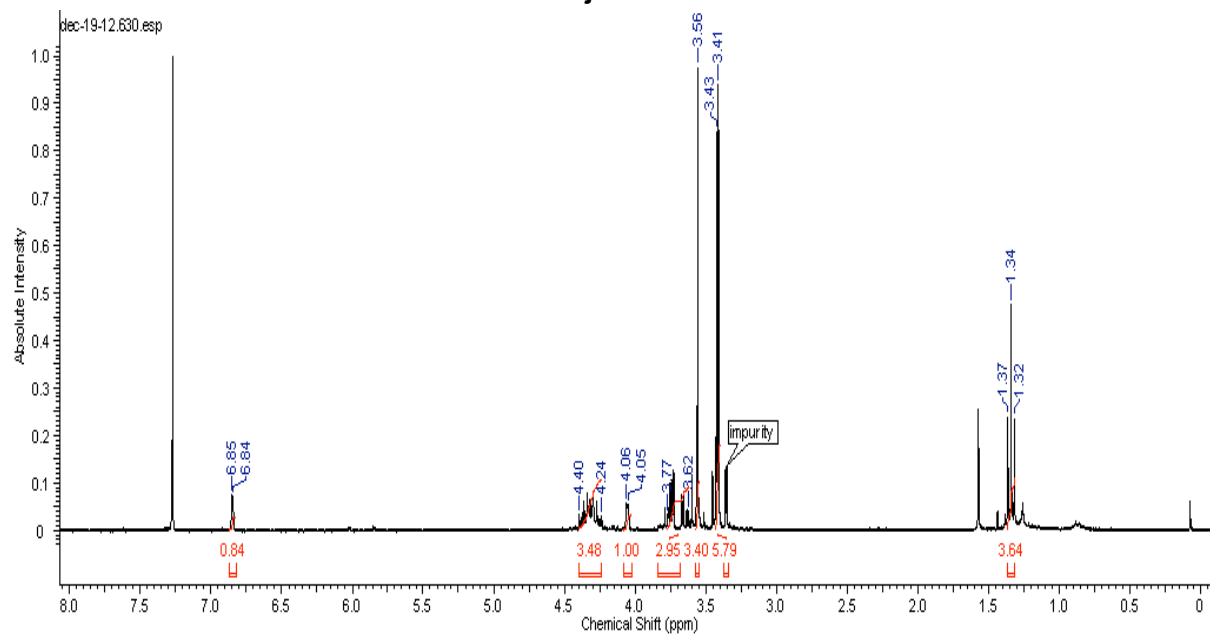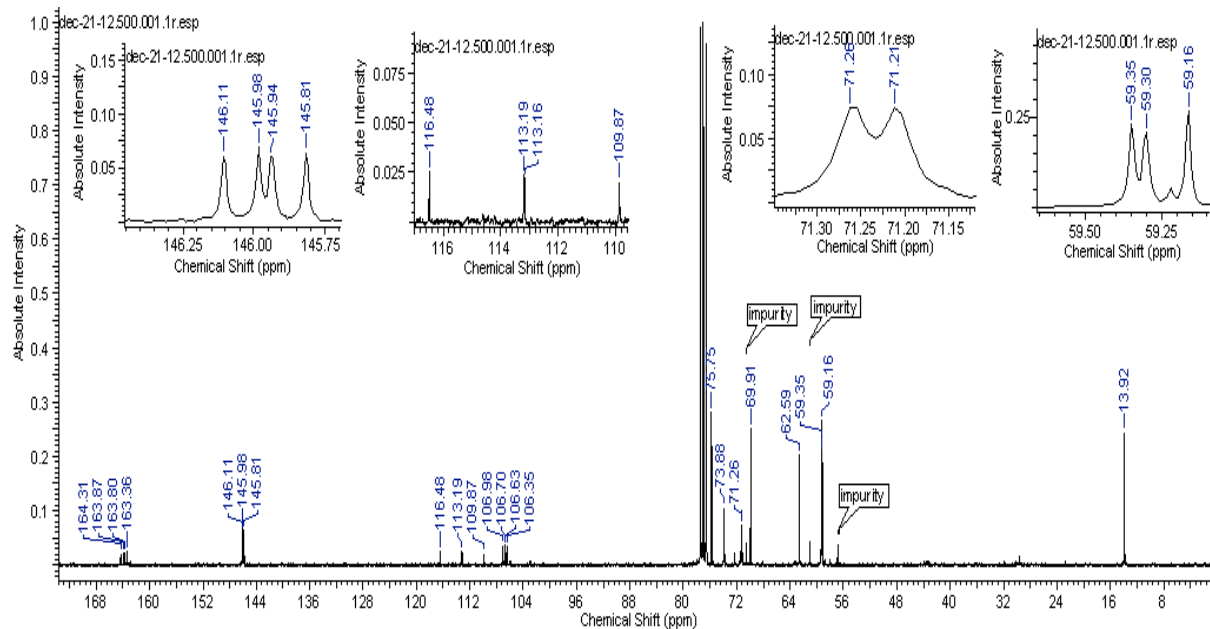

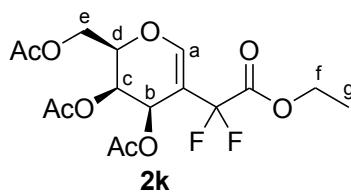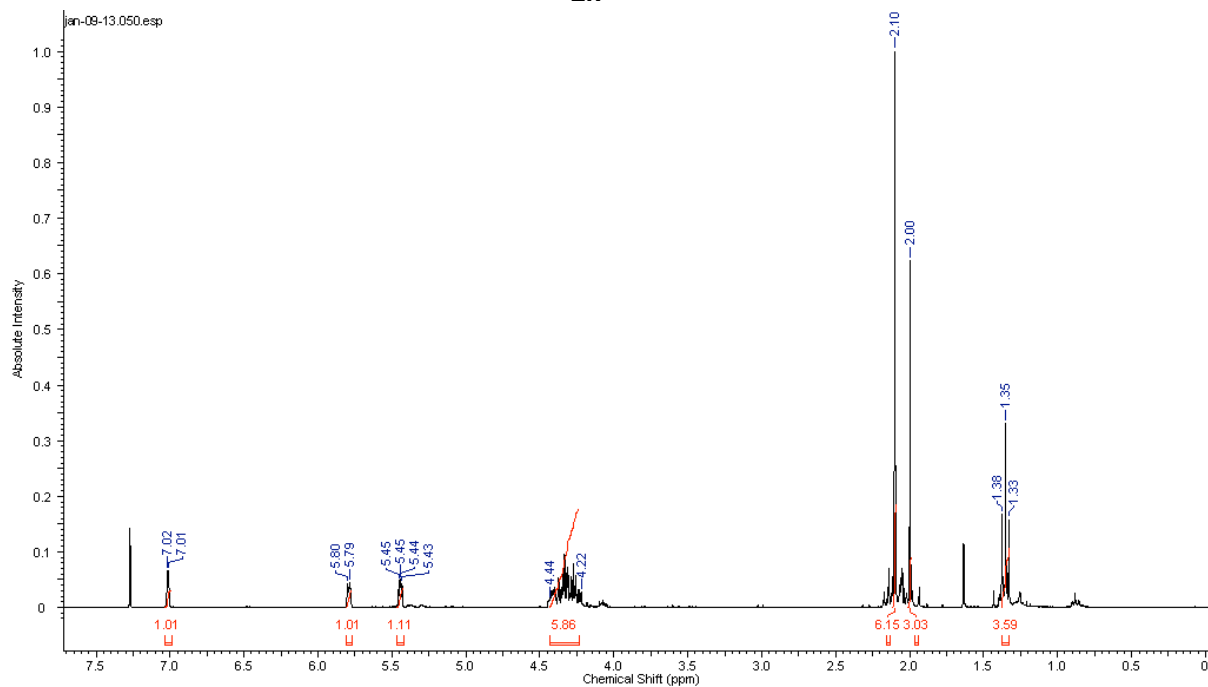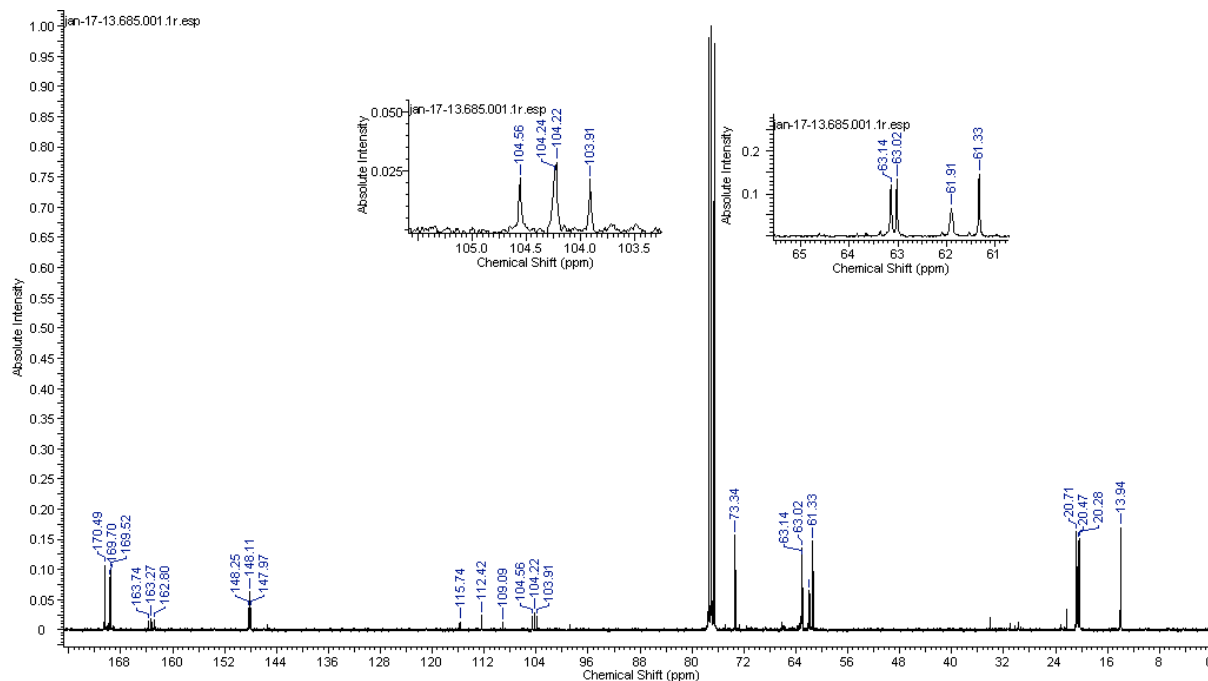

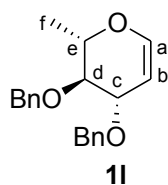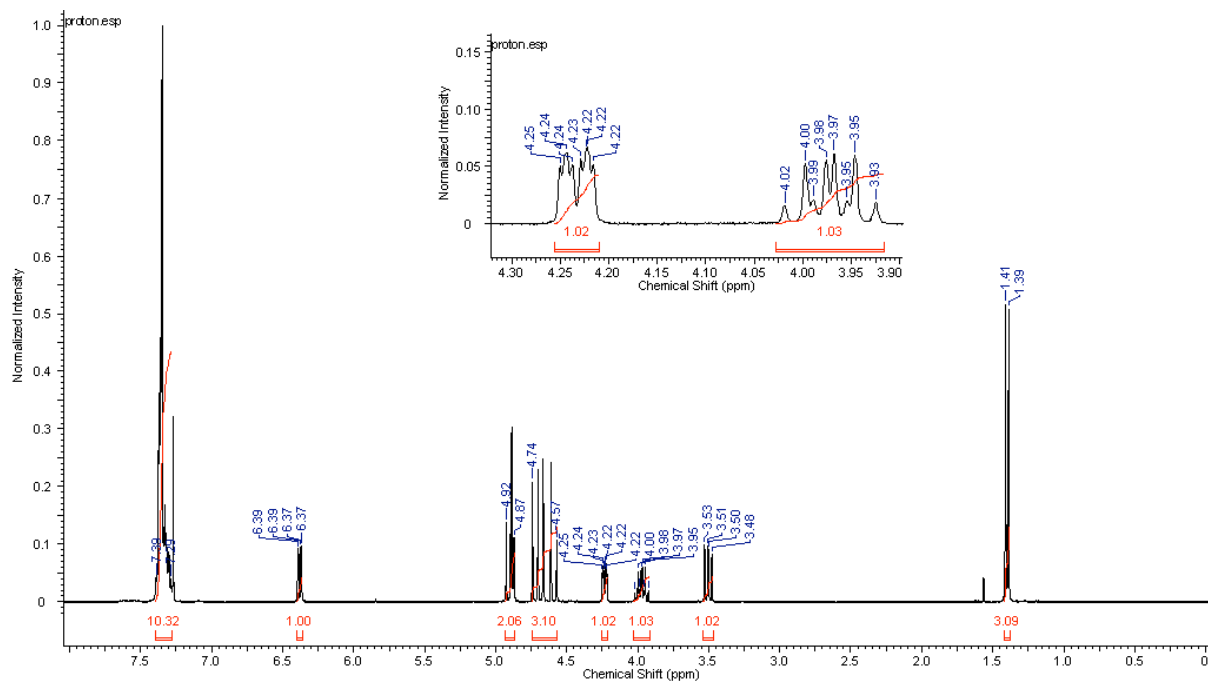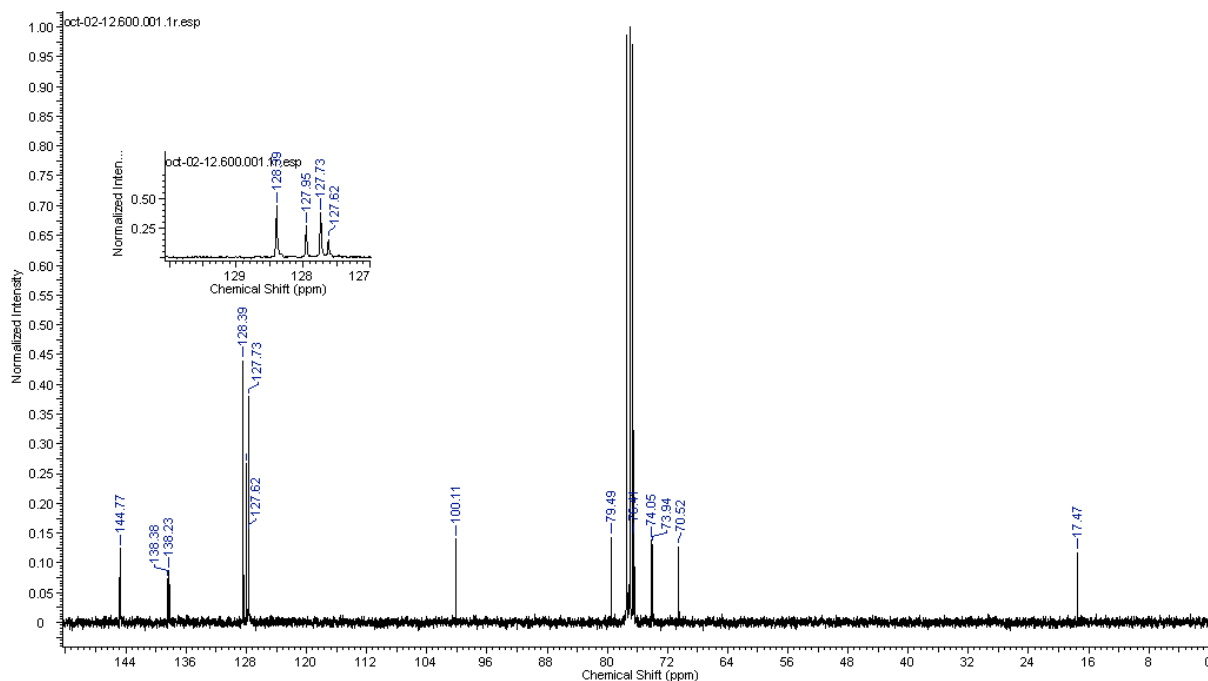



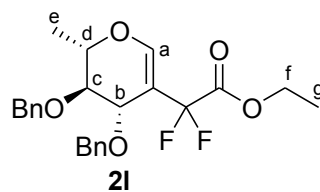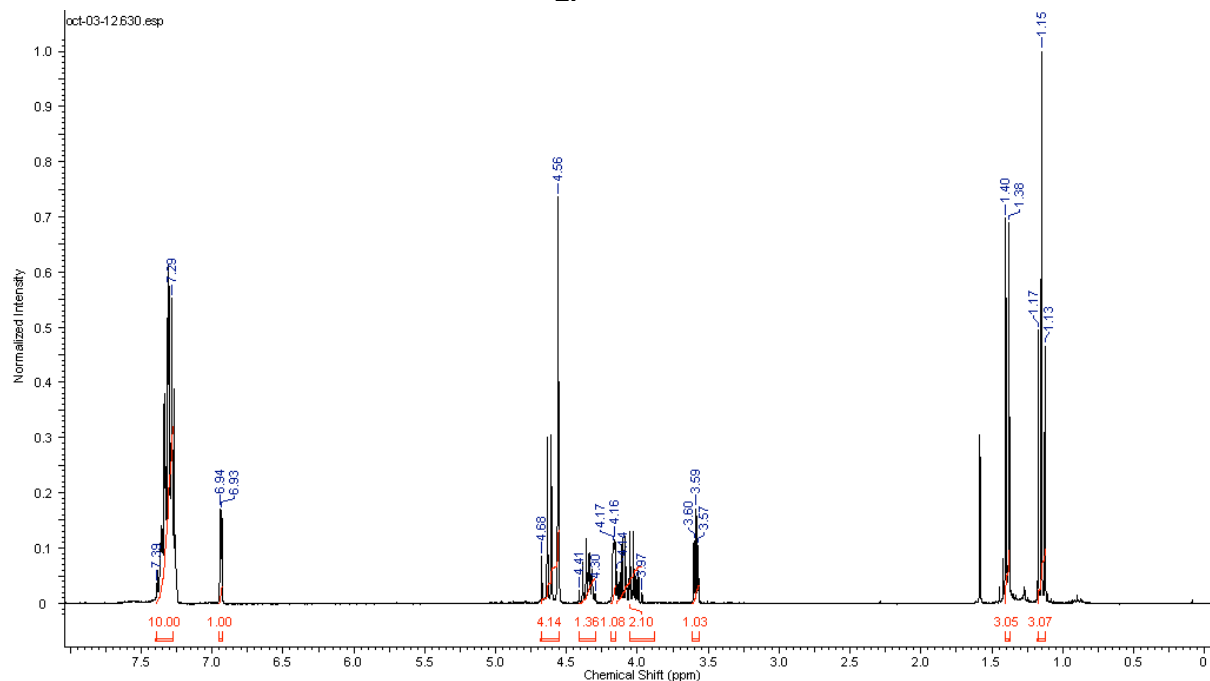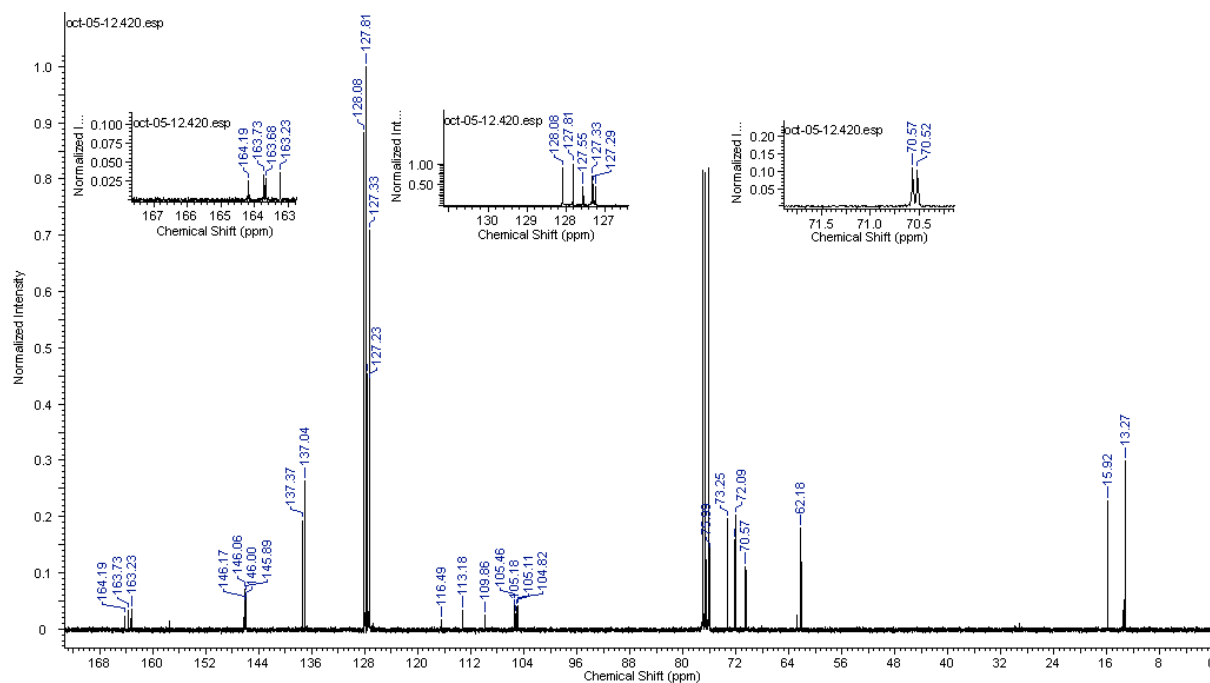

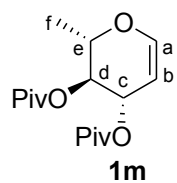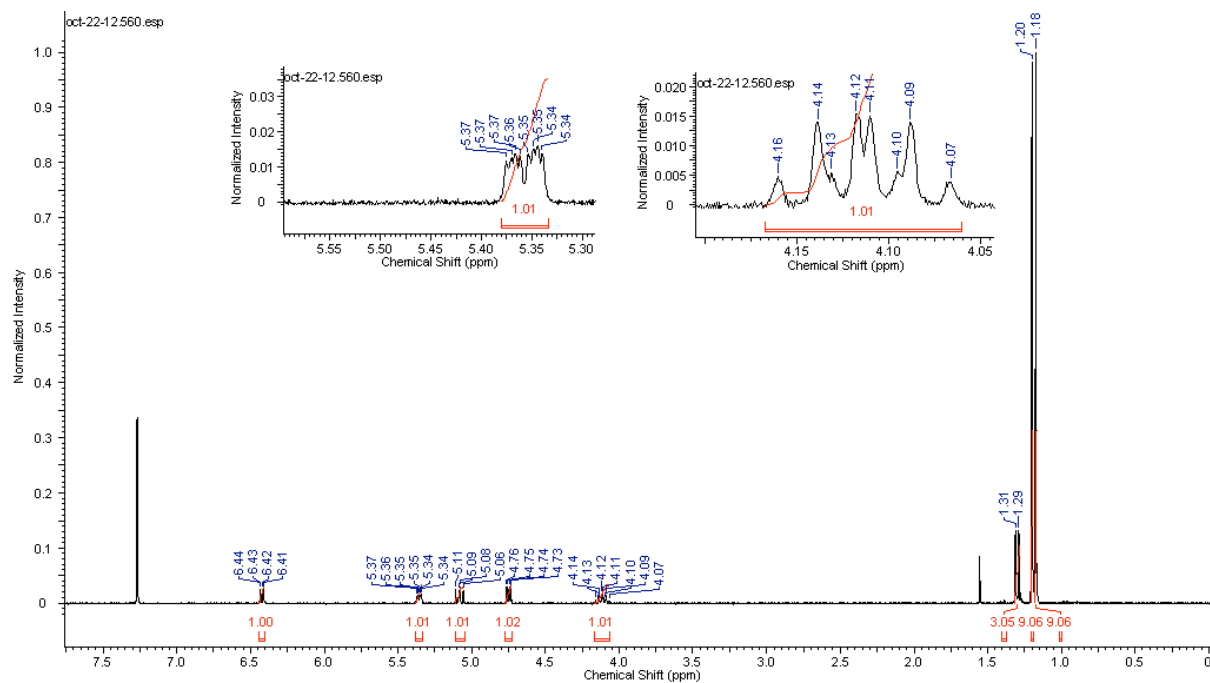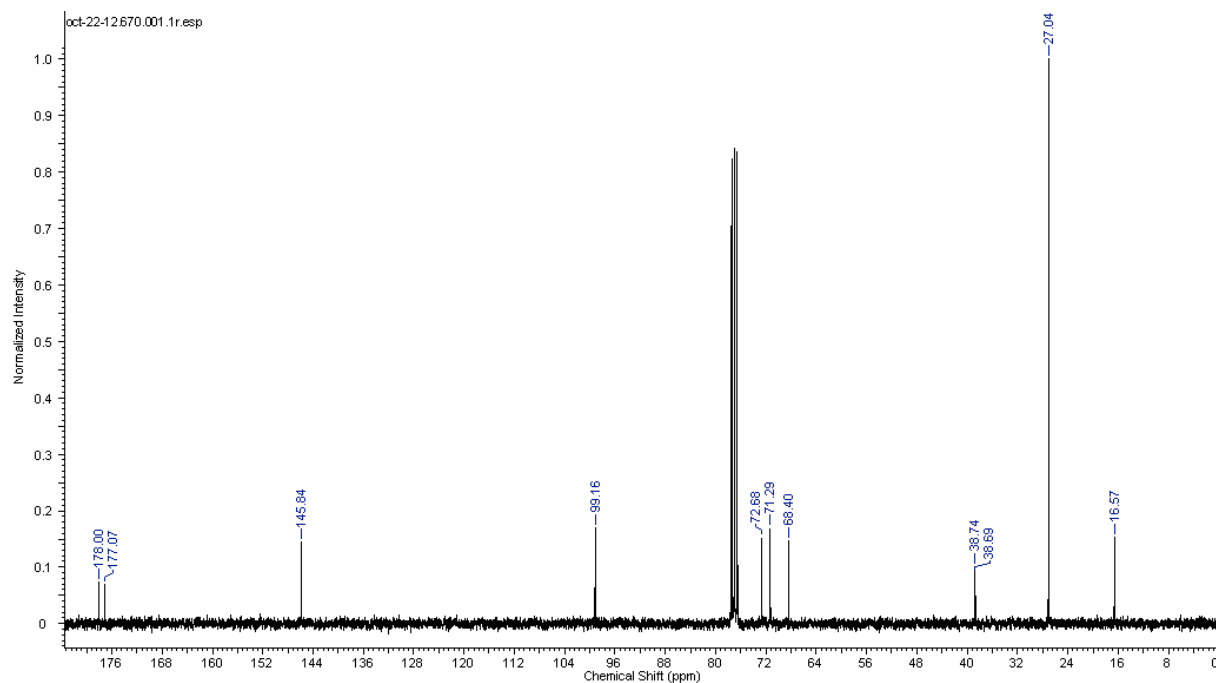

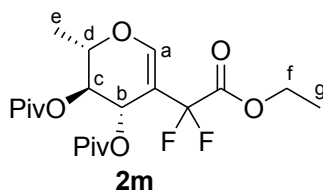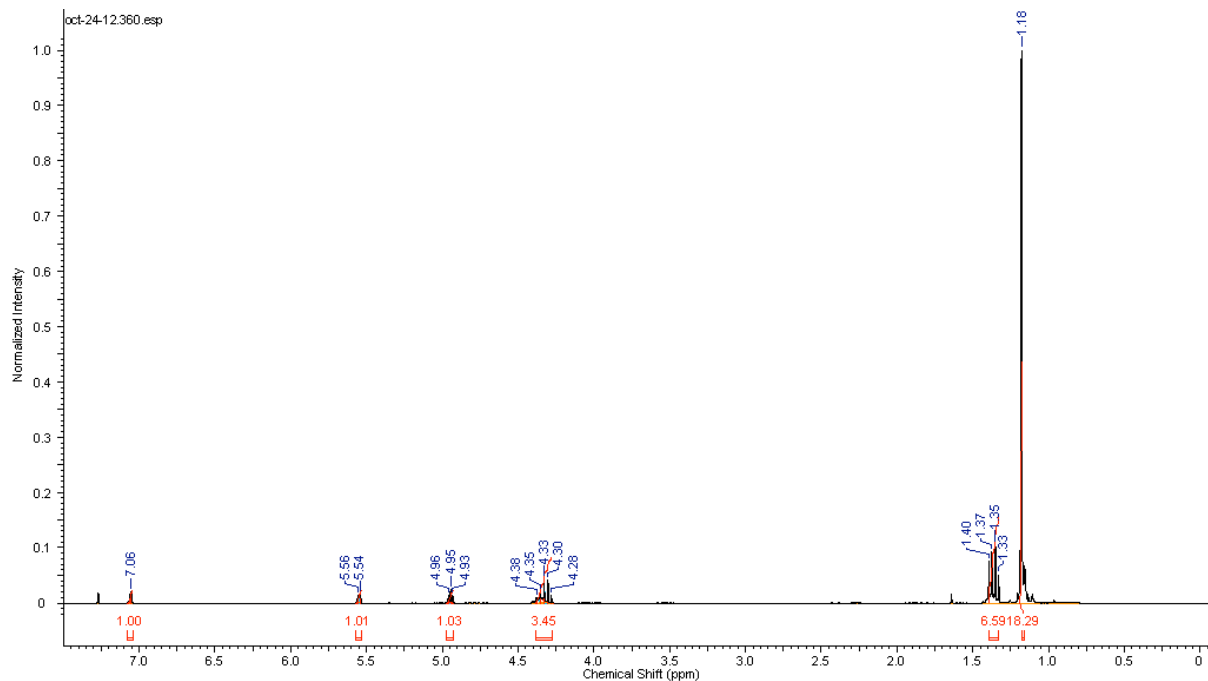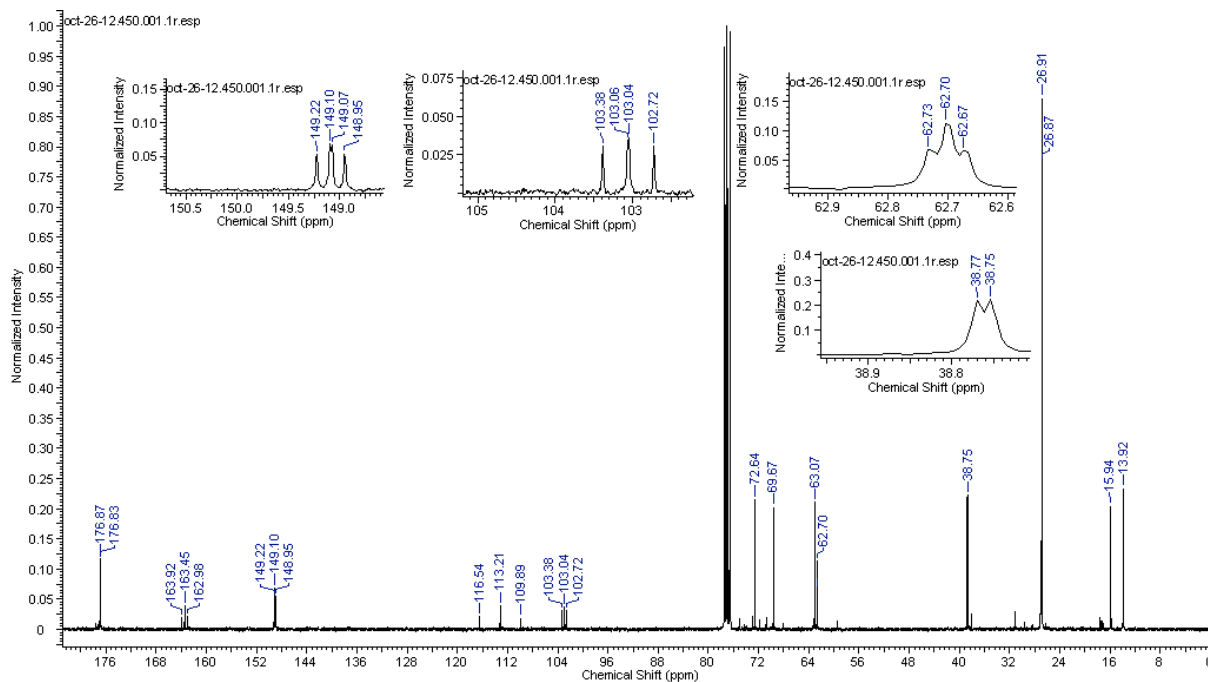

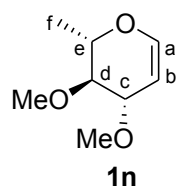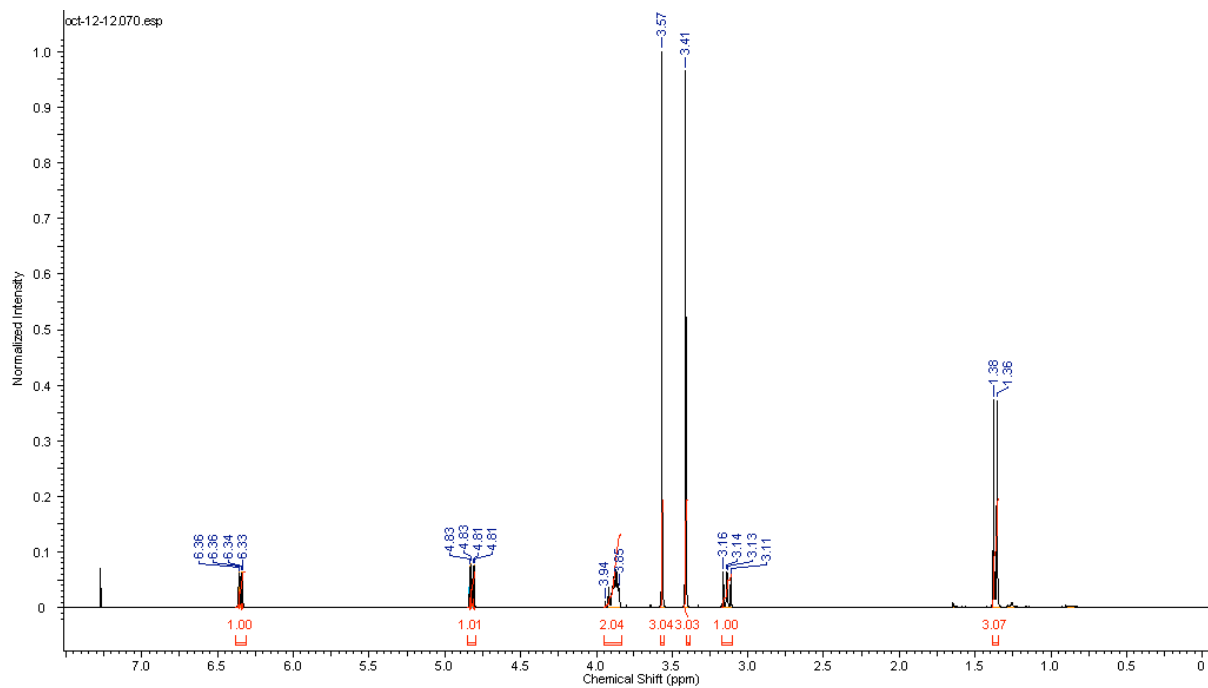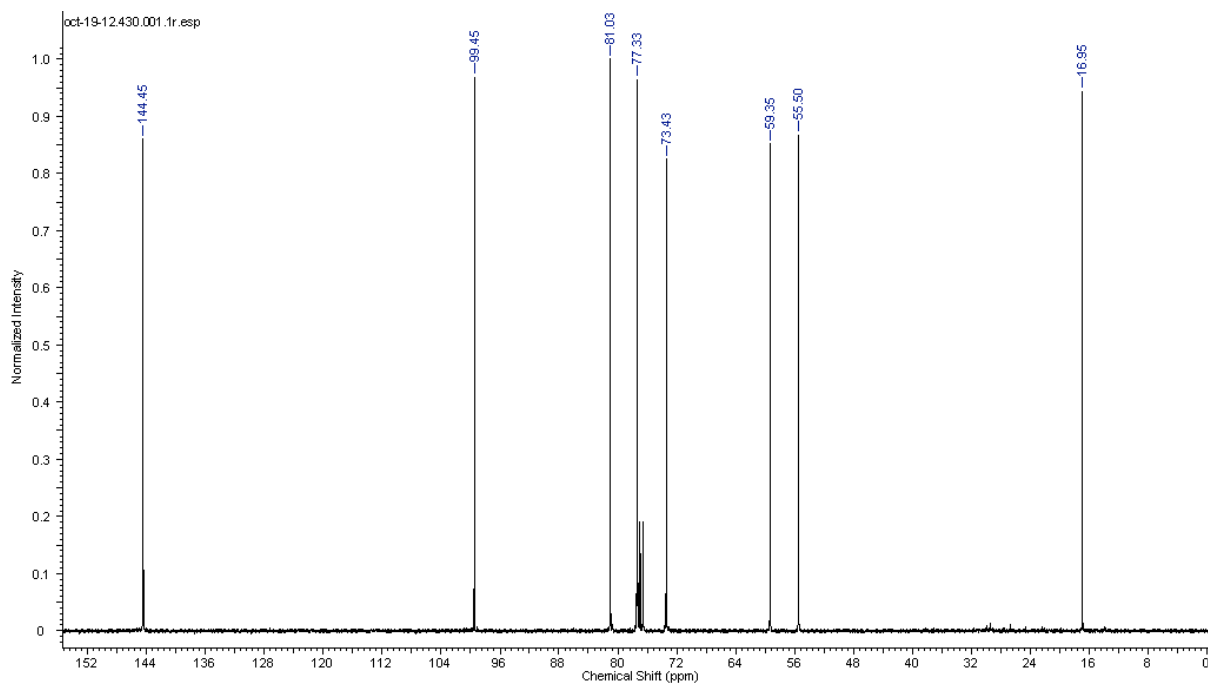

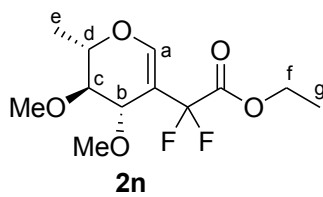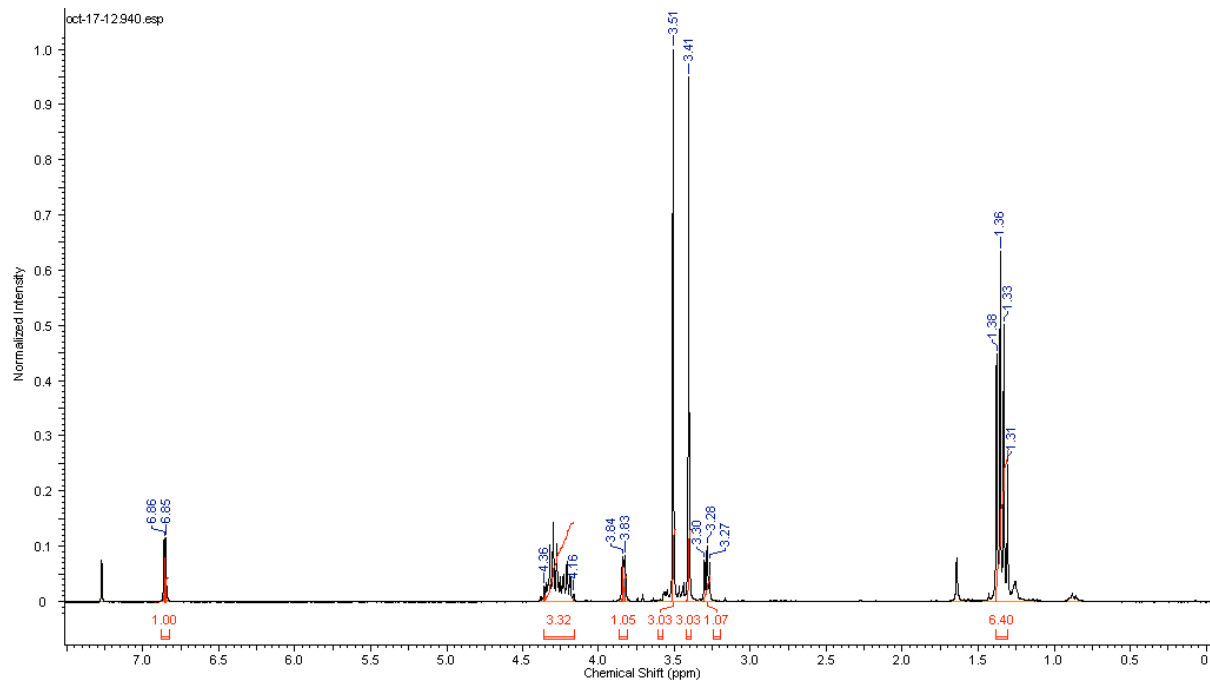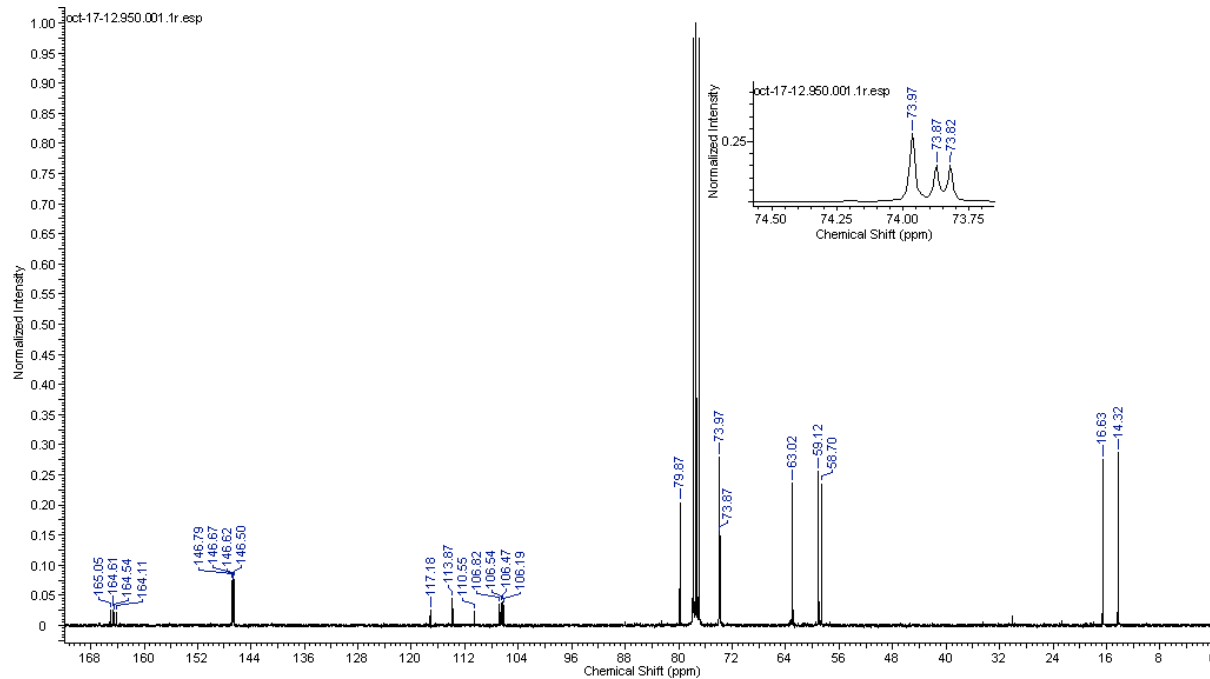

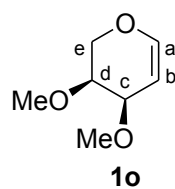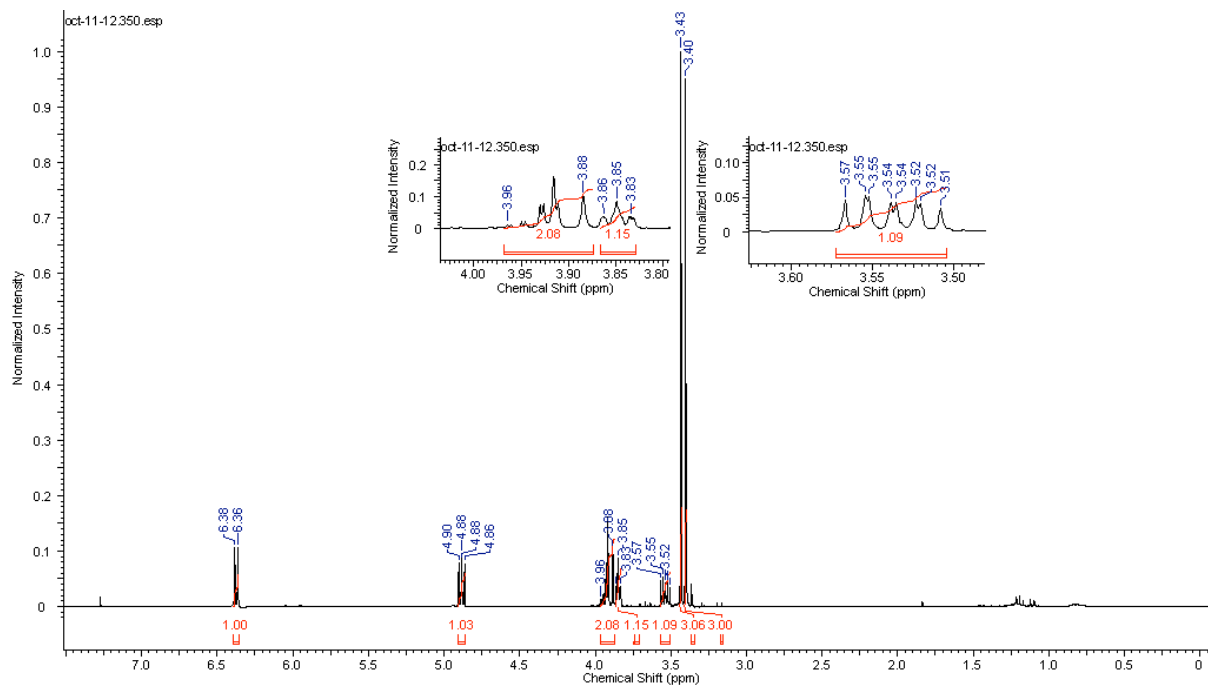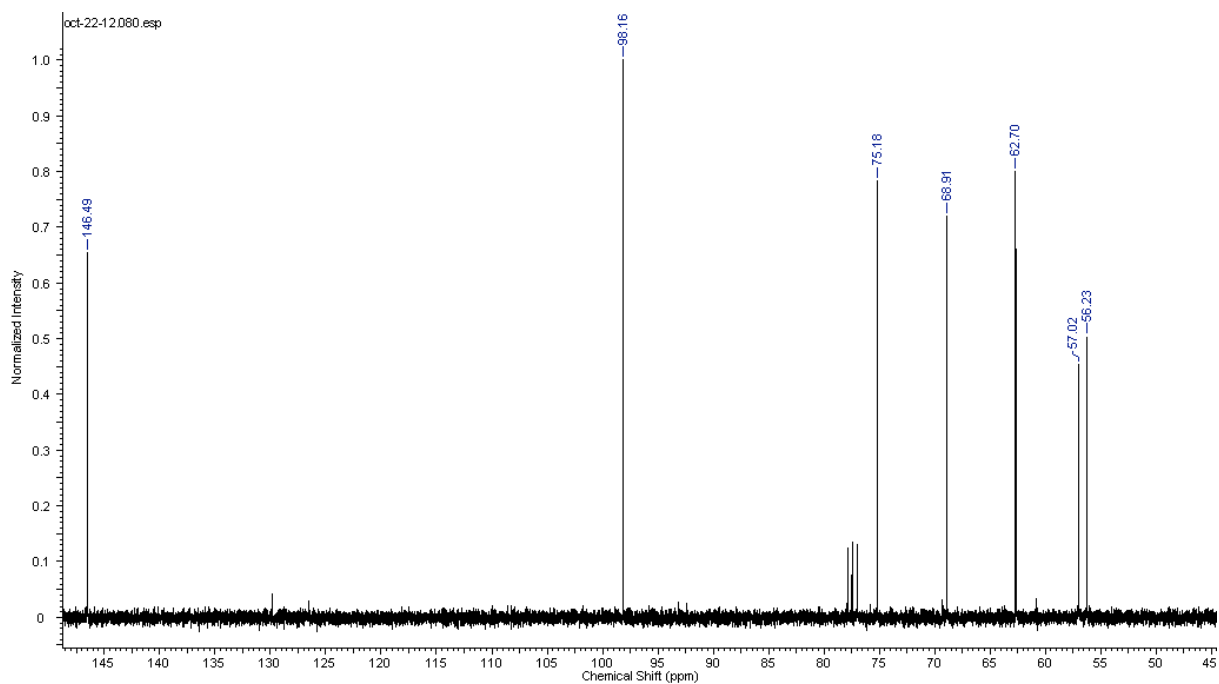

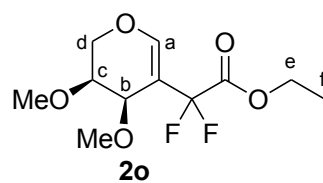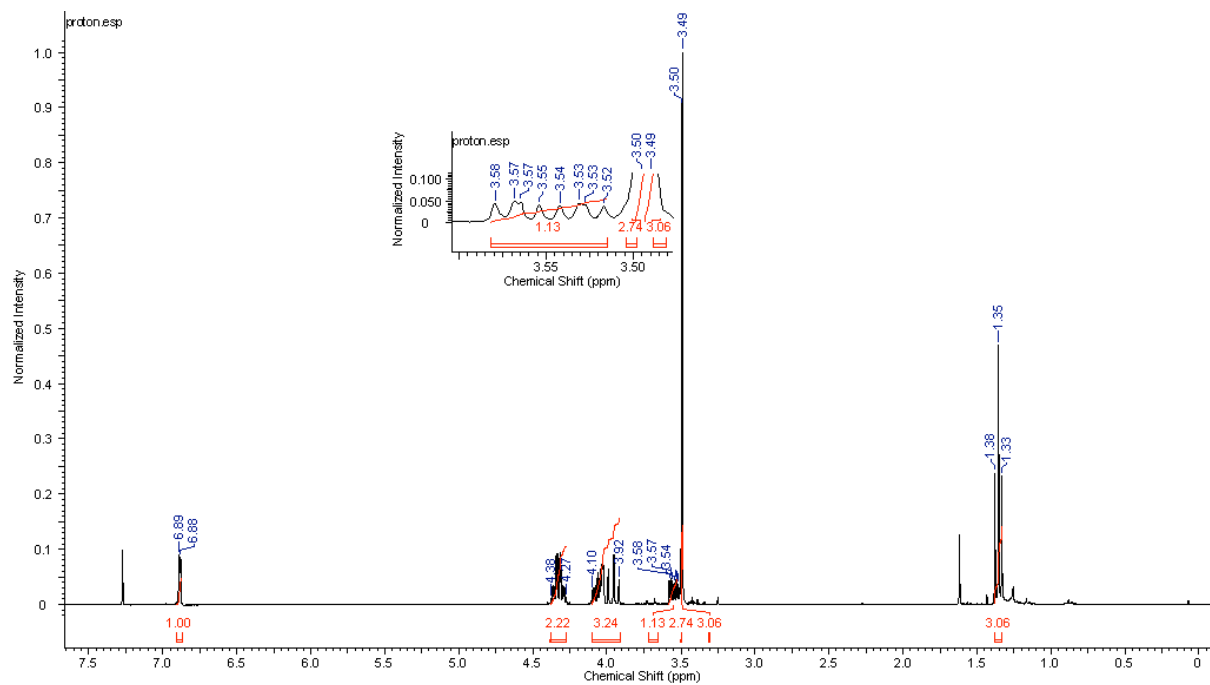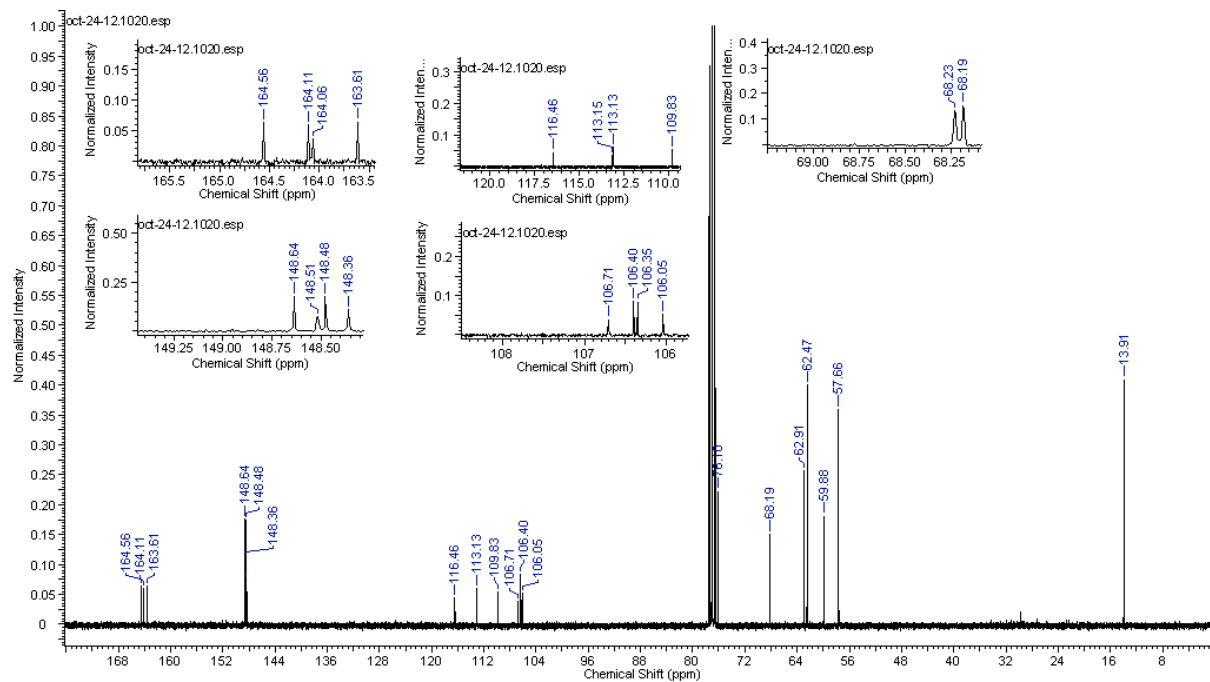

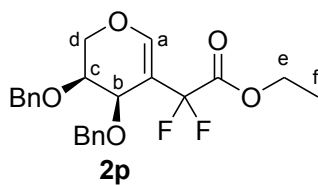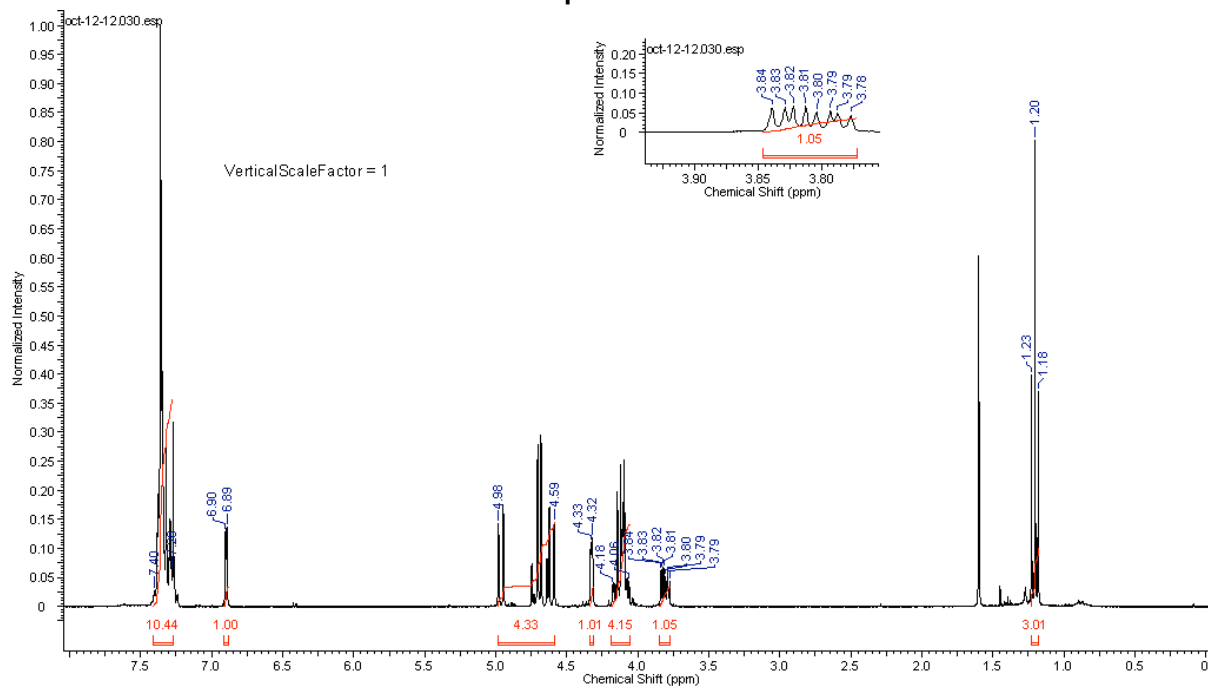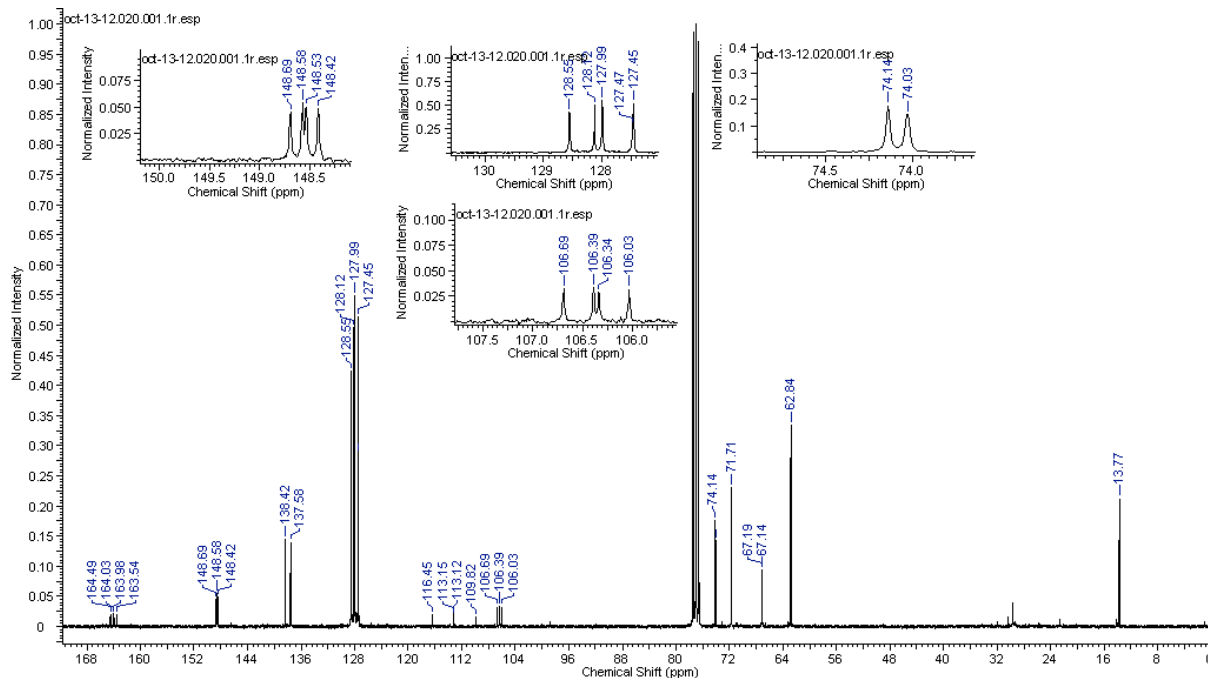



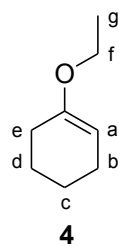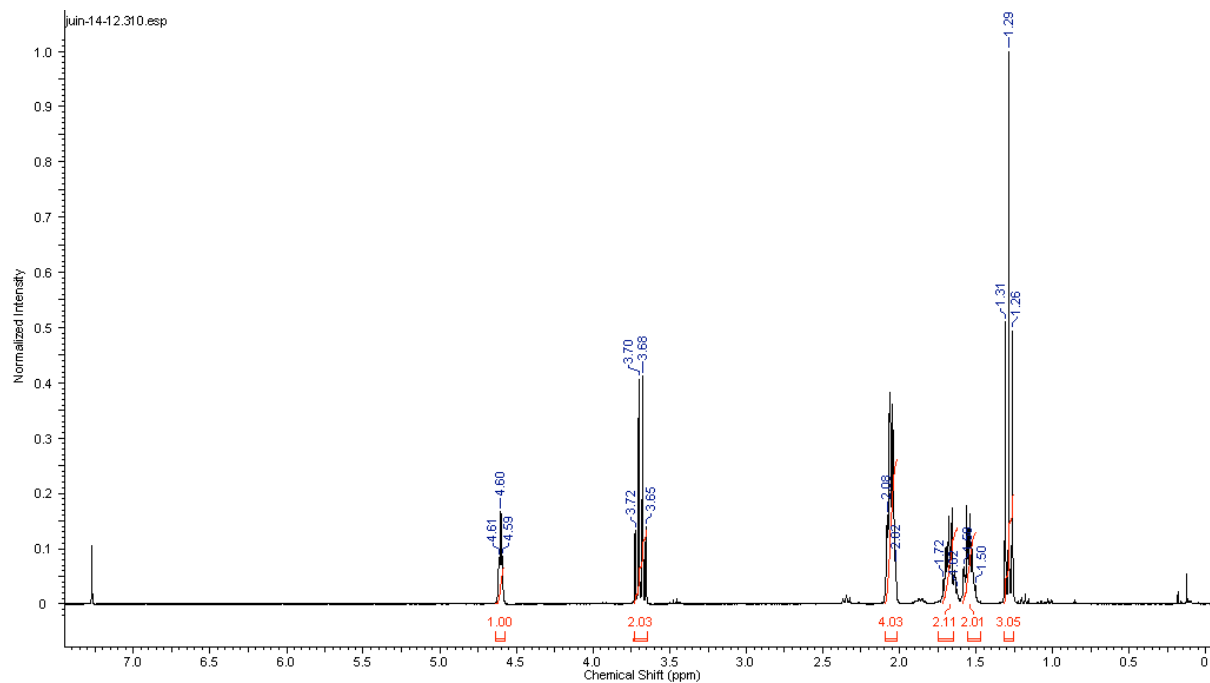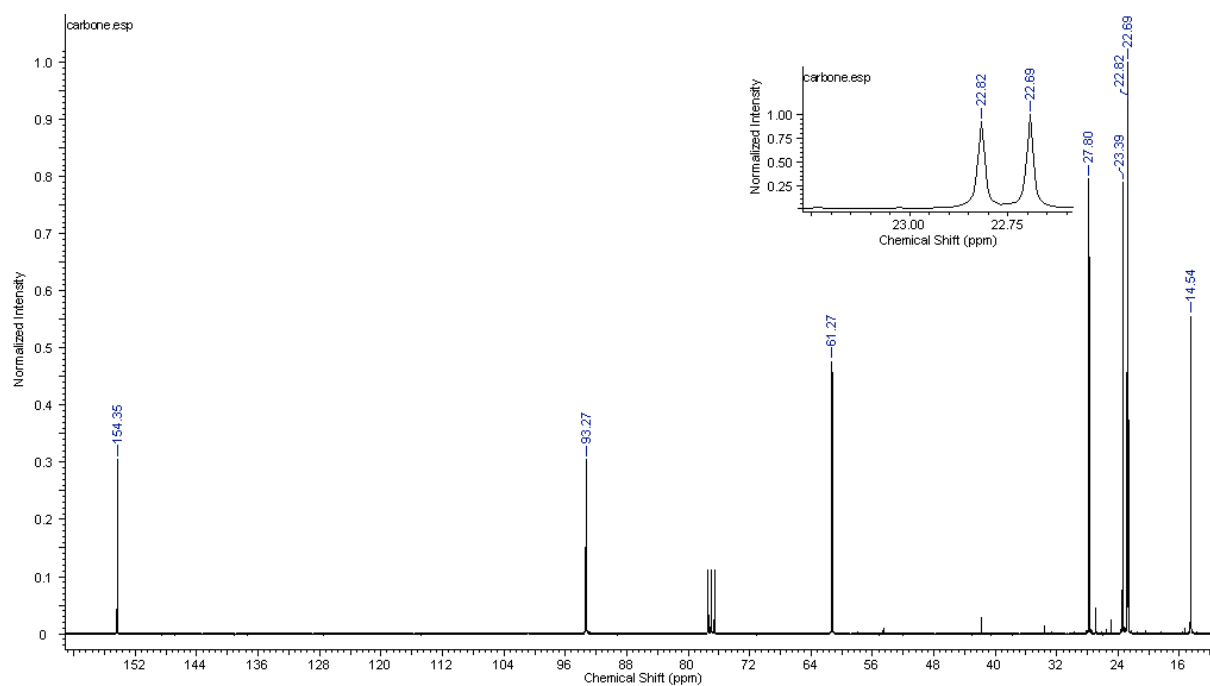

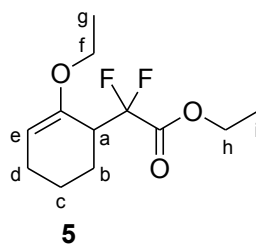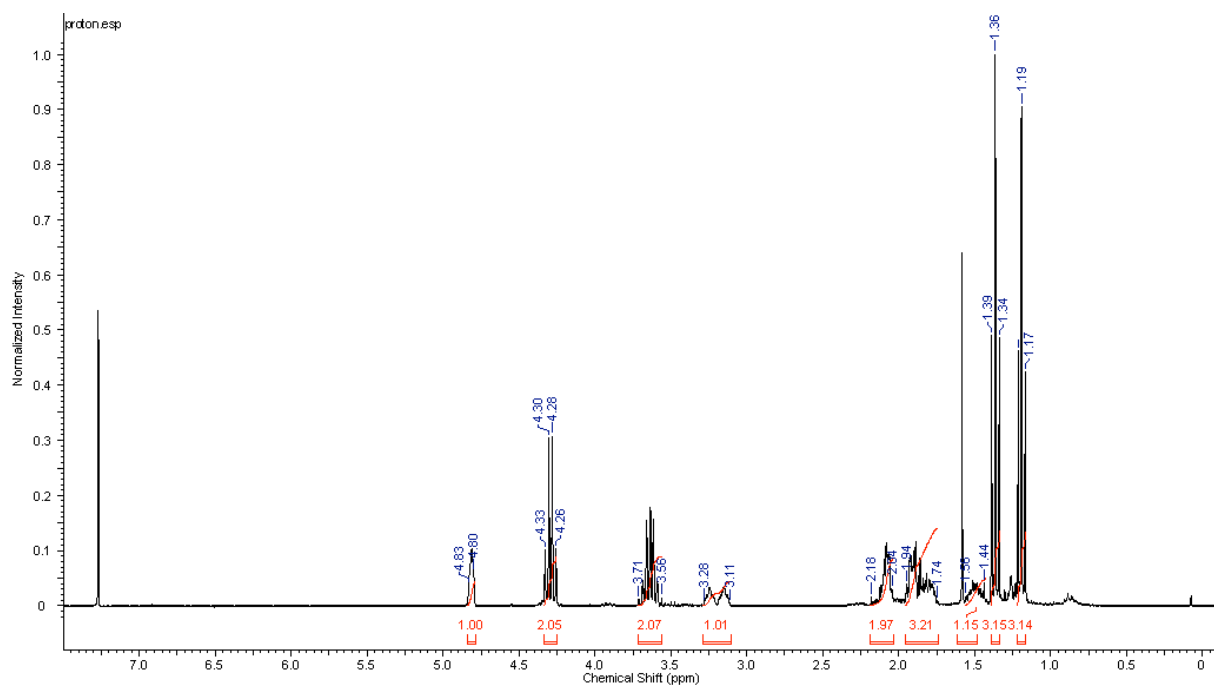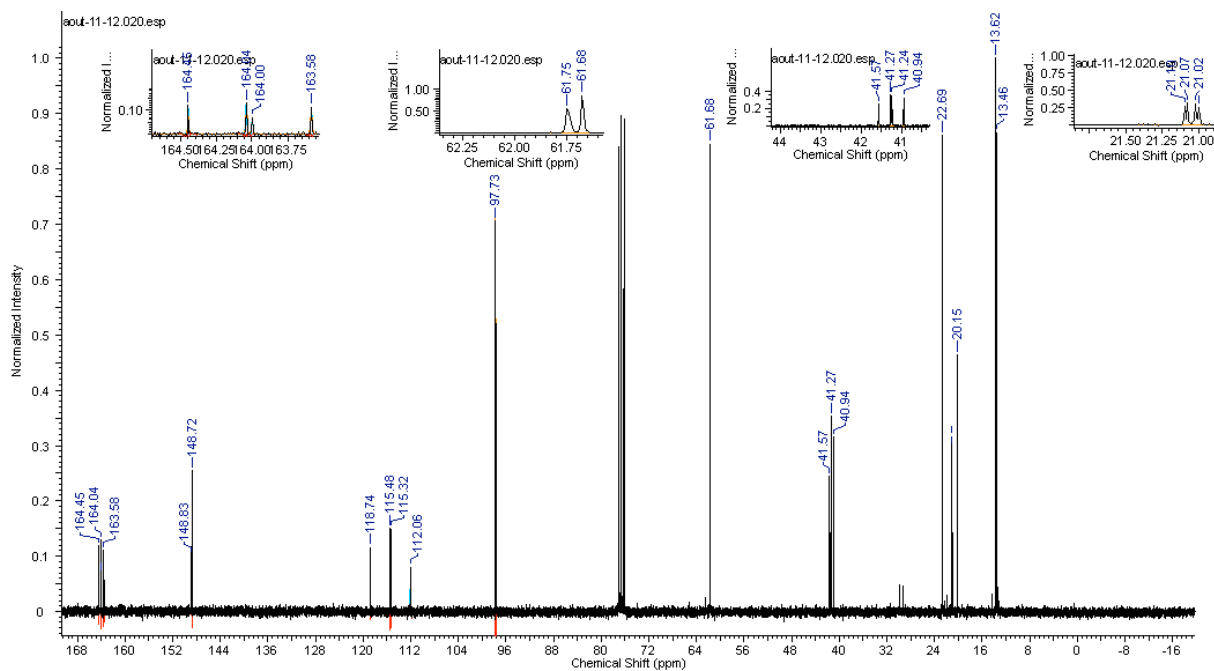

Supplement: Supplementary file 1 [file 4038493]
